# Supplementary material for: Anaesthetic protocol for paediatric glaucoma examinations: the prospective EyeBIS Study protocol
Source: PubMed Central journal article supplement — BMJ Open. 2021 Oct 5;11(10):e045906. doi: 10.1136/bmjopen-2020-045906 (PMC8493900; doi:10.1136/bmjopen-2020-045906), 2021-10-05
Supplement: bmjopen-2020-045906.draft_revisions.pdf [file bmjopen-2020-045906.draft_revisions.pdf]

# BMJ Open

BMJ Open is committed to open peer review. As part of this commitment we make the peer review history of every article we publish publicly available.

When an article is published we post the peer reviewers' comments and the authors' responses online. We also post the versions of the paper that were used during peer review. These are the versions that the peer review comments apply to.

The versions of the paper that follow are the versions that were submitted during the peer review process. They are not the versions of record or the final published versions. They should not be cited or distributed as the published version of this manuscript.

BMJ Open is an open access journal and the full, final, typeset and author-corrected version of record of the manuscript is available on our site with no access controls, subscription charges or pay-per-view fees (<http://bmjopen.bmj.com>).

If you have any questions on BMJ Open's open peer review process please email [info.bmjopen@bmj.com](mailto:info.bmjopen@bmj.com)

# BMJ Open

## Anaesthetic protocol for paediatric glaucoma examinations - the prospective EyeBIS study protocol

|                               |                                                                                                                                                                                                                                                                                                                                                                                                                                                                                                                                                                                                                                                                                                                                                                                                                                                                                                                                                                                         |
|-------------------------------|-----------------------------------------------------------------------------------------------------------------------------------------------------------------------------------------------------------------------------------------------------------------------------------------------------------------------------------------------------------------------------------------------------------------------------------------------------------------------------------------------------------------------------------------------------------------------------------------------------------------------------------------------------------------------------------------------------------------------------------------------------------------------------------------------------------------------------------------------------------------------------------------------------------------------------------------------------------------------------------------|
| Journal:                      | <i>BMJ Open</i>                                                                                                                                                                                                                                                                                                                                                                                                                                                                                                                                                                                                                                                                                                                                                                                                                                                                                                                                                                         |
| Manuscript ID                 | bmjopen-2020-045906                                                                                                                                                                                                                                                                                                                                                                                                                                                                                                                                                                                                                                                                                                                                                                                                                                                                                                                                                                     |
| Article Type:                 | Protocol                                                                                                                                                                                                                                                                                                                                                                                                                                                                                                                                                                                                                                                                                                                                                                                                                                                                                                                                                                                |
| Date Submitted by the Author: | 15-Oct-2020                                                                                                                                                                                                                                                                                                                                                                                                                                                                                                                                                                                                                                                                                                                                                                                                                                                                                                                                                                             |
| Complete List of Authors:     | Hoffmann, Esther; University Medical Centre of the Johannes Gutenberg University Mainz, Dept. of Ophthalmology<br>Grehn, Franz; University Medical Centre of the Johannes Gutenberg University Mainz, Dept. of Ophthalmology<br>Schuster, Alexander; University Medical Centre of the Johannes Gutenberg University Mainz, Dept. of Ophthalmology<br>Pirlich, Nina; University Medical Centre of the Johannes Gutenberg University Mainz, Dept. of Anaesthesiology<br>Wittenmeier, Eva; University Medical Centre of the Johannes Gutenberg University Mainz, Dept. of Anaesthesiology<br>Mohnke, Katja; University Medical Centre of the Johannes Gutenberg University Mainz, Dept. of Anaesthesiology<br>Maucher, Konrad; University Medical Centre of the Johannes Gutenberg University Mainz, Dept. of Anaesthesiology<br>Schmidtman, Irene; University Medical Centre of the Johannes Gutenberg University Mainz, Institute of Medical Biostatistics, Epidemiology and Informatics |
| Keywords:                     | Anaesthesia in ophthalmology < ANAESTHETICS, Paediatric anaesthesia < ANAESTHETICS, Glaucoma < OPHTHALMOLOGY, Paediatric ophthalmology < OPHTHALMOLOGY                                                                                                                                                                                                                                                                                                                                                                                                                                                                                                                                                                                                                                                                                                                                                                                                                                  |
|                               |                                                                                                                                                                                                                                                                                                                                                                                                                                                                                                                                                                                                                                                                                                                                                                                                                                                                                                                                                                                         |

SCHOLARONE™  
Manuscripts

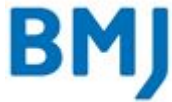

I, the Submitting Author has the right to grant and does grant on behalf of all authors of the Work (as defined in the below author licence), an exclusive licence and/or a non-exclusive licence for contributions from authors who are: i) UK Crown employees; ii) where BMJ has agreed a CC-BY licence shall apply, and/or iii) in accordance with the terms applicable for US Federal Government officers or employees acting as part of their official duties; on a worldwide, perpetual, irrevocable, royalty-free basis to BMJ Publishing Group Ltd ("BMJ") its licensees and where the relevant Journal is co-owned by BMJ to the co-owners of the Journal, to publish the Work in this journal and any other BMJ products and to exploit all rights, as set out in our [licence](#).

The Submitting Author accepts and understands that any supply made under these terms is made by BMJ to the Submitting Author unless you are acting as an employee on behalf of your employer or a postgraduate student of an affiliated institution which is paying any applicable article publishing charge ("APC") for Open Access articles. Where the Submitting Author wishes to make the Work available on an Open Access basis (and intends to pay the relevant APC), the terms of reuse of such Open Access shall be governed by a Creative Commons licence – details of these licences and which [Creative Commons](#) licence will apply to this Work are set out in our licence referred to above.

Other than as permitted in any relevant BMJ Author's Self Archiving Policies, I confirm this Work has not been accepted for publication elsewhere, is not being considered for publication elsewhere and does not duplicate material already published. I confirm all authors consent to publication of this Work and authorise the granting of this licence.

1  
2  
3  
4  
5 **Anaesthetic protocol for paediatric glaucoma examinations - the prospective EyeBIS study**  
6 **protocol**  
7  
8  
9

10  
11 Nina Pirlich<sup>1</sup>, Franz Grehn<sup>3</sup>, Katja Mohnke<sup>1</sup>, Konrad Maucher<sup>1</sup>, Alexander K. Schuster<sup>3</sup>, Eva  
12 Wittenmeier<sup>1</sup>, Irene Schmidtman<sup>2</sup>, Esther M. Hoffmann<sup>3</sup>

13  
14 <sup>1</sup>Department of Anaesthesiology, University Medical Centre of the Johannes Gutenberg-University Mainz, Mainz, Germany

15 <sup>2</sup> Institute of Medical Biostatistics, Epidemiology and Informatics, University Medical Centre of the Johannes Gutenberg-University Mainz,  
16 Mainz, Germany

17 <sup>3</sup>Department of Ophthalmology, University Medical Centre of the Johannes Gutenberg-University Mainz, Mainz, Germany  
18  
19

20 Correspondence to:

21 Esther M. Hoffmann

22 Augenklinik und Poliklinik

23 Universitätsmedizin Mainz

24 Langenbeckstr. 1

25 55131 Mainz

26 Fax: +496131176620

27 Phone: +496131177085  
28  
29

30 [ehoffman@uni-mainz.de](mailto:ehoffman@uni-mainz.de)  
31  
32  
33  
34  
35  
36  
37  
38  
39  
40  
41  
42  
43  
44  
45  
46  
47  
48  
49  
50  
51  
52  
53  
54  
55  
56  
57  
58  
59  
60

**ABSTRACT**

**Introduction** Neonates and young infants with diagnosed or highly suspected glaucoma require an examination under anaesthesia to achieve accurate intraocular pressure (IOP) measurements, since crying or squinting of the eyes may increase IOP and lead to falsely high values. IOP considerably depends on perioperative variables such as haemodynamic factors, anaesthetics, depth of anaesthesia and airway management. The aim of this paper is to report the design and baseline characteristics of EyeBIS, which is a study to develop a standardized anaesthetic protocol for the measurement of IOP under anaesthesia in childhood glaucoma by investigating the link between the magnitude of IOP and depth of anaesthesia.

**Methods and analysis** This is a single centre, prospective cohort study in 100 children with diagnosed or highly suspected glaucoma all undergoing ophthalmological examination under general anaesthesia. 20 children, who undergo general anaesthesia for other reasons, are included as controls. The primary outcome measure is the establishment of a standardized anaesthetic protocol for IOP measurement in childhood glaucoma by assessing the relationship between IOP and depth of anaesthesia (calculated as an electroencephalography (EEG) variable, the bispectral index (BIS)), with special emphasis on airway management and haemodynamic parameters. The dependence of IOP under anaesthesia on airway management and haemodynamic parameters will be described, using a mixed linear model. Restricting the model to patients with healthy eyes, will allow to determine a 95% reference region, in which 95% of the measurement values of patients with healthy eyes can be expected.

**Ethics and dissemination** The study has been approved by the local ethics committee of the Medical Association of the Rhineland-Palatine state, Germany (Approval number: 2019-14207). This work will be disseminated by publication of peer-reviewed manuscripts, presentation in abstract form at national and international scientific meetings and data sharing with other investigators.

**Trial registration number** [ClinicalTrials.gov NCT03972852](https://clinicaltrials.gov/ct2/show/study/NCT03972852)

**Key words:** glaucoma, children, intraocular pressure, anaesthesia, standard protocol

### STRENGTHS AND LIMITATIONS OF THIS STUDY

- EyeBIS will be the first study investigating the measurement of IOP in neonates and young infants taking into account the complexity of multifactorial disruptive perioperative factors.
- Data on normal distribution of paediatric IOP are still lacking.
- Cohorts consist of 100 children each with suspected glaucoma and 20 controls without glaucoma, guaranteeing sufficient numbers for statistical analysis.
- Our anaesthetic protocol may provide a recommendation for other glaucoma centres in the future.
- While EyeBIS is a prospective cohort study, it is only single-centre observational study.
- A limitation is the presence of different glaucoma entities as confounding variables and a potentially different susceptibility of IOP measures by multifactorial perioperative disruptive factors (e.g., lowering of the blood pressure and effect of anaesthetics).

For peer review only

## INTRODUCTION

### Background and rationale

A basic requirement for diagnosis, monitoring and therapy of childhood glaucoma is the accurate measurement of intraocular pressure (IOP). Despite newer less invasive measurement techniques (rebound technology), neonates and young infants still require an examination under anaesthesia (EUA), either under sedation or general anaesthesia.

Squinting and the elevated stress level following the release of catecholamines may lead to falsely high IOP values and subsequently to inadequate therapy. Success rates for correct measurement of IOP in awake children vary between 14% and 60% in the literature.<sup>1 2</sup> As congenital glaucoma damage in newborns and young children is exclusively intraocular pressure (IOP) related (i.e. Descemet tears, optic nerve head damage) accurate measurement of IOP under EUA is crucial.

To date, there are no prospective studies from which detailed recommendations on standardized general anaesthesia in children with glaucoma may be derived.

Perioperative anaesthetics include all inhalation anaesthetics and most centrally depressing drugs such as propofol, benzodiazepines and opioids. They result in a reduction of IOP in both healthy and glaucomatous eyes.<sup>3</sup> The depth of anaesthesia and IOP reduction are correlated. IOP-lowering effects depend on the applied dose and on the time of administration<sup>4-7</sup>. The effects of propofol on IOP are mainly known in adult patients, where IOP reduction is suspected to be associated with the lowering of the mean arterial pressure.<sup>8</sup> Available data on the effect of propofol on IOP in healthy children is inconsistent and there are no data in children with glaucoma.<sup>9</sup> Furthermore, there are no data on the influence of opioids on the IOP of children with glaucoma.

When applying anaesthesia, airway management also has an influence on IOP.<sup>3</sup> Laryngoscopy and intubation can increase IOP substantially, especially when it comes to coughing. However, IOP may rise even without an externally detectable reaction such as a sympatheticotonic cardiovascular mechanism, especially with shallow anaesthesia.<sup>10-12</sup> Laryngeal masks are widely used in adult and paediatric respiratory management and considered safe by paediatric anaesthesiologists in a variety of clinical settings.<sup>13</sup> Compared to endotracheal intubation in children, the use of laryngeal masks is associated with less cardiovascular reactions and a lesser increase in IOP.<sup>14</sup>

The EyeBIS study will be the first study to employ a strict standardized protocol for anaesthesia in children with glaucoma. The study will assess the relationship between depth of anaesthesia and IOP in this population. To determine depth of anaesthesia, the bispectral index (BIS) is used. The index has a range of 0-100 and is a calculated electroencephalography (EEG) variable, used to measure the effects of anaesthetics. A BIS score below 60 indicates the degree of hypnosis of EUA. Both Schäfer and Hanna have described the need to investigate the relationship between depth of anaesthesia and IOP.<sup>6 15</sup> A correlation between IOP and depth of anaesthesia using BIS in children is already available.<sup>16</sup> The purpose of this manuscript is to report on this protocol in the population described below.

## METHODS AND ANALYSIS

### Study setting and design

The Department of Ophthalmology, University Medical Center Mainz, has developed an expertise in childhood glaucoma diseases. In the years 2016 and 2017, surgery was performed in approximately 80 children. Since the founding of the German Childhood Glaucoma Centre at the University Medical Center Mainz in June 2017, the number of children receiving a glaucoma diagnosis or surgery has increased significantly. The collaboration between paediatric ophthalmologists and paediatric anaesthesiologists has led to an enhanced focus and expertise in this area and identified the necessity to develop a standardized protocol for general anaesthesia while performing IOP measurements. Established and safe anaesthesia regimens have been modified, taking into account various known factors that influence the measurement of IOP.

With the planned study, we would like to evaluate whether reliable and reproducible measurement values can be generated by a standardized protocol. The EyeBIS trial is a prospective, single-centre, non-randomized clinical trial.

### Trial population and eligibility criteria

Children in the age group 6 months to 10 years will be included, when meeting the following criteria: requirement of EUA with a laryngeal mask for a surgical or diagnostic procedure; suspected glaucoma or control children undergoing ocular surgery other than glaucoma surgery (control group); ASA classification 1, 2 or 3; and informed written consent from one of their legal representatives.

Patients will not be included in this trial if they meet one or more of the following criteria: contraindications to the use of a laryngeal mask (e.g., severe infections; tumour or bleeding in the upper airway tract, which might prevent the sufficient placement of the laryngeal mask; if the expected magnitude of ventilation pressure exceeds the upper leakage pressure of the laryngeal mask (40 cm H<sub>2</sub>O); the necessity of a constant tracheal access; patients with a severe gastro-oesophageal reflux; or interference of the laryngeal mask with the surgical approach), or known allergy to propofol or remifentanyl. Eligibility criteria are shown in Figure 1.

### Recruitment and participant timelines

Participant inclusion started in June 2019 in the Childhood Glaucoma Centre at the University Medical Centre, Mainz, Germany. The history and physical examinations of all patients scheduled for surgery were screened preoperatively for predictors of difficult airway, oesophageal reflux and allergies.

Patient will be informed about the study by an investigator. Patients will be included if they require the insertion of a laryngeal mask under general anaesthesia. Informed consent for all paediatric participants will be obtained from one of their legal representatives. This also includes information and consent according to the German Medical Privacy Rules (DSGVO, in analogy to the US Insurance Portability and Accountability Act of 1996 (HIPAA)). Prospective approval of the study will be granted by the local ethics committee of the Medical Association of the Rhineland-Palatine state, Germany (approval number: 2019-14207). The Clinical Trials registration number of the study is ClinicalTrials.gov NCT03972852.

The schedule of study enrolment is shown in Figure 2.

### Intervention

Induction and maintenance of EUA is performed. In the present study, the laryngeal mask Ambu® AuraGain™ (German distribution by Ambu GmbH, Bad Nauheim, Germany) is used, which is a



1  
2  
3 second-generation laryngeal mask with integrated gastric access and the possibility of fiberoptic  
4 intubation.<sup>17</sup> Compression of the cervical vessels through the cuff of laryngeal masks has been  
5 reported in adults.<sup>18</sup> It has not been investigated whether the blockage of a laryngeal mask in  
6 children has an influence on IOP by obstructing the venous return. According to the standard  
7 operating procedures of the Department of Anaesthesiology, a premedication with oral midazolam  
8 (juice) is administered when the patient is collected from the ward. A dosage of 0.5 mg/kg (up to a  
9 maximum dose of 10 mg) is given.  
10  
11

12 Local anaesthetics are applied topically to two possible puncture sites at least 1 h prior to surgery.  
13 Before induction of anaesthesia, intravenous (i.v.) access is established. The child's head is positioned  
14 in a neutral way in a head ring, with the body in a flat back position. To optimize mask ventilation,  
15 the shoulder blades are padded with a rolled-up surgical tissue.  
16  
17

18 The induction and maintenance of EUA is performed by an anaesthesiologist, specifically educated in  
19 anaesthesia for neonates and young infants. Before initiating the EUA, pulse oximetry monitoring,  
20 ECG, non-invasive blood pressure measurement and the BIS are started.  
21

22 Preoxygenation takes place with a  $\text{FiO}_2$  of 0.8 and a fresh gas flow of 7 l/min.  
23

24 As soon as the BIS measurement starts, the BIS value and an initial blood pressure value is noted.  
25

26 If it is possible to establish i.v. access, an initial propofol bolus of 2-4 mg/kg body weight is applied.  
27 The children are breathing spontaneously. When the oxygen saturation drops below 90%, a  
28 ventilation via a face mask takes place.  
29

30 The schedule of interventions is also summarized in Figure 2.  
31

32 IOP measurements take place during different depths of anaesthesia. A first IOP measurement is  
33 performed when sufficient sedation for IOP measurement after titrated propofol application (2-4  
34 mg/kg or more if necessary) is achieved. A second IOP measurement is carried out 60 s after  
35 placement of the laryngeal mask to avoid a potentially falsely high IOP value due to a direct  
36 sympathetic reaction caused by the laryngeal mask placement. Then, a third IOP measurement is  
37 taken after a break of 60 s directly after blockage of the cuff of the laryngeal mask (60 cmH<sub>2</sub>O).  
38  
39

40 IOP measurement of each eye is performed with the iCare® PRO tonometer followed by a  
41 measurement with the Perkins applanation tonometer after a one-minute waiting time to avoid  
42 potential influence of repetitive measurements on IOP.  
43

44 Central corneal thickness (CCT) has an influence on IOP measurement in adults and children and is  
45 measured in this study.<sup>19</sup> CCT has also been shown to be a relevant factor in the evaluation of  
46 childhood glaucoma in many studies and appears to result in significant differences in the  
47 measurement of IOP, depending on the device used.<sup>20</sup> This is why two different devices are used in  
48 this study. All IOP measurements are performed by one of four expert study investigators.  
49  
50

51 The Perkins Mk3 is available for measuring IOP. The Perkins Mk3 is a mobile, battery-powered  
52 applanation tonometer, which consists of the following components: a forehead support for correct  
53 placement, a handgrip for the examiner, a LED light source with a blue filter, a biprism and a force  
54 transducer. The force transducer measures how much force the examiner must use to flatten the  
55 cornea to a defined circular area of 4.8 mm<sup>2</sup> (diameter 3.06 mm). For the visualization of the edge of  
56 this surface, fluoresceine (a fluorescent dye) is applied in advance to the cornea. In compliant adults  
57 the awake patient is examined after topical application of a local anaesthetic.  
58  
59  
60

1  
2  
3 The system draws on the 1965 prototype developed by Perkins.<sup>21</sup> It has been specifically designed to  
4 measure IOP in patients who cannot adequately sit upright at a standard stationary applanation  
5 tonometer.  
6

7 The iCare® ProTonometer (iCare Finland Oy, 01510 Vantaa, Finland, German distribution by bon  
8 Optic Vertriebsgesellschaft GmbH, Lübeck, Germany) has been available for in-and outpatient as well  
9 as self-tonometry since its certification in 2010. The iCare® PRO Tonometer is a mobile, battery-  
10 operated rebound or induction tonometer, which consists of the following components: a forehead  
11 support for correct placement, a handle for the examiner and a miniaturized measuring head. The  
12 measuring head bounces against the cornea from a short distance in six, very short individual  
13 measurements. Depending on the IOP, the measuring head is slowed down to varying degrees, from  
14 which the device calculates the IOP using magnetic coils. The compliant awake patient does not  
15 require local anaesthesia. Only a few studies have compared the two techniques in children.<sup>22 23</sup>  
16  
17  
18

### 19 **Central corneal thickness measurement**

20 Measurement of central corneal thickness is performed by Tomey AL-3000 (Tomey GmbH, Nurnberg,  
21 Germany). The SP-3000 is an ophthalmic diagnosis instrument which acquires corneal thickness, by  
22 using ultrasonic waves that are transmitted from the ultrasonic oscillator enclosed in the probe. One  
23 measurement is performed in each eye.  
24  
25

26 In addition to IOP measurements, BIS values, blood pressure (including mean arterial pressure), heart  
27 rate and oxygen saturation are documented for each time point of IOP measurement. General  
28 anaesthesia is maintained with a syringe pump of propofol at a rate of 4-5 mg/kg/h and a syringe  
29 pump of remifentanyl with a running rate of 0.3 µg/kg/min. In case an i.v. access is initially not  
30 possible, mask induction of EUA via sevoflurane (4 vol%, flow 7 l/min, FiO<sub>2</sub> 0.8) is performed,  
31 followed by the establishment of an i.v. access.  
32  
33

34 Figure 3 presents all interventions on a time scale.  
35  
36  
37

### 38 **Bispectral Index Monitoring**

39 The study uses the Aspect XP Bispectral Index Monitor (Medtronic Inc, Minneapolis, MN 55432,  
40 USA). It is available for intraclinical brain function monitoring by deriving raw EEG signals from  
41 patients for perioperative or intensive care monitoring, as well as for clinical research.  
42  
43

44 As described in the introduction, the BIS, with a dimension of 0-100, is a calculated EEG variable and  
45 can be used to aid in assessing the effects of anaesthetics. A BIS score below 60 indicates the degree  
46 of hypnosis of general anaesthesia. The measurement is carried out by a sensor fitted for the  
47 paediatric anatomy (BISTM Paediatric Sensor), which is mounted on the forehead of the patient.  
48  
49

50 Data from children who had to undergo mask induction are excluded from the main analysis and  
51 analyzed separately. Criteria to cancel the intervention include an unexpectedly difficult airway, an  
52 unrecoverable laryngeal mask leak, a different need for endotracheal intubation, and circulatory  
53 instability requiring intervention.  
54

### 55 **Outcomes measures**

56 Aim of this paper is to report design and baseline characteristics of EyeBIS, a study to develop a  
57 standardised anaesthetic protocol for the measurement of IOP under general anaesthesia in  
58 childhood glaucoma by investigating the partial correlation between the magnitude of IOP and depth  
59 of anaesthesia adjusting for potential confounders.  
60

1  
2  
3 Secondary outcome measures in future studies include the comparison of two different IOP  
4 measurements methods (applanation tonometry and rebound tonometry), the magnitude of the  
5 paediatric IOP during EUA in relation to cuff pressure of the laryngeal mask, regarding end  
6 expiratory CO<sub>2</sub> pressure, blood pressure and heart frequency and the definition of the normal range  
7 of the paediatric IOP, as well as the correlation of the CCT and IOP (determined by regression of IOP  
8 on CCT).  
9

10  
11 Primary and secondary outcomes are also shown in Figure 1.  
12  
13

## 14 15 **Data collection, management and analysis**

### 16 Data collection and management of the present study

17  
18  
19 For data collection, a paper-based case report form (CRF) was developed and is used for each  
20 patient. In addition to all other documentation, the CRF and the patient's study file belongs to the  
21 source data. The CRF contains information that is requested directly from the patient and thus  
22 cannot be verified on the basis of the patient's study file (screening information and data collected in  
23 the OR).  
24  
25

26 For pseudonymization purposes, every patient is coded with a specific patient number. In addition to  
27 the paper-based form, this study is also documented electronically. For this purpose, all information  
28 from the study file and the CRF are transferred to the computer in a tabular form.  
29  
30

### 31 Access to data

32 Data management of the present study is performed by the main investigator. All electronically  
33 stored data are backed up regularly. The pseudonymity of patients is ensured throughout the  
34 evaluation. All study data, including the electronically recorded data, will be archived and kept for at  
35 least 15 years after completion of the study according to the currently valid ICH Guidelines on Good  
36 Clinical Practice (GCP) E6 (R2). Data are accessible to all participating personnel and monitors. The  
37 database management system is capable of producing accurate and complete copies of the data in  
38 visual form for inspection by government agencies or ethics committees. Enrolled patients and their  
39 authorised representative have been informed about this.  
40  
41

### 42 Monitoring

43 Prior to enrolling patients, the investigators were briefed on the CRF and study protocol. All  
44 documents required for data collection are available in the operating theatre. Each CRF is filled in by  
45 the investigator after the measurements have been performed. The data is then promptly entered  
46 electronically under his supervision. The investigator regularly evaluates the progress of data  
47 collection and study outcomes in order to address any emerging data collection issues at an early  
48 stage. The data monitoring is managed and analysed in accordance with the ICH GCP Guideline E6  
49 (R2) and followed the requirements of German Drug Law.  
50  
51

52 Adverse events will be recorded after patient enrolment. The study will be temporarily interrupted  
53 by the attending investigator at any time on the individual subject, if a serious adverse event is  
54 suspected, which may be associated with IOP measurement or an airway device being used. A  
55 suspected adverse event or adverse reaction will be considered serious when it comes to one of the  
56 following events: death, a life threatening reaction leading to inpatient hospitalization, and a persistent  
57 or significant incapacity or substantial disability of the normal age-adapted life functions. If the  
58 protocol is discontinued as a result of an adverse event, study personnel will document the  
59 circumstances and data leading to the discontinuation of measurement. The principal investigator  
60

1  
2  
3 will inform the local research ethics committee (REC) in case of a severe adverse event following  
4 local standard operating procedures.  
5

6 The Clinical Research Unit of the Department of Anaesthesiology, University Center Mainz inspects  
7 and reviews screening forms and clinical data at regular intervals.  
8

### 9 **Sample size considerations**

10 With the envisaged number of 100 subjects, a single IOP measurement of one eye and parallel  
11 determination of the BIS, the null hypothesis "correlation = 0" can be rejected at the 5% level with  
12 86.5% if the correlation amounts to 0.3. If the actual correlation is 0.35, the power rises to 95%. The  
13 multiple measurements provide additional information, resulting in a power gain. It is not yet  
14 possible to anticipate how strong the correlation between the multiple measurements will be. With  
15 decreasing correlation between repeat measurements power increases and, similarly, the smaller  
16 correlation between IOP and BIS are still detectable with sufficient power.  
17  
18

### 19 **Statistical analysis**

20 For statistical analysis, SAS statistical software will be used. The analysis corresponds to the  
21 CONSORT statement for non-pharmacological interventions.  
22  
23

### 24 **Description of patient group at baseline**

25 The baseline features of patients will be described using absolute numbers (n) and percentages for  
26 categorical variables and the minimum, maximum, mean and standard deviation for normally  
27 distributed variable and as median (IQR) for non-Gaussian variables. The Pearson correlation  
28 coefficient will be used to compare patient specifics between the groups and the baseline.  
29  
30

### 31 **Analysis of the primary outcome**

32 The relationship between the IOP and BIS will be investigated using a mixed linear model. In this, IOP  
33 is the dependent variable, the BIS is the independent variable. Random effects are subject and eye  
34 (of a subject).  
35  
36

### 37 **Analysis of the secondary outcome**

38 To compare the two measurement methods for IOP, applanation tonometry and rebound  
39 tonometry, Bland-Altman diagrams will be created.  
40

41 The dependence of IOP under general anaesthesia on the cuff pressure of the laryngeal mask, the  
42 end tidal CO<sub>2</sub> partial pressure, the blood pressure and the heart rate will also be described by a  
43 mixed linear model, with the variables of interest as covariates and random effects for subject and  
44 eye and adjustment for corneal thickness.  
45

46 For children without glaucoma, a quantile regression will be performed that takes into account the  
47 factors mentioned above. From this, it is possible to deduce standard ranges in which e.g. 90% or  
48 95% of the values of healthy children are expected.  
49

### 50 **Subgroup analysis**

51 Data from children who had to undergo mask induction will be analysed separately.  
52

## 53 **DISCUSSION**

54 Several studies have documented various variables that have an impact on the paediatric IOP [3]. The  
55 weakness of the previously published studies is that none has examined all in a single study setting.  
56 To our current knowledge, the EyeBIS study is the only clinical study of its kind to associate IOP in  
57 100 childhood glaucoma patients and 20 non-glaucoma patients (control group) with the depth of  
58 anaesthesia under the best possible standardized environmental conditions. Due to the exclusivity  
59 and safety of our patient population.  
60

1  
2  
3 In conclusion, if our study will find a partial correlation between BIS and IOP this could lead to more  
4 reliable IOP data in childhood glaucoma examinations under anaesthesia. This protocol could be a  
5 reference standard for children with suspected glaucoma who cannot undergo an examination while  
6 awake. This leads to an improved, more reliable ability to diagnose glaucoma with an earlier therapy,  
7 which overall leads to a significantly better functional outcome for children.  
8  
9

## 10 11 **ETHICS AND DISSEMINATION**

### 12 **Research ethics approval**

13 The requirements of the ICH Guideline for Good Clinical Practice (GCP) E6 of June 1996 and of  
14 CPMP/ICH/135/95 of September 1997 are, in addition to the national laws and the Declaration of  
15 Helsinki (Somerset West 1996), the basis for carrying out this study.  
16

17 All study personnel are obliged to participate in this study according to these guidelines.  
18

### 19 **Consent or assent**

20 Before being included in the study, the study will be verbally and comprehensibly explained to  
21 patient and one of his/her authorized representatives by a clinical study investigator, as required by  
22 German law. He/she will also receive a comprehensively written information sheet. The authorized  
23 representatives will have the opportunity to have an informed discussion with the clinical study  
24 investigator about the study.  
25

26 The clinical study investigator will obtain written consent from the authorized representatives willing  
27 to participate in the trial. The information leaflet and a new execution of the consent document will  
28 be handed over to one of the authorized representatives. Upon request, the patient will receive a  
29 child-friendly version of the information leaflet.  
30

31 The authorised representative may withdraw from the study at any time if he/she is unwilling to  
32 continue in the trial. In this case, the data from a patient who requests full withdrawal will not be  
33 considered in the data analysis.  
34

### 35 **Confidentiality**

36 All original documents will be kept in the clinical research unit for the next 15 years. The study data  
37 will be handled as requested by the German Federal Data Protection Act, which implements the  
38 Directive 95/46/EC on data protection (Data Protection Directive). All original records will be kept on  
39 file at the trial sites or coordinating data managing centre for 15 years. The cleaned electronic trial  
40 database file will be anonymized and kept on file for 15 years.  
41

### 42 **Acknowledgements**

43 The authors would like to thank all involved doctors and nurses of the Department of  
44 Anaesthesiology and Ophthalmology for their great effort and support for this study. They also thank  
45 Patricia Buchholz RPh, PhD for writing support.  
46

### 47 **Author contributions**

48 The study concept and design were conceived by NP, EMH, KoM, IS and EW. NP, EMH and KoM are  
49 conducting screening and data collection. Analysis and interpretation of data will be performed by IS,  
50 NP, EMH, KoM, FG and AKS. KM and NP prepared the first draft of the manuscript. All authors have  
51 provided edits and critiqued the manuscript for intellectual content, as well as have given final  
52 approval for manuscript submission. Results of this study will be part of the doctoral thesis of KoM.  
53  
54  
55  
56  
57  
58  
59  
60

### **Funding**

This research received no specific funding from any source (public, commercial or not-for-profit).

### **Declaration of interests**

Neither the University Medical Centre of the Johannes Gutenberg University, Mainz, nor its employees received any compensation for this study. There is no externally generated funding or competing interests. None of the authors has indicated financial interests or paid fees received in the course of this study. None of the authors has a personal relationship with companies, organizations or individuals that could interfere with this work in an inappropriate manner. Perkins, iCare, Ambu, 3M and Medtronic, whose products are included in this study, played no part in the funding, design, conduct, evaluation or publication of this study.

### **Provenance and peer review**

Not commissioned; externally peer reviewed.

### **Open Access**

This is an Open Access article distributed in accordance with the Creative Commons Attribution Non Commercial (CC BY-NC 4.0) license, which permits others to distribute, remix, adapt, build upon this work non-commercially, and license their derivative works on different terms, provided the original work is properly cited and the use is non-commercial. See: <http://creativecommons.org/licenses/by-nc/4.0/>

© Article author(s) (or their employer(s) unless otherwise stated in the text of the article) 2019. All rights reserved. No commercial use is permitted unless otherwise expressly granted.

The results of this study will be presented at conferences and published in peer reviewed journals

1  
2  
3 **Figure captions**  
4

5 Figure 1:  
6

7 Study flow chart according to American Society of Anaesthesiologists (ASA) with inclusion  
8 and exclusion criteria, as well as outcome measures  
9

10 Figure 2:  
11

12 Schedule of study enrolment and interventions. i.v., intravenous; SpO<sub>2</sub>, oxygen saturation;  
13 ECG, electrocardiography; BIS, bispectral index; IOP, intraocular pressure.  
14

15 Figure 3:  
16

17 EyeBIS worksheet. Detailed layout of all steps on the interventional time scale  
18  
19  
20  
21  
22  
23  
24  
25  
26  
27  
28  
29  
30  
31  
32  
33  
34  
35  
36  
37  
38  
39  
40  
41  
42  
43  
44  
45  
46  
47  
48  
49  
50  
51  
52  
53  
54  
55  
56  
57  
58  
59  
60

## References

1. Sihota R, Tuli D, Dada T, et al. Distribution and determinants of intraocular pressure in a normal pediatric population. *J Pediatr Ophthalmol Strabismus* 2006;43(1):14-8.
2. Oberacher-Velten I, Prasser C, Rochon J, et al. The effects of midazolam on intraocular pressure in children during examination under sedation. *Br J Ophthalmol* 2011;95(8):1102-5.
3. Mikhail M, Sabri K, Levin AV. Effect of anesthesia on intraocular pressure measurement in children. *Surv Ophthalmol* 2017;62(5):648-58.
4. Chan AW, Tetzlaff JM, Gotsche PC, et al. SPIRIT 2013 explanation and elaboration: guidance for protocols of clinical trials. *BMJ* 2013;346:e7586.
5. Montazeri K, Dehghan A, Akbari S. Increase in intraocular pressure is less with propofol and remifentanyl than isoflurane with remifentanyl during cataract surgery: A randomized controlled trial. *Adv Biomed Res* 2015;4:55.
6. Hanna SF, Ahmad F, Pappas AL, et al. The effect of propofol/remifentanyl rapid-induction technique without muscle relaxants on intraocular pressure. *J Clin Anesth* 2010;22(6):437-42.
7. Termuhlen J, Gottschalk A, Eter N, et al. Does general anesthesia have a clinical impact on intraocular pressure in children? *Paediatr Anaesth* 2016;26(9):936-41.
8. Barclay K, Wall T, Wareham K, et al. Intra-ocular pressure changes in patients with glaucoma. Comparison between the laryngeal mask airway and tracheal tube. *Anaesthesia* 1994;49(2):159-62.
9. Deramoudt V, Gaudon M, Malledant Y, et al. [Effects of propofol on intraocular pressure in surgery of strabismus in children]. *Ann Fr Anesth Reanim* 1990;9(1):1-5.
10. Derbyshire DR, Smith G, Achola KJ. Effect of topical lignocaine on the sympathoadrenal responses to tracheal intubation. *Br J Anaesth* 1987;59(3):300-4.
11. Watcha MF, Chu FC, Stevens JL, et al. Intraocular pressure and hemodynamic changes following tracheal intubation in children. *J Clin Anesth* 1991;3(4):310-3.
12. Watcha MF, White PF, Tychsen L, et al. Comparative effects of laryngeal mask airway and endotracheal tube insertion on intraocular pressure in children. *Anesth Analg* 1992;75(3):355-60.
13. Patel A, Clark SR, Schiffmiller M, et al. A survey of practice patterns in the use of laryngeal mask by pediatric anesthesiologists. *Paediatr Anaesth* 2015;25(11):1127-31.
14. Agrawal G, Agarwal M, Taneja S. A randomized comparative study of intraocular pressure and hemodynamic changes on insertion of proseal laryngeal mask airway and conventional tracheal intubation in pediatric patients. *J Anaesthesiol Clin Pharmacol* 2012;28(3):326-9.
15. Schäfer R, Klett J, Auffarth G, et al. Intraocular pressure more reduced during anesthesia with propofol than with sevoflurane: both combined with remifentanyl. *Acta Anaesthesiol Scand* 2002;46(6):703-6.
16. Dominguez A, Garcia-Miguel FJ, Alsina E, et al. Intraocular pressure measurement in children under general anaesthesia with sevoflurane. *Eur J Anaesthesiol* 2009;26(9):801-3.
17. Piepho T, Cavus E, Noppens R, et al. S1 guidelines on airway management : Guideline of the German Society of Anesthesiology and Intensive Care Medicine. *Anaesthesist* 2015;64 Suppl 1:27-40.
18. Lenoir RJ. Venous congestion of the neck; its relation to laryngeal mask cuff pressures. *Br J Anaesth* 2004;93(3):476-7.
19. Lopes JE, Wilson RR, Alvim HS, et al. Central corneal thickness in pediatric glaucoma. *J Pediatr Ophthalmol Strabismus* 2007;44(2):112-7.
20. Levy J, Lifshitz T, Rosen S, et al. Is the tono-pen accurate for measuring intraocular pressure in young children with congenital glaucoma? *J aapos* 2005;9(4):321-5.
21. Perkins ES. Hand-held applanation tonometer. *Br J Ophthalmol* 1965;49(11):591-3.
22. Esmael A, Ismail YM, Elhousseiny AM, et al. Agreement profiles for rebound and applanation tonometry in normal and glaucomatous children. *Eur J Ophthalmol* 2019;29(4):379-85.
23. Nakakura S. Icare(®) rebound tonometers: review of their characteristics and ease of use. *Clin Ophthalmol* 2018;12:1245-53.



1  
2  
3  
4  
5  
6  
7  
8  
9  
10  
11  
12  
13  
14  
15  
16  
17  
18  
19  
20  
21  
22  
23  
24  
25  
26  
27  
28  
29  
30  
31  
32  
33  
34  
35  
36  
37  
38  
39  
40  
41  
42  
43  
44  
45  
46  
47  
48  
49  
50  
51  
52  
53  
54  
55  
56  
57  
58  
59  
60

For peer review only

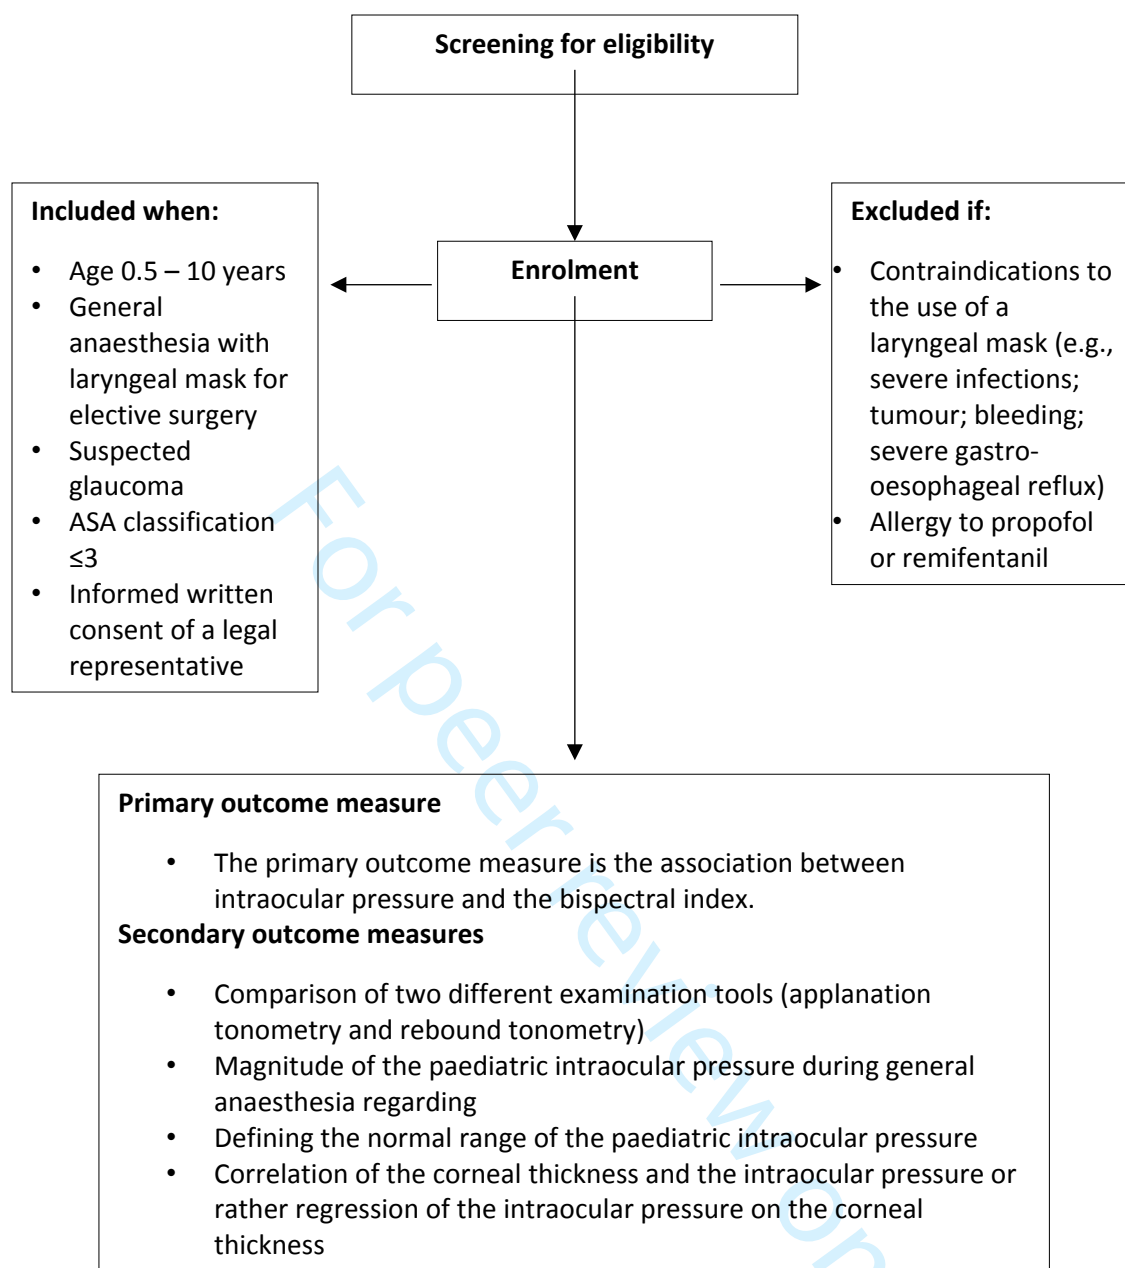

Day 0

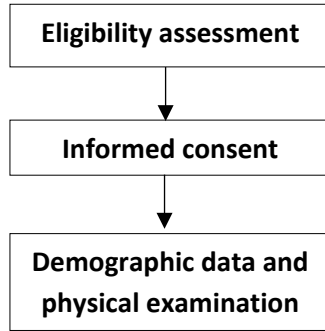

Day 1

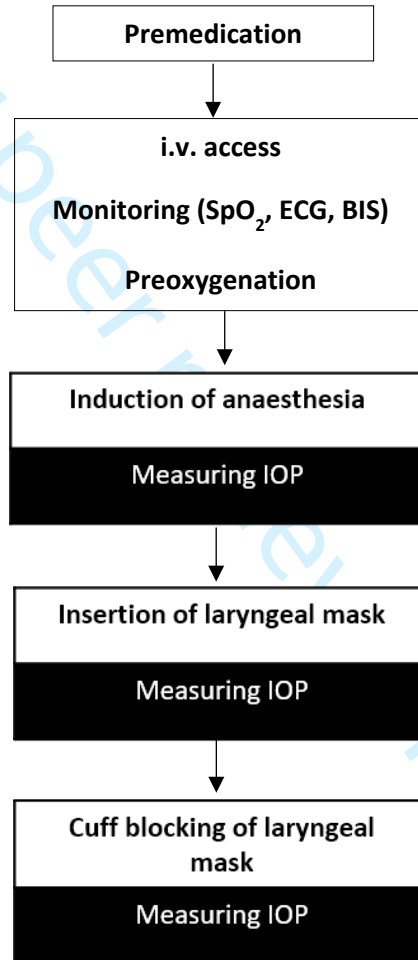

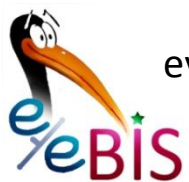

# eyeBIS Worksheet Anaesthesia

## TIVA

Preoxygenation

$FiO_2 = 0.8$   
Fresh gas flow 7 l/min

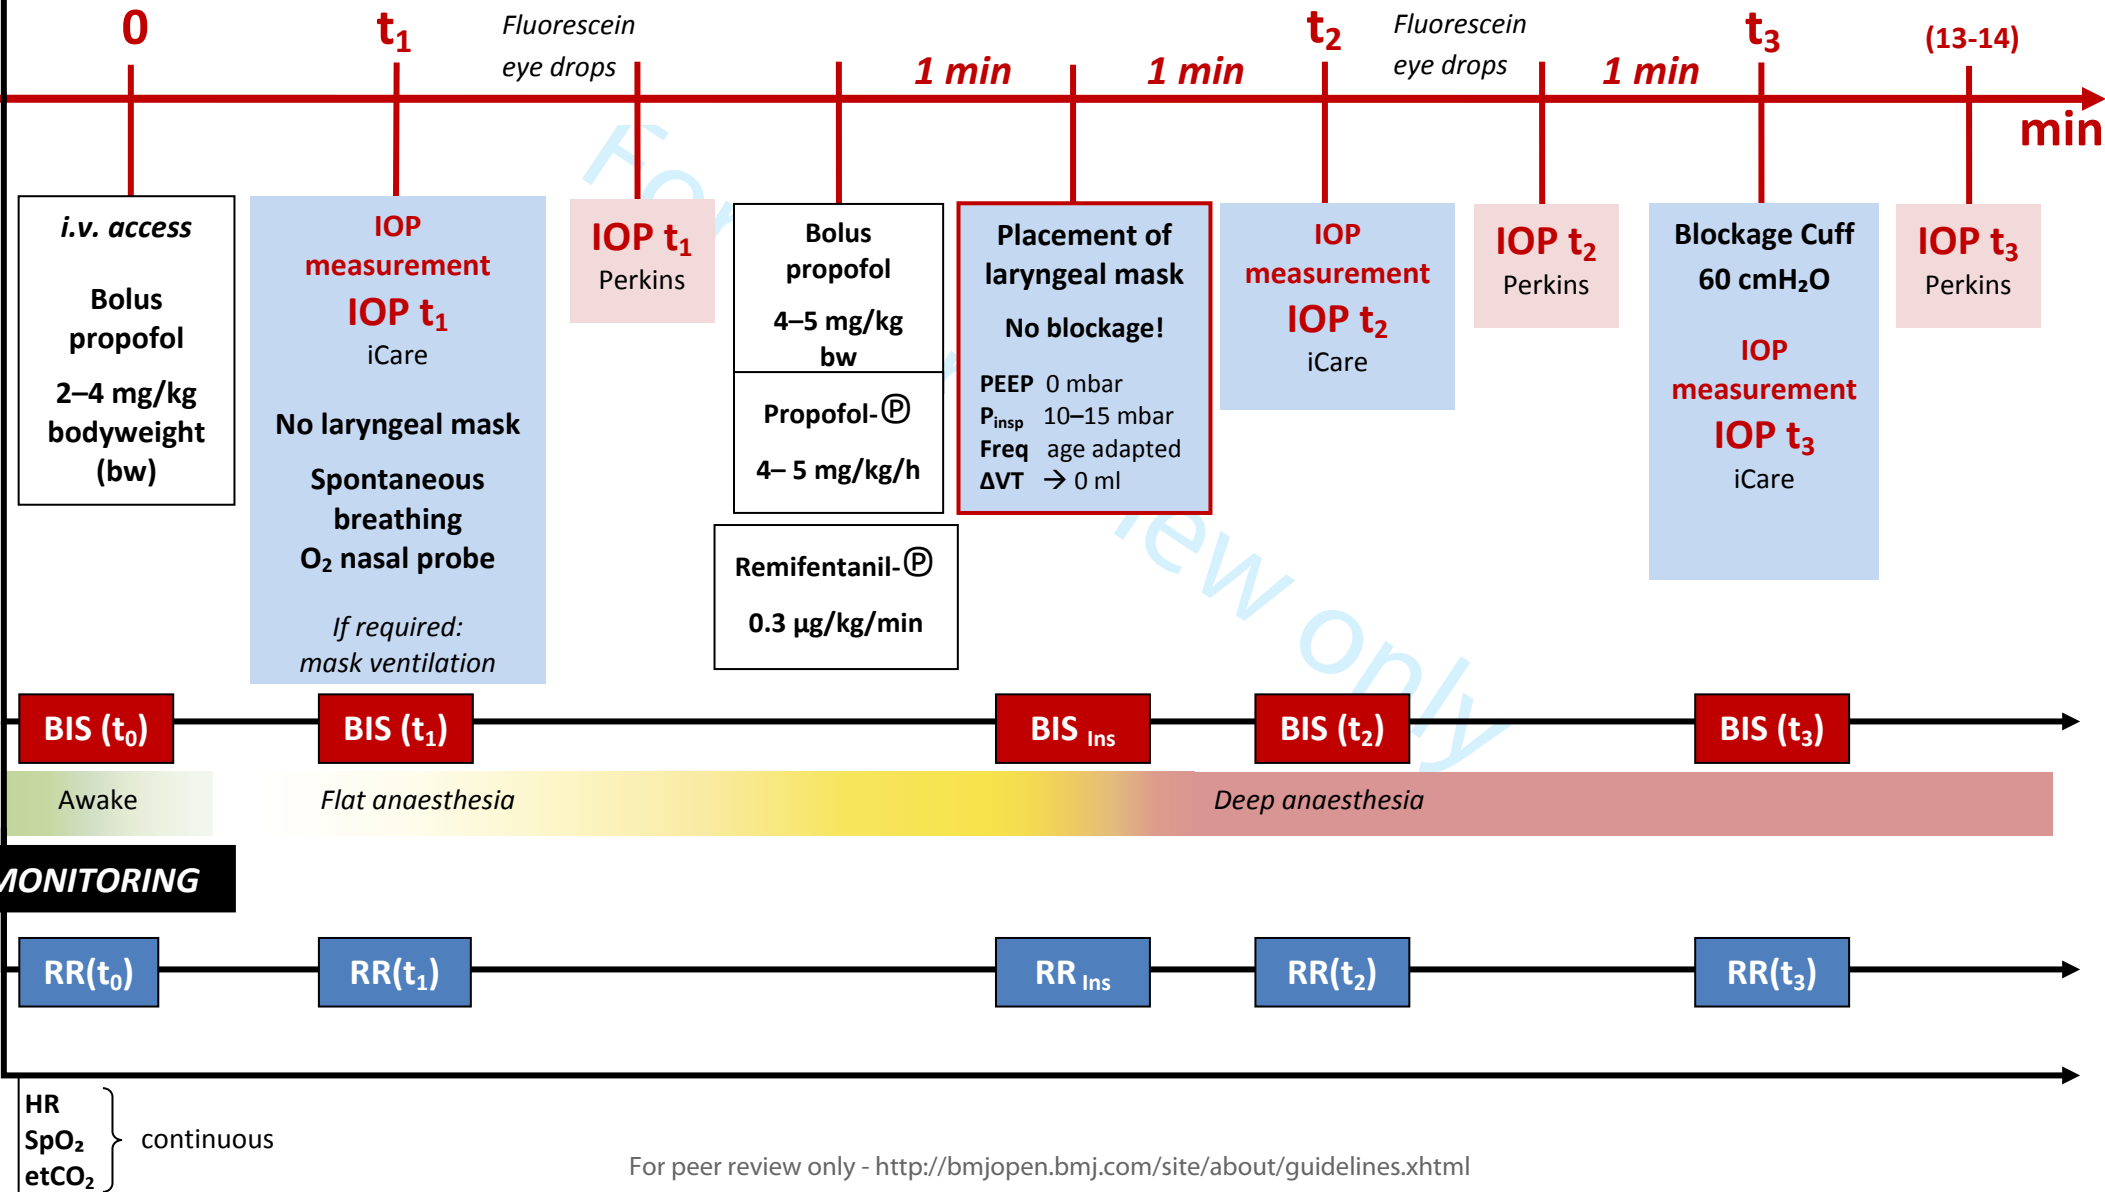

# Reporting checklist for protocol of a clinical trial.

Based on the SPIRIT guidelines.

## Instructions to authors

Complete this checklist by entering the page numbers from your manuscript where readers will find each of the items listed below.

Your article may not currently address all the items on the checklist. Please modify your text to include the missing information. If you are certain that an item does not apply, please write "n/a" and provide a short explanation.

Upload your completed checklist as an extra file when you submit to a journal.

In your methods section, say that you used the SPIRIT reporting guidelines, and cite them as:

Chan A-W, Tetzlaff JM, Gøtzsche PC, Altman DG, Mann H, Berlin J, Dickersin K, Hróbjartsson A, Schulz KF, Parulekar WR, Krleža-Jerić K, Laupacis A, Moher D. SPIRIT 2013 Explanation and Elaboration: Guidance for protocols of clinical trials. *BMJ*. 2013;346:e7586

|                                             |                     | Reporting Item                                                                                               | Page Number |
|---------------------------------------------|---------------------|--------------------------------------------------------------------------------------------------------------|-------------|
| <b>Administrative information</b>           |                     |                                                                                                              |             |
| Title                                       | <a href="#">#1</a>  | Descriptive title identifying the study design, population, interventions, and, if applicable, trial acronym | 1           |
| Trial registration                          | <a href="#">#2a</a> | Trial identifier and registry name. If not yet registered, name of intended registry                         | 2           |
| Trial registration: data set                | <a href="#">#2b</a> | All items from the World Health Organization Trial Registration Data Set                                     | n/a         |
| Protocol version                            | <a href="#">#3</a>  | Date and version identifier                                                                                  | n/a         |
| Funding                                     | <a href="#">#4</a>  | Sources and types of financial, material, and other support                                                  | 11          |
| Roles and responsibilities: contributorship | <a href="#">#5a</a> | Names, affiliations, and roles of protocol contributors                                                      | 11          |

|    |                           |                     |                                                                    |    |
|----|---------------------------|---------------------|--------------------------------------------------------------------|----|
| 1  | Roles and                 | <a href="#">#5b</a> | Name and contact information for the trial sponsor                 | 11 |
| 2  | responsibilities:         |                     |                                                                    |    |
| 3  | sponsor contact           |                     |                                                                    |    |
| 4  | information               |                     |                                                                    |    |
| 5  |                           |                     |                                                                    |    |
| 6  |                           |                     |                                                                    |    |
| 7  |                           |                     |                                                                    |    |
| 8  | Roles and                 | <a href="#">#5c</a> | Role of study sponsor and funders, if any, in study design;        | 11 |
| 9  | responsibilities:         |                     | collection, management, analysis, and interpretation of data;      |    |
| 10 | sponsor and funder        |                     | writing of the report; and the decision to submit the report for   |    |
| 11 |                           |                     | publication, including whether they will have ultimate authority   |    |
| 12 |                           |                     | over any of these activities                                       |    |
| 13 |                           |                     |                                                                    |    |
| 14 |                           |                     |                                                                    |    |
| 15 |                           |                     |                                                                    |    |
| 16 | Roles and                 | <a href="#">#5d</a> | Composition, roles, and responsibilities of the coordinating       | 11 |
| 17 | responsibilities:         |                     | centre, steering committee, endpoint adjudication committee,       |    |
| 18 | committees                |                     | data management team, and other individuals or groups              |    |
| 19 |                           |                     | overseeing the trial, if applicable (see Item 21a for data         |    |
| 20 |                           |                     | monitoring committee)                                              |    |
| 21 |                           |                     |                                                                    |    |
| 22 |                           |                     |                                                                    |    |
| 23 |                           |                     |                                                                    |    |
| 24 | <b>Introduction</b>       |                     |                                                                    |    |
| 25 |                           |                     |                                                                    |    |
| 26 |                           |                     |                                                                    |    |
| 27 | Background and            | <a href="#">#6a</a> | Description of research question and justification for undertaking | 4  |
| 28 | rationale                 |                     | the trial, including summary of relevant studies (published and    |    |
| 29 |                           |                     | unpublished) examining benefits and harms for each intervention    |    |
| 30 |                           |                     |                                                                    |    |
| 31 |                           |                     |                                                                    |    |
| 32 | Background and            | <a href="#">#6b</a> | Explanation for choice of comparators                              | 4  |
| 33 | rationale: choice of      |                     |                                                                    |    |
| 34 | comparators               |                     |                                                                    |    |
| 35 |                           |                     |                                                                    |    |
| 36 |                           |                     |                                                                    |    |
| 37 | Objectives                | <a href="#">#7</a>  | Specific objectives or hypotheses                                  | 4  |
| 38 |                           |                     |                                                                    |    |
| 39 |                           |                     |                                                                    |    |
| 40 | Trial design              | <a href="#">#8</a>  | Description of trial design including type of trial (eg, parallel  | 5  |
| 41 |                           |                     | group, crossover, factorial, single group), allocation ratio, and  |    |
| 42 |                           |                     | framework (eg, superiority, equivalence, non-inferiority,          |    |
| 43 |                           |                     | exploratory)                                                       |    |
| 44 |                           |                     |                                                                    |    |
| 45 |                           |                     |                                                                    |    |
| 46 | <b>Methods:</b>           |                     |                                                                    |    |
| 47 | <b>Participants,</b>      |                     |                                                                    |    |
| 48 | <b>interventions, and</b> |                     |                                                                    |    |
| 49 | <b>outcomes</b>           |                     |                                                                    |    |
| 50 |                           |                     |                                                                    |    |
| 51 |                           |                     |                                                                    |    |
| 52 |                           |                     |                                                                    |    |
| 53 | Study setting             | <a href="#">#9</a>  | Description of study settings (eg, community clinic, academic      | 5  |
| 54 |                           |                     | hospital) and list of countries where data will be collected.      |    |
| 55 |                           |                     | Reference to where list of study sites can be obtained             |    |
| 56 |                           |                     |                                                                    |    |
| 57 |                           |                     |                                                                    |    |
| 58 |                           |                     |                                                                    |    |
| 59 |                           |                     |                                                                    |    |
| 60 |                           |                     |                                                                    |    |

|    |                              |                      |                                                                                                                                                                                                                                                                                                                                                                                |     |
|----|------------------------------|----------------------|--------------------------------------------------------------------------------------------------------------------------------------------------------------------------------------------------------------------------------------------------------------------------------------------------------------------------------------------------------------------------------|-----|
| 1  | Eligibility criteria         | <a href="#">#10</a>  | Inclusion and exclusion criteria for participants. If applicable, eligibility criteria for study centres and individuals who will perform the interventions (eg, surgeons, psychotherapists)                                                                                                                                                                                   | 5   |
| 2  |                              |                      |                                                                                                                                                                                                                                                                                                                                                                                |     |
| 3  |                              |                      |                                                                                                                                                                                                                                                                                                                                                                                |     |
| 4  |                              |                      |                                                                                                                                                                                                                                                                                                                                                                                |     |
| 5  |                              |                      |                                                                                                                                                                                                                                                                                                                                                                                |     |
| 6  | Interventions:               | <a href="#">#11a</a> | Interventions for each group with sufficient detail to allow replication, including how and when they will be administered                                                                                                                                                                                                                                                     | 6   |
| 7  | description                  |                      |                                                                                                                                                                                                                                                                                                                                                                                |     |
| 8  |                              |                      |                                                                                                                                                                                                                                                                                                                                                                                |     |
| 9  |                              |                      |                                                                                                                                                                                                                                                                                                                                                                                |     |
| 10 | Interventions:               | <a href="#">#11b</a> | Criteria for discontinuing or modifying allocated interventions for a given trial participant (eg, drug dose change in response to harms, participant request, or improving / worsening disease)                                                                                                                                                                               | 6   |
| 11 | modifications                |                      |                                                                                                                                                                                                                                                                                                                                                                                |     |
| 12 |                              |                      |                                                                                                                                                                                                                                                                                                                                                                                |     |
| 13 |                              |                      |                                                                                                                                                                                                                                                                                                                                                                                |     |
| 14 |                              |                      |                                                                                                                                                                                                                                                                                                                                                                                |     |
| 15 | Interventions:               | <a href="#">#11c</a> | Strategies to improve adherence to intervention protocols, and any procedures for monitoring adherence (eg, drug tablet return; laboratory tests)                                                                                                                                                                                                                              | 6   |
| 16 | adherence                    |                      |                                                                                                                                                                                                                                                                                                                                                                                |     |
| 17 |                              |                      |                                                                                                                                                                                                                                                                                                                                                                                |     |
| 18 |                              |                      |                                                                                                                                                                                                                                                                                                                                                                                |     |
| 19 |                              |                      |                                                                                                                                                                                                                                                                                                                                                                                |     |
| 20 |                              |                      |                                                                                                                                                                                                                                                                                                                                                                                |     |
| 21 | Interventions:               | <a href="#">#11d</a> | Relevant concomitant care and interventions that are permitted or prohibited during the trial                                                                                                                                                                                                                                                                                  | 6   |
| 22 | concomitant care             |                      |                                                                                                                                                                                                                                                                                                                                                                                |     |
| 23 |                              |                      |                                                                                                                                                                                                                                                                                                                                                                                |     |
| 24 |                              |                      |                                                                                                                                                                                                                                                                                                                                                                                |     |
| 25 | Outcomes                     | <a href="#">#12</a>  | Primary, secondary, and other outcomes, including the specific measurement variable (eg, systolic blood pressure), analysis metric (eg, change from baseline, final value, time to event), method of aggregation (eg, median, proportion), and time point for each outcome. Explanation of the clinical relevance of chosen efficacy and harm outcomes is strongly recommended | 9   |
| 26 |                              |                      |                                                                                                                                                                                                                                                                                                                                                                                |     |
| 27 |                              |                      |                                                                                                                                                                                                                                                                                                                                                                                |     |
| 28 |                              |                      |                                                                                                                                                                                                                                                                                                                                                                                |     |
| 29 |                              |                      |                                                                                                                                                                                                                                                                                                                                                                                |     |
| 30 |                              |                      |                                                                                                                                                                                                                                                                                                                                                                                |     |
| 31 |                              |                      |                                                                                                                                                                                                                                                                                                                                                                                |     |
| 32 |                              |                      |                                                                                                                                                                                                                                                                                                                                                                                |     |
| 33 |                              |                      |                                                                                                                                                                                                                                                                                                                                                                                |     |
| 34 | Participant timeline         | <a href="#">#13</a>  | Time schedule of enrolment, interventions (including any run-ins and washouts), assessments, and visits for participants. A schematic diagram is highly recommended (see Figure)                                                                                                                                                                                               | 5   |
| 35 |                              |                      |                                                                                                                                                                                                                                                                                                                                                                                |     |
| 36 |                              |                      |                                                                                                                                                                                                                                                                                                                                                                                |     |
| 37 |                              |                      |                                                                                                                                                                                                                                                                                                                                                                                |     |
| 38 |                              |                      |                                                                                                                                                                                                                                                                                                                                                                                |     |
| 39 |                              |                      |                                                                                                                                                                                                                                                                                                                                                                                |     |
| 40 | Sample size                  | <a href="#">#14</a>  | Estimated number of participants needed to achieve study objectives and how it was determined, including clinical and statistical assumptions supporting any sample size calculations                                                                                                                                                                                          | 9   |
| 41 |                              |                      |                                                                                                                                                                                                                                                                                                                                                                                |     |
| 42 |                              |                      |                                                                                                                                                                                                                                                                                                                                                                                |     |
| 43 |                              |                      |                                                                                                                                                                                                                                                                                                                                                                                |     |
| 44 |                              |                      |                                                                                                                                                                                                                                                                                                                                                                                |     |
| 45 | Recruitment                  | <a href="#">#15</a>  | Strategies for achieving adequate participant enrolment to reach target sample size                                                                                                                                                                                                                                                                                            | 5   |
| 46 |                              |                      |                                                                                                                                                                                                                                                                                                                                                                                |     |
| 47 |                              |                      |                                                                                                                                                                                                                                                                                                                                                                                |     |
| 48 |                              |                      |                                                                                                                                                                                                                                                                                                                                                                                |     |
| 49 | <b>Methods: Assignment</b>   |                      |                                                                                                                                                                                                                                                                                                                                                                                |     |
| 50 | <b>of interventions (for</b> |                      |                                                                                                                                                                                                                                                                                                                                                                                |     |
| 51 | <b>controlled trials)</b>    |                      |                                                                                                                                                                                                                                                                                                                                                                                |     |
| 52 |                              |                      |                                                                                                                                                                                                                                                                                                                                                                                |     |
| 53 |                              |                      |                                                                                                                                                                                                                                                                                                                                                                                |     |
| 54 | Allocation: sequence         | <a href="#">#16a</a> | Method of generating the allocation sequence (eg, computer-generated random numbers), and list of any factors for stratification. To reduce predictability of a random sequence, details of any planned restriction (eg, blocking) should be                                                                                                                                   | n/a |
| 55 | generation                   |                      |                                                                                                                                                                                                                                                                                                                                                                                |     |
| 56 |                              |                      |                                                                                                                                                                                                                                                                                                                                                                                |     |
| 57 |                              |                      |                                                                                                                                                                                                                                                                                                                                                                                |     |
| 58 |                              |                      |                                                                                                                                                                                                                                                                                                                                                                                |     |
| 59 |                              |                      |                                                                                                                                                                                                                                                                                                                                                                                |     |
| 60 |                              |                      |                                                                                                                                                                                                                                                                                                                                                                                |     |

provided in a separate document that is unavailable to those who enrol participants or assign interventions

|                                                           |                      |                                                                                                                                                                                                                                                                                                                                                                                                              |     |
|-----------------------------------------------------------|----------------------|--------------------------------------------------------------------------------------------------------------------------------------------------------------------------------------------------------------------------------------------------------------------------------------------------------------------------------------------------------------------------------------------------------------|-----|
| Allocation concealment mechanism                          | <a href="#">#16b</a> | Mechanism of implementing the allocation sequence (eg, central telephone; sequentially numbered, opaque, sealed envelopes), describing any steps to conceal the sequence until interventions are assigned                                                                                                                                                                                                    | n/a |
| Allocation: implementation                                | <a href="#">#16c</a> | Who will generate the allocation sequence, who will enrol participants, and who will assign participants to interventions                                                                                                                                                                                                                                                                                    | 5   |
| Blinding (masking)                                        | <a href="#">#17a</a> | Who will be blinded after assignment to interventions (eg, trial participants, care providers, outcome assessors, data analysts), and how                                                                                                                                                                                                                                                                    | n/a |
| Blinding (masking): emergency unblinding                  | <a href="#">#17b</a> | If blinded, circumstances under which unblinding is permissible, and procedure for revealing a participant's allocated intervention during the trial                                                                                                                                                                                                                                                         | n/a |
| <b>Methods: Data collection, management, and analysis</b> |                      |                                                                                                                                                                                                                                                                                                                                                                                                              |     |
| Data collection plan                                      | <a href="#">#18a</a> | Plans for assessment and collection of outcome, baseline, and other trial data, including any related processes to promote data quality (eg, duplicate measurements, training of assessors) and a description of study instruments (eg, questionnaires, laboratory tests) along with their reliability and validity, if known. Reference to where data collection forms can be found, if not in the protocol | 8   |
| Data collection plan: retention                           | <a href="#">#18b</a> | Plans to promote participant retention and complete follow-up, including list of any outcome data to be collected for participants who discontinue or deviate from intervention protocols                                                                                                                                                                                                                    | 8   |
| Data management                                           | <a href="#">#19</a>  | Plans for data entry, coding, security, and storage, including any related processes to promote data quality (eg, double data entry; range checks for data values). Reference to where details of data management procedures can be found, if not in the protocol                                                                                                                                            | 8   |
| Statistics: outcomes                                      | <a href="#">#20a</a> | Statistical methods for analysing primary and secondary outcomes. Reference to where other details of the statistical analysis plan can be found, if not in the protocol                                                                                                                                                                                                                                     | 9   |



|    |                            |                      |                                                                    |     |
|----|----------------------------|----------------------|--------------------------------------------------------------------|-----|
| 1  | Statistics: additional     | <a href="#">#20b</a> | Methods for any additional analyses (eg, subgroup and adjusted     | 9   |
| 2  | analyses                   |                      | analyses)                                                          |     |
| 3  |                            |                      |                                                                    |     |
| 4  | Statistics: analysis       | <a href="#">#20c</a> | Definition of analysis population relating to protocol non-        | 9   |
| 5  | population and missing     |                      | adherence (eg, as randomised analysis), and any statistical        |     |
| 6  | data                       |                      | methods to handle missing data (eg, multiple imputation)           |     |
| 7  |                            |                      |                                                                    |     |
| 8  |                            |                      |                                                                    |     |
| 9  |                            |                      |                                                                    |     |
| 10 | <b>Methods: Monitoring</b> |                      |                                                                    |     |
| 11 |                            |                      |                                                                    |     |
| 12 | Data monitoring:           | <a href="#">#21a</a> | Composition of data monitoring committee (DMC); summary of         | 8   |
| 13 | formal committee           |                      | its role and reporting structure; statement of whether it is       |     |
| 14 |                            |                      | independent from the sponsor and competing interests; and          |     |
| 15 |                            |                      | reference to where further details about its charter can be found, |     |
| 16 |                            |                      | if not in the protocol. Alternatively, an explanation of why a     |     |
| 17 |                            |                      | DMC is not needed                                                  |     |
| 18 |                            |                      |                                                                    |     |
| 19 |                            |                      |                                                                    |     |
| 20 |                            |                      |                                                                    |     |
| 21 |                            |                      |                                                                    |     |
| 22 | Data monitoring:           | <a href="#">#21b</a> | Description of any interim analyses and stopping guidelines,       | n/a |
| 23 | interim analysis           |                      | including who will have access to these interim results and make   |     |
| 24 |                            |                      | the final decision to terminate the trial                          |     |
| 25 |                            |                      |                                                                    |     |
| 26 |                            |                      |                                                                    |     |
| 27 | Harms                      | <a href="#">#22</a>  | Plans for collecting, assessing, reporting, and managing solicited | 9   |
| 28 |                            |                      | and spontaneously reported adverse events and other unintended     |     |
| 29 |                            |                      | effects of trial interventions or trial conduct                    |     |
| 30 |                            |                      |                                                                    |     |
| 31 |                            |                      |                                                                    |     |
| 32 |                            |                      |                                                                    |     |
| 33 | Auditing                   | <a href="#">#23</a>  | Frequency and procedures for auditing trial conduct, if any, and   | 9   |
| 34 |                            |                      | whether the process will be independent from investigators and     |     |
| 35 |                            |                      | the sponsor                                                        |     |
| 36 |                            |                      |                                                                    |     |
| 37 |                            |                      |                                                                    |     |
| 38 | <b>Ethics and</b>          |                      |                                                                    |     |
| 39 | <b>dissemination</b>       |                      |                                                                    |     |
| 40 |                            |                      |                                                                    |     |
| 41 |                            |                      |                                                                    |     |
| 42 | Research ethics            | <a href="#">#24</a>  | Plans for seeking research ethics committee / institutional review | 5   |
| 43 | approval                   |                      | board (REC / IRB) approval                                         |     |
| 44 |                            |                      |                                                                    |     |
| 45 |                            |                      |                                                                    |     |
| 46 | Protocol amendments        | <a href="#">#25</a>  | Plans for communicating important protocol modifications (eg,      | n/a |
| 47 |                            |                      | changes to eligibility criteria, outcomes, analyses) to relevant   |     |
| 48 |                            |                      | parties (eg, investigators, REC / IRBs, trial participants, trial  |     |
| 49 |                            |                      | registries, journals, regulators)                                  |     |
| 50 |                            |                      |                                                                    |     |
| 51 |                            |                      |                                                                    |     |
| 52 |                            |                      |                                                                    |     |
| 53 | Consent or assent          | <a href="#">#26a</a> | Who will obtain informed consent or assent from potential trial    | 10  |
| 54 |                            |                      | participants or authorised surrogates, and how (see Item 32)       |     |
| 55 |                            |                      |                                                                    |     |
| 56 |                            |                      |                                                                    |     |
| 57 |                            |                      |                                                                    |     |
| 58 |                            |                      |                                                                    |     |
| 59 |                            |                      |                                                                    |     |
| 60 |                            |                      |                                                                    |     |

|    |                          |                      |                                                                      |     |
|----|--------------------------|----------------------|----------------------------------------------------------------------|-----|
| 1  | Consent or assent:       | <a href="#">#26b</a> | Additional consent provisions for collection and use of              | 10  |
| 2  | ancillary studies        |                      | participant data and biological specimens in ancillary studies, if   |     |
| 3  |                          |                      | applicable                                                           |     |
| 4  |                          |                      |                                                                      |     |
| 5  |                          |                      |                                                                      |     |
| 6  | Confidentiality          | <a href="#">#27</a>  | How personal information about potential and enrolled                | 11  |
| 7  |                          |                      | participants will be collected, shared, and maintained in order to   |     |
| 8  |                          |                      | protect confidentiality before, during, and after the trial          |     |
| 9  |                          |                      |                                                                      |     |
| 10 |                          |                      |                                                                      |     |
| 11 | Declaration of interests | <a href="#">#28</a>  | Financial and other competing interests for principal investigators  | 11  |
| 12 |                          |                      | for the overall trial and each study site                            |     |
| 13 |                          |                      |                                                                      |     |
| 14 |                          |                      |                                                                      |     |
| 15 | Data access              | <a href="#">#29</a>  | Statement of who will have access to the final trial dataset, and    | 8   |
| 16 |                          |                      | disclosure of contractual agreements that limit such access for      |     |
| 17 |                          |                      | investigators                                                        |     |
| 18 |                          |                      |                                                                      |     |
| 19 |                          |                      |                                                                      |     |
| 20 | Ancillary and post trial | <a href="#">#30</a>  | Provisions, if any, for ancillary and post-trial care, and for       | n/a |
| 21 | care                     |                      | compensation to those who suffer harm from trial participation       |     |
| 22 |                          |                      |                                                                      |     |
| 23 |                          |                      |                                                                      |     |
| 24 | Dissemination policy:    | <a href="#">#31a</a> | Plans for investigators and sponsor to communicate trial results     | n/a |
| 25 | trial results            |                      | to participants, healthcare professionals, the public, and other     |     |
| 26 |                          |                      | relevant groups (eg, via publication, reporting in results           |     |
| 27 |                          |                      | databases, or other data sharing arrangements), including any        |     |
| 28 |                          |                      | publication restrictions                                             |     |
| 29 |                          |                      |                                                                      |     |
| 30 |                          |                      |                                                                      |     |
| 31 |                          |                      |                                                                      |     |
| 32 |                          |                      |                                                                      |     |
| 33 | Dissemination policy:    | <a href="#">#31b</a> | Authorship eligibility guidelines and any intended use of            | 11  |
| 34 | authorship               |                      | professional writers                                                 |     |
| 35 |                          |                      |                                                                      |     |
| 36 |                          |                      |                                                                      |     |
| 37 | Dissemination policy:    | <a href="#">#31c</a> | Plans, if any, for granting public access to the full protocol,      | n/a |
| 38 | reproducible research    |                      | participant-level dataset, and statistical code                      |     |
| 39 |                          |                      |                                                                      |     |
| 40 |                          |                      |                                                                      |     |
| 41 | <b>Appendices</b>        |                      |                                                                      |     |
| 42 |                          |                      |                                                                      |     |
| 43 | Informed consent         | <a href="#">#32</a>  | Model consent form and other related documentation given to          | n/a |
| 44 | materials                |                      | participants and authorised surrogates                               |     |
| 45 |                          |                      |                                                                      |     |
| 46 |                          |                      |                                                                      |     |
| 47 | Biological specimens     | <a href="#">#33</a>  | Plans for collection, laboratory evaluation, and storage of          | n/a |
| 48 |                          |                      | biological specimens for genetic or molecular analysis in the        |     |
| 49 |                          |                      | current trial and for future use in ancillary studies, if applicable |     |
| 50 |                          |                      |                                                                      |     |
| 51 |                          |                      |                                                                      |     |

The SPIRIT checklist is distributed under the terms of the Creative Commons Attribution License CC-BY-ND 3.0. This checklist was completed on 14. September 2020 using <https://www.goodreports.org/>, a tool made by the [EQUATOR Network](#) in collaboration with [Penelope.ai](#)

# BMJ Open

## Anaesthetic protocol for paediatric glaucoma examinations - the prospective EyeBIS study protocol

|                                 |                                                                                                                                                                                                                                                                                                                                                                                                                                                                                                                                                                                                                                                                                                                                                                                                                                                                                                                                                                                         |
|---------------------------------|-----------------------------------------------------------------------------------------------------------------------------------------------------------------------------------------------------------------------------------------------------------------------------------------------------------------------------------------------------------------------------------------------------------------------------------------------------------------------------------------------------------------------------------------------------------------------------------------------------------------------------------------------------------------------------------------------------------------------------------------------------------------------------------------------------------------------------------------------------------------------------------------------------------------------------------------------------------------------------------------|
| Journal:                        | <i>BMJ Open</i>                                                                                                                                                                                                                                                                                                                                                                                                                                                                                                                                                                                                                                                                                                                                                                                                                                                                                                                                                                         |
| Manuscript ID                   | bmjopen-2020-045906.R1                                                                                                                                                                                                                                                                                                                                                                                                                                                                                                                                                                                                                                                                                                                                                                                                                                                                                                                                                                  |
| Article Type:                   | Protocol                                                                                                                                                                                                                                                                                                                                                                                                                                                                                                                                                                                                                                                                                                                                                                                                                                                                                                                                                                                |
| Date Submitted by the Author:   | 14-Jul-2021                                                                                                                                                                                                                                                                                                                                                                                                                                                                                                                                                                                                                                                                                                                                                                                                                                                                                                                                                                             |
| Complete List of Authors:       | Pirlich, Nina; University Medical Centre of the Johannes Gutenberg University Mainz, Dept. of Anaesthesiology<br>Grehn, Franz; University Medical Centre of the Johannes Gutenberg University Mainz, Dept. of Ophthalmology<br>Mohnke, Katja; University Medical Centre of the Johannes Gutenberg University Mainz, Dept. of Anaesthesiology<br>Maucher, Konrad; University Medical Centre of the Johannes Gutenberg University Mainz, Dept. of Anaesthesiology<br>Schuster, Alexander; University Medical Centre of the Johannes Gutenberg University Mainz, Dept. of Ophthalmology<br>Wittenmeier, Eva; University Medical Centre of the Johannes Gutenberg University Mainz, Dept. of Anaesthesiology<br>Schmidtman, Irene; University Medical Centre of the Johannes Gutenberg University Mainz, Institute of Medical Biostatistics, Epidemiology and Informatics<br>Hoffmann, Esther; University Medical Centre of the Johannes Gutenberg University Mainz, Dept. of Ophthalmology |
| <b>Primary Subject Heading</b>: | Ophthalmology                                                                                                                                                                                                                                                                                                                                                                                                                                                                                                                                                                                                                                                                                                                                                                                                                                                                                                                                                                           |
| Secondary Subject Heading:      | Anaesthesia, Ophthalmology, Paediatrics, Patient-centred medicine, Research methods                                                                                                                                                                                                                                                                                                                                                                                                                                                                                                                                                                                                                                                                                                                                                                                                                                                                                                     |
| Keywords:                       | Anaesthesia in ophthalmology < ANAESTHETICS, Paediatric anaesthesia < ANAESTHETICS, Glaucoma < OPHTHALMOLOGY, Paediatric ophthalmology < OPHTHALMOLOGY                                                                                                                                                                                                                                                                                                                                                                                                                                                                                                                                                                                                                                                                                                                                                                                                                                  |
|                                 |                                                                                                                                                                                                                                                                                                                                                                                                                                                                                                                                                                                                                                                                                                                                                                                                                                                                                                                                                                                         |

SCHOLARONE™  
Manuscripts

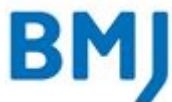

I, the Submitting Author has the right to grant and does grant on behalf of all authors of the Work (as defined in the below author licence), an exclusive licence and/or a non-exclusive licence for contributions from authors who are: i) UK Crown employees; ii) where BMJ has agreed a CC-BY licence shall apply, and/or iii) in accordance with the terms applicable for US Federal Government officers or employees acting as part of their official duties; on a worldwide, perpetual, irrevocable, royalty-free basis to BMJ Publishing Group Ltd ("BMJ") its licensees and where the relevant Journal is co-owned by BMJ to the co-owners of the Journal, to publish the Work in this journal and any other BMJ products and to exploit all rights, as set out in our [licence](#).

The Submitting Author accepts and understands that any supply made under these terms is made by BMJ to the Submitting Author unless you are acting as an employee on behalf of your employer or a postgraduate student of an affiliated institution which is paying any applicable article publishing charge ("APC") for Open Access articles. Where the Submitting Author wishes to make the Work available on an Open Access basis (and intends to pay the relevant APC), the terms of reuse of such Open Access shall be governed by a Creative Commons licence – details of these licences and which [Creative Commons](#) licence will apply to this Work are set out in our licence referred to above.

Other than as permitted in any relevant BMJ Author's Self Archiving Policies, I confirm this Work has not been accepted for publication elsewhere, is not being considered for publication elsewhere and does not duplicate material already published. I confirm all authors consent to publication of this Work and authorise the granting of this licence.

1  
2  
3  
4  
5 **Anaesthetic protocol for paediatric glaucoma examinations - the prospective EyeBIS**  
6 **study protocol**  
7

8  
9 Nina Pirlich<sup>1</sup>, Franz Grehn<sup>3</sup>, Katja Mohnke<sup>1</sup>, Konrad Maucher<sup>1</sup>, Alexander K.  
10 Schuster<sup>3</sup>, Eva Wittenmeier<sup>1</sup>, Irene Schmidtman<sup>2</sup>, Esther M. Hoffmann<sup>3</sup>  
11

12 <sup>1</sup>Department of Anaesthesiology, University Medical Centre of the Johannes Gutenberg-  
13 University Mainz, Mainz, Germany

14 <sup>2</sup> Institute of Medical Biostatistics, Epidemiology and Informatics, University Medical Centre  
15 of the Johannes Gutenberg-University Mainz, Mainz, Germany

16 <sup>3</sup>Department of Ophthalmology, University Medical Centre of the Johannes Gutenberg-  
17 University Mainz, Mainz, Germany  
18  
19  
20  
21

22 Correspondence to:  
23 Esther M. Hoffmann  
24 Augenklinik und Poliklinik  
25 Universitätsmedizin Mainz  
26 Langenbeckstr. 1  
27 55131 Mainz  
28 Fax: +496131176620  
29 Phone: +496131177085  
30  
31

32 [ehoffman@uni-mainz.de](mailto:ehoffman@uni-mainz.de)  
33  
34  
35  
36  
37  
38  
39  
40  
41  
42  
43  
44  
45  
46  
47  
48  
49  
50  
51  
52  
53  
54  
55  
56  
57  
58  
59  
60

## ABSTRACT

**Introduction** Neonates and young infants with diagnosed or highly suspected glaucoma require an examination under anaesthesia to achieve accurate intraocular pressure (IOP) measurements, since crying or squinting of the eyes may increase IOP and lead to falsely high values. IOP considerably depends on perioperative variables such as haemodynamic factors, anaesthetics, depth of anaesthesia and airway management. The aim of this paper is to report the design and baseline characteristics of EyeBIS, which is a study to develop a standardized anaesthetic protocol for the measurement of IOP under anaesthesia in childhood glaucoma by investigating the link between the magnitude of IOP and depth of anaesthesia.

**Methods and analysis** This is a single centre, prospective cohort study in 100 children with diagnosed or highly suspected glaucoma all undergoing ophthalmological examination under general anaesthesia. 20 children, who undergo general anaesthesia for other reasons, are included as controls. The primary outcome measure is the establishment of a standardized anaesthetic protocol for IOP measurement in childhood glaucoma by assessing the relationship between IOP and depth of anaesthesia (calculated as an electroencephalography (EEG) variable, the bispectral index (BIS)), with special emphasis on airway management and haemodynamic parameters. The dependence of IOP under anaesthesia on airway management and haemodynamic parameters will be described, using a mixed linear model. Restricting the model to patients with healthy eyes, will allow to determine a 95% reference region, in which 95% of the measurement values of patients with healthy eyes can be expected.

**Ethics and dissemination** The study has been approved by the local ethics committee of the Medical Association of Rhineland-Palatine (Ethik-Kommission der Landesärztekammer Rheinland-Pfalz), Germany (Approval number: 2019-14207). This work will be disseminated by publication of peer-reviewed manuscripts, presentation in abstract form at national and international scientific meetings and data sharing with other investigators.

**Trial registration number** ClinicalTrials.gov NCT03972852

**Key words:** glaucoma, children, intraocular pressure, anaesthesia, standard protocol

### STRENGTHS AND LIMITATIONS OF THIS STUDY

- EyeBIS will be the first study investigating the measurement of IOP in neonates and young infants taking into account the complexity of multifactorial disruptive perioperative factors.
- EyeBIS will provide data on distribution of paediatric intraocular pressure.
- The developed protocol may provide a recommendation for other glaucoma centres.
- It is only a single-centre observational study.

For peer review only

## INTRODUCTION

### Background and rationale

A basic requirement for diagnosis, monitoring and therapy of childhood glaucoma is the accurate measurement of intraocular pressure (IOP). Despite newer less invasive measurement techniques (rebound technology), neonates and young infants still require an examination under anaesthesia (EUA), either under sedation or general anaesthesia.

Squinting and the elevated stress level following the release of catecholamines may lead to falsely high IOP values and subsequently to inadequate therapy. Success rates for correct measurement of IOP in awake children vary between 14% and 60% in the literature.<sup>1 2</sup> As congenital glaucoma damage in newborns and young children is exclusively intraocular pressure (IOP) related (i.e. Descemet tears, optic nerve head damage) accurate measurement of IOP under EUA is crucial.

To date, there are no prospective studies from which detailed recommendations on standardized general anaesthesia in children with glaucoma may be derived.

Perioperative anaesthetics include all inhalation anaesthetics and most centrally depressing drugs such as propofol, benzodiazepines and opioids. They result in a reduction of IOP in both healthy and glaucomatous eyes.<sup>3</sup> The depth of anaesthesia and IOP reduction are correlated. IOP-lowering effects depend on the applied dose and on the time of administration<sup>4-7</sup>. The effects of propofol on IOP are mainly known in adult patients, where IOP reduction is suspected to be associated with the lowering of the mean arterial pressure.<sup>8</sup> Available data on the effect of propofol on IOP in healthy children is inconsistent and there are no data in children with glaucoma.<sup>9</sup> Furthermore, there are no data on the influence of opioids on the IOP of children with glaucoma.

When applying anaesthesia, airway management also has an influence on IOP.<sup>3</sup> Laryngoscopy and intubation can increase IOP substantially, especially when it comes to coughing. However, IOP may rise even without an externally detectable reaction such as a sympathicotonic cardiovascular mechanism, especially with shallow anaesthesia.<sup>10-12</sup> Laryngeal masks are widely used in adult and paediatric respiratory management and considered safe by paediatric anaesthesiologists in a variety of clinical settings.<sup>13</sup> Compared to endotracheal intubation in children, the use of laryngeal masks is associated with less cardiovascular reactions and a lesser increase in IOP.<sup>14</sup>

The EyeBIS study will be the first study to employ a strict standardized protocol for anaesthesia in children with glaucoma. The study will assess the relationship between depth of anaesthesia and IOP in this population. To determine depth of anaesthesia, the bispectral index (BIS) is used. The index has a range of 0-100 and is a calculated electroencephalography (EEG) variable, used to measure the effects of anaesthetics. A BIS score below 60 indicates the degree of hypnosis of EUA. Both Schäfer and Hanna have described the need to investigate the relationship between depth of anaesthesia and IOP.<sup>6 15</sup> A correlation between IOP and depth of anaesthesia using BIS in children is already available.<sup>16</sup> The purpose of this manuscript is to report on this protocol in the population described below.



## METHODS AND ANALYSIS

### Study setting and design

The Department of Ophthalmology, University Medical Center Mainz, has developed an expertise in childhood glaucoma diseases. In the years 2016 and 2017, surgery was performed in approximately 80 children. Since the founding of the German Childhood Glaucoma Centre at the University Medical Center Mainz in June 2017, the number of children receiving a glaucoma diagnosis or surgery has increased significantly. The collaboration between paediatric ophthalmologists and paediatric anaesthesiologists has led to an enhanced focus and expertise in this area and identified the necessity to develop a standardized protocol for general anaesthesia while performing IOP measurements. Established and safe anaesthesia regimens have been modified, taking into account various known factors that influence the measurement of IOP.

With the planned study, we would like to evaluate whether reliable and reproducible measurement values can be generated by a standardized protocol. The EyeBIS trial is a prospective, single-centre, non-randomized clinical trial.

### Patient and Public Involvement

Patients of this research were first involved in June 2019 by the research team (NP and EMH, and medical students). Eligible patients (see section below) were asked whether they are interested in this study. Inclusion criteria were discussed with parents and children and patients were examined according to the individual standards and SOPs of the Clinic for Anaesthesiology and the Dept. of Ophthalmology. Patients were not involved in the development and design of the study protocol. The public was not involved. Study results will not be disseminated to participants specifically. However, if participants are interested in the results of the research they will receive any information, the manuscript, and published research on this topic in the future.

### Trial population and eligibility criteria

Children in the age group 6 months to 10 years will be included, when meeting the following criteria: requirement of EUA with a laryngeal mask for a surgical or diagnostic procedure; suspected glaucoma or control children undergoing ocular surgery other than glaucoma surgery (control group); ASA classification 1, 2 or 3; and informed written consent from one of their legal representatives.

Patients will not be included in this trial if they meet one or more of the following criteria: contraindications to the use of a laryngeal mask (e.g., severe infections; tumour or bleeding in the upper airway tract, which might prevent the sufficient placement of the laryngeal mask; if the expected magnitude of ventilation pressure exceeds the upper leakage pressure of the laryngeal mask (40 cm H<sub>2</sub>O); the necessity of a constant tracheal access; patients with a severe gastro-oesophageal reflux; or interference of the laryngeal mask with the surgical approach), or known allergy to propofol or remifentanyl. Eligibility criteria are shown in Figure 1.

### Recruitment and participant timelines

Participant inclusion started in June 2019 in the Childhood Glaucoma Centre at the University Medical Centre, Mainz, Germany. The history and physical examinations of all patients scheduled for surgery were screened preoperatively for predictors of difficult airway, oesophageal reflux and allergies.

Patient will be informed about the study by the investigators and medical students (EMH, NP) Patients will be included if they require the insertion of a laryngeal mask under general

1  
2  
3 anaesthesia. Informed consent for all paediatric participants will be obtained from one of their  
4 legal representatives. This also includes information and consent according to the German  
5 Medical Privacy Rules (DSGVO, in analogy to the US Insurance Portability and  
6 Accountability Act of 1996 (HIPAA)). Prospective approval of the study will be granted by the  
7 local ethics committee of the Medical Association of the Rhineland-Palatine state (Ethik-  
8 Kommission der Landesärztekammer Rheinland-Pfalz), Germany (approval number: 2019-  
9 14207). The Clinical Trials registration number of the study is ClinicalTrials.gov  
10 NCT03972852.  
11

12  
13 The schedule of study enrolment is shown in Figure 2.  
14

## 15 16 **Intervention**

17 Induction and maintenance of EUA is performed. In the present study, the laryngeal mask  
18 Ambu® AuraGain™ (German distribution by Ambu GmbH, Bad Nauheim, Germany) is used,  
19 which is a second-generation laryngeal mask with integrated gastric access and the  
20 possibility of fiberoptic intubation.<sup>17</sup> Compression of the cervical vessels through the cuff of  
21 laryngeal masks has been reported in adults.<sup>18</sup> It has not been investigated whether the  
22 blockage of a laryngeal mask in children has an influence on IOP by obstructing the venous  
23 return. According to the standard operating procedures of the Department of  
24 Anaesthesiology, a premedication with oral midazolam (juice) is administered when the  
25 patient is collected from the ward. A dosage of 0.5 mg/kg (up to a maximum dose of 10 mg)  
26 is given.  
27

28  
29 Local anaesthetics are applied topically to two possible puncture sites at least 1 h prior to  
30 surgery. Before induction of anaesthesia, intravenous (i.v.) access is established. The child's  
31 head is positioned in a neutral way in a head ring, with the body in a flat back position. To  
32 optimize mask ventilation, the shoulder blades are padded with a rolled-up surgical tissue.  
33

34  
35 The induction and maintenance of EUA is performed by an anaesthesiologist, specifically  
36 educated in anaesthesia for neonates and young infants. Before initiating the EUA, pulse  
37 oximetry monitoring, ECG, non-invasive blood pressure measurement and the BIS are  
38 started.  
39

40 Preoxygenation takes place with a  $FiO_2$  of 0.8 and a fresh gas flow of 7 l/min.  
41

42 As soon as the BIS measurement starts, the BIS value and an initial blood pressure value is  
43 noted.  
44

45 If it is possible to establish i.v. access, an initial propofol bolus of 2-4 mg/kg body weight is  
46 applied. The children are breathing spontaneously. When the oxygen saturation drops below  
47 90%, a ventilation via a face mask takes place.  
48

49 The schedule of interventions is also summarized in Figure 2.  
50

51 IOP measurements take place during different depths of anaesthesia. Measurement is taken  
52 by one experienced examiner per child (KM, AKS, EMH). A first IOP measurement is  
53 performed when sufficient sedation for IOP measurement after titrated propofol application  
54 (2-4 mg/kg or more if necessary) is achieved. A second IOP measurement is carried out 60 s  
55 after placement of the laryngeal mask to avoid a potentially falsely high IOP value due to a  
56 direct sympathicotonic reaction caused by the laryngeal mask placement. Then, a third IOP  
57 measurement is taken after a break of 60 s directly after blockage of the cuff of the laryngeal  
58 mask (60 cmH<sub>2</sub>O).  
59  
60

IOP measurement of each eye is performed with the iCare® PRO tonometer followed by a measurement with the Perkins applanation tonometer after a one-minute waiting time to avoid potential influence of repetitive measurements on IOP.

Central corneal thickness (CCT) has an influence on IOP measurement in adults and children and is measured in this study.<sup>19</sup> CCT has also been shown to be a relevant factor in the evaluation of childhood glaucoma in many studies and appears to result in significant differences in the measurement of IOP, depending on the device used.<sup>20</sup> This is why two different devices are used in this study. All IOP measurements are performed by one of three expert study investigators.

The Perkins Mk3 is available for measuring IOP. The Perkins Mk3 is a mobile, battery-powered applanation tonometer, which consists of the following components: a forehead support for correct placement, a handgrip for the examiner, a LED light source with a blue filter, a biprism and a force transducer. The force transducer measures how much force the examiner must use to flatten the cornea to a defined circular area of 4.8 mm<sup>2</sup> (diameter 3.06 mm). For the visualization of the edge of this surface, fluoresceine (a fluorescent dye) is applied in advance to the cornea. In compliant adults the awake patient is examined after topical application of a local anaesthetic.

The system draws on the 1965 prototype developed by Perkins.<sup>21</sup> It has been specifically designed to measure IOP in patients who cannot adequately sit upright at a standard stationary applanation tonometer.

The iCare® ProTonometer (iCare Finland Oy, 01510 Vantaa, Finland, German distribution by bon Optic Vertriebsgesellschaft GmbH, Lübeck, Germany) has been available for in- and outpatient as well as self-tonometry since its certification in 2010. The iCare® PRO Tonometer is a mobile, battery-operated rebound or induction tonometer, which consists of the following components: a forehead support for correct placement, a handle for the examiner and a miniaturized measuring head. The measuring head bounces against the cornea from a short distance in six, very short individual measurements. Depending on the IOP, the measuring head is slowed down to varying degrees, from which the device calculates the IOP using magnetic coils. The compliant awake patient does not require local anaesthesia. Only a few studies have compared the two techniques in children.<sup>22 23</sup>

The agreement between the instruments (Perkins applanation tonometry and iCare rebound tonometry) has been evaluated only in a few studies under different conditions than our study. Rebound tonometry has been shown to overestimate IOP in high IOP values.

### **Central corneal thickness measurement**

Measurement of central corneal thickness is performed by Tomey AL-3000 (Tomey GmbH, Nurnberg, Germany). The SP-3000 is an ophthalmic diagnosis instrument which acquires corneal thickness, by using ultrasonic waves that are transmitted from the ultrasonic oscillator enclosed in the probe. One measurement is performed in each eye.

In addition to IOP measurements, BIS values, blood pressure (including mean arterial pressure), heart rate and oxygen saturation are documented for each time point of IOP measurement. General anaesthesia is maintained with a syringe pump of propofol at a rate of 4-5 mg/kg/h and a syringe pump of remifentanil with a running rate of 0.3 µg/kg/min. In case an i.v. access is initially not possible, mask induction of EUA via sevoflurane (4 vol%, flow 7 l/min, FiO<sub>2</sub> 0.8) is performed, followed by the establishment of an i.v. access.

Figure 3 presents all interventions on a time scale.

## Bispectral Index Monitoring

The study uses the Aspect XP Bispectral Index Monitor (Medtronic Inc, Minneapolis, MN 55432, USA). It is available for intraclinical brain function monitoring by deriving raw EEG signals from patients for perioperative or intensive care monitoring, as well as for clinical research.

As described in the introduction, the BIS, with a dimension of 0-100, is a calculated EEG variable and can be used to aid in assessing the effects of anaesthetics. A BIS score below 60 indicates the degree of hypnosis of general anaesthesia. The measurement is carried out by a sensor fitted for the paediatric anatomy (BISTM Paediatric Sensor), which is mounted on the forehead of the patient.

Data from children who had to undergo mask induction are excluded from the main analysis and analyzed separately. Criteria to cancel the intervention include an unexpectedly difficult airway, an unrecoverable laryngeal mask leak, a different need for endotracheal intubation, and circulatory instability requiring intervention.

### Outcomes measures

Primary outcome of the study is the correlation between Bispectral Index (BIS) and intraocular pressure (IOP) under standardised anaesthetic conditions.

Aim of this protocol paper is to report design and baseline characteristics of EyeBIS, a study to develop a standardised anaesthetic protocol for the measurement of IOP under general anaesthesia in childhood glaucoma by investigating the partial correlation between the magnitude of IOP and depth of anaesthesia adjusting for potential confounders.

Secondary outcome measures include the comparison of two different IOP measurements methods (applanation tonometry and rebound tonometry), the magnitude of the paediatric IOP during EUA in relation to cuff pressure of the laryngeal mask, regarding end expiratory CO<sub>2</sub> pressure, blood pressure and heart frequency, effect size of midazolam premedication and the definition of the normal range of the paediatric IOP, as well as the correlation of the CCT and IOP (determined by regression of IOP on CCT).

Primary and secondary outcomes are also shown in Figure 1.

### Data collection, management and analysis

#### Data collection and management of the present study

For data collection, a paper-based case report form (CRF) was developed and is used for each patient. In addition to all other documentation, the CRF and the patient's study file belongs to the source data. The CRF contains information that is requested directly from the patient and thus cannot be verified on the basis of the patient's study file (screening information and data collected in the OR).

For pseudonymization purposes, every patient is coded with a specific patient number. In addition to the paper-based form, this study is also documented electronically. For this purpose, all information from the study file and the CRF are transferred to the computer in a tabular form.

#### Access to data

Data management of the present study is performed by the main investigator. All electronically stored data are backed up regularly. The pseudonymity of patients is ensured throughout the evaluation. All study data, including the electronically recorded data, will be

1  
2  
3 archived and kept for at least 15 years after completion of the study according to the  
4 currently valid ICH Guidelines on Good Clinical Practice (GCP) E6 (R2). Data are accessible  
5 to all participating personnel and monitors. The database management system is capable of  
6 producing accurate and complete copies of the data in visual form for inspection by  
7 government agencies or ethics committees. Enrolled patients and their authorised  
8 representative have been informed about this.  
9

### 10 Monitoring

11 Prior to enrolling patients, the investigators were briefed on the CRF and study protocol. All  
12 documents required for data collection are available in the operating theatre. Each CRF is  
13 filled in by the investigator after the measurements have been performed. The data is then  
14 promptly entered electronically under his supervision. The investigator regularly evaluates  
15 the progress of data collection and study outcomes in order to address any emerging data  
16 collection issues at an early stage. The data monitoring is managed and analysed in  
17 accordance with the ICH GCP Guideline E6 (R2) and followed the requirements of German  
18 Drug Law.  
19

20  
21 Adverse events will be recorded after patient enrolment. The study will be temporarily  
22 interrupted by the attending investigator at any time on the individual subject, if a serious  
23 adverse event is suspected, which may be associated with IOP measurement or an airway  
24 device being used. A suspected adverse event or adverse reaction will be considered  
25 serious when it comes to one of the following events: death, a life threatening reaction leading  
26 to inpatient hospitalization, and a persistent or significant incapacity or substantial disability  
27 of the normal age-adapted life functions. If the protocol is discontinued as a result of an  
28 adverse event, study personnel will document the circumstances and data leading to the  
29 discontinuation of measurement. The principal investigator will inform the local research  
30 ethics committee (REC) in case of a severe adverse event following local standard operating  
31 procedures.  
32  
33

34 The Clinical Research Unit of the Department of Anaesthesiology, University Center Mainz  
35 inspects and reviews screening forms and clinical data at regular intervals.  
36  
37

### 38 Sample size considerations

39 With the envisaged number of 100 subjects, a single IOP measurement of one eye and  
40 parallel determination of the BIS, the null hypothesis "correlation = 0" can be rejected in a  
41 two-sided test at the 5% level with 86.5% power if the correlation amounts to 0.3. If the actual  
42 correlation is 0.35, the power rises to 95%. The multiple measurements provide additional  
43 information, resulting in a power gain. It is not yet possible to anticipate how strong the  
44 correlation between the multiple measurements will be. With decreasing correlation between  
45 repeat measurements power increases and, similarly, also smaller correlation between IOP  
46 and BIS will be detectable for fixed power – how small depends on the yet unknown  
47 correlations.  
48

49 For statistical analysis, SAS statistical software will be used. The analysis corresponds to  
50 STROBE statement for observational studies.  
51  
52  
53

### 54 Description of patient group at baseline

55  
56 The baseline features of patients will be described using absolute numbers (n) and  
57 percentages for categorical variables and the minimum, maximum, mean and standard  
58 deviation for normally distributed variable and as median (IQR) for non-Gaussian variables.  
59 The Pearson correlation coefficient will be used to compare patient specifics between the  
60 groups and the baseline.

### **Analysis of the primary outcome**

The relationship between the IOP and BIS will be investigated using a mixed linear model including measurements at all three time points. In this model, IOP is the dependent variable, the BIS is the main independent variable. Random effects are subject and eye (of a subject). Time per se is not of interest as essentially the depth of anaesthesia measured by BIS at each time point is of interest. Time will be considered by taking repeated measurements into account. Further, we will adjust for age (quantitative), sex, CCT, and cumulative midazolam dose administered until the time of measurement) Eyes within a patient are likely not to be independent, therefore a random patient effect is included in the model.

### **Analysis of the secondary outcome**

To compare the two measurement methods for IOP, applanation tonometry and rebound tonometry, Bland-Altman diagrams will be created.

The dependence of IOP under general anaesthesia on the cuff pressure of the laryngeal mask, the end tidal CO<sub>2</sub> partial pressure, the blood pressure and the heart rate will also be described by a mixed linear model, with the variables mentioned above as covariates and random effects for subject and eye and adjustment for corneal thickness. The general considerations for the primary outcome apply here, too.

For children without glaucoma, a quantile regression will be performed that takes into account the factors mentioned above. From this, it is possible to deduce standard ranges in which e.g. 90% or 95% of the values of healthy children are expected.

### **Subgroup analysis**

Data from children who had to undergo mask induction will be analyzed separately.

## **DISCUSSION**

Several studies have documented various variables that have an impact on the paediatric IOP [3]. The weakness of the previously published studies is that none has examined all in a single study setting. To our current knowledge, the EyeBIS study is the only clinical study of its kind to associate IOP in 100 childhood glaucoma patients and 20 non-glaucoma patients (control group) with the depth of anaesthesia under the best possible standardized environmental conditions. Due to the exclusivity and safety of our patient population.

In conclusion, if our study will find a partial correlation between BIS and IOP this could lead to more reliable IOP data in childhood glaucoma examinations under anaesthesia. This protocol could be a reference standard for children with suspected glaucoma who cannot undergo an examination while awake. This leads to an improved, more reliable ability to diagnose glaucoma with an earlier therapy, which overall leads to a significantly better functional outcome for children.

## **ETHICS AND DISSEMINATION**

### **Research ethics approval**

The requirements of the ICH Guideline for Good Clinical Practice (GCP) E6 of June 1996 and of CPMP/ICH/135/95 of September 1997 are, in addition to the national laws and the Declaration of Helsinki (Somerset West 1996), the basis for carrying out this study.

All study personnel are obliged to participate in this study according to these guidelines.

### **Consent or assent**

Before being included in the study, the study will be verbally and comprehensibly explained to patient and one of his/her authorized representatives by a clinical study investigator, as required by German law. He/she will also receive a comprehensively written information

1  
2  
3 sheet. The authorized representatives will have the opportunity to have an informed  
4 discussion with the clinical study investigator about the study.  
5

6 The clinical study investigator will obtain written consent from the authorized representatives  
7 willing to participate in the trial. The information leaflet and a new execution of the consent  
8 document will be handed over to one of the authorized representatives. Upon request, the  
9 patient will receive a child-friendly version of the information leaflet.  
10

11 The authorised representative may withdraw from the study at any time if he/she is unwilling  
12 to continue in the trial. In this case, the data from a patient who requests full withdrawal will  
13 not be considered in the data analysis.  
14

### 15 **Confidentiality**

16 All original documents will be kept in the clinical research unit for the next 15 years. The  
17 study data will be handled as requested by the German Federal Data Protection Act, which  
18 implements the Directive 95/46/EC on data protection (Data Protection Directive). All original  
19 records will be kept on file at the trial sites or coordinating data managing centre for 15 years.  
20 The cleaned electronic trial database file will be anonymized and kept on file for 15 years.  
21

### 22 **Acknowledgements**

23  
24  
25 The authors would like to thank all involved doctors and nurses of the Department of  
26 Anaesthesiology and Ophthalmology for their great effort and support for this study. They  
27 also thank Patricia Buchholz RPh, PhD for writing support.  
28

### 29 **Author contributions**

30  
31 The study concept and design were conceived by NP, EMH, KM, IS and EW. NP, EMH and  
32 KM are conducting screening and data collection. Analysis and interpretation of data will be  
33 performed by IS, EW, NP, EMH, KM, FG and AKS.  
34

35 KM and NP prepared the first draft of the manuscript. All (NP, FG, EMH, KM, IS, EW, AKS,  
36 KM) authors have provided edits and critiqued the manuscript for intellectual content, as well  
37 as have given final approval for manuscript submission. Results of this study will be part of  
38 the doctoral thesis of KM.  
39  
40

### 41 **Funding**

42  
43  
44 This research received no specific funding from any source (public, commercial or not-for-  
45 profit).  
46

### 47 **Declaration of interests**

48  
49 Neither the University Medical Centre of the Johannes Gutenberg University, Mainz, nor its  
50 employees received any compensation for this study. There is no externally generated  
51 funding or competing interests. None of the authors has indicated financial interests or paid  
52 fees received in the course of this study. None of the authors has a personal relationship with  
53 companies, organizations or individuals that could interfere with this work in an inappropriate  
54 manner. Perkins, iCare, Ambu, 3M and Medtronic, whose products are included in this study,  
55 played no part in the funding, design, conduct, evaluation or publication of this study.  
56

### 57 **Provenance and peer review**

58  
59 Not commissioned; externally peer reviewed.  
60

### **Open Access**

1  
2  
3 This is an Open Access article distributed in accordance with the Creative Commons  
4 Attribution Non Commercial (CC BY-NC 4.0) license, which permits others to distribute,  
5 remix, adapt, build upon this work non-commercially, and license their derivative works on  
6 different terms, provided the original work is properly cited and the use is non-commercial.  
7 See: <http://creativecommons.org/licenses/by-nc/4.0/>  
8

9 © Article author(s) (or their employer(s) unless otherwise stated in the text of the article)  
10 2019. All rights reserved. No commercial use is permitted unless otherwise expressly  
11 granted.  
12

13 The results of this study will be presented at conferences and published in peer reviewed  
14 journals  
15  
16  
17  
18  
19  
20  
21  
22  
23  
24  
25  
26  
27  
28  
29  
30  
31  
32  
33  
34  
35  
36  
37  
38  
39  
40  
41  
42  
43  
44  
45  
46  
47  
48  
49  
50  
51  
52  
53  
54  
55  
56  
57  
58  
59  
60

For peer review only



1  
2  
3 **Figure captions**  
4

5 Figure 1:

6 Study flow chart according to American Society of Anaesthesiologists (ASA) with inclusion  
7 and exclusion criteria, as well as outcome measures  
8

9  
10 Figure 2:

11 Schedule of study enrolment and interventions. i.v., intravenous; SpO<sub>2</sub>, oxygen saturation;  
12 ECG, electrocardiography; BIS, bispectral index; IOP, intraocular pressure.  
13

14 Figure 3:

15  
16 EyeBIS worksheet. Detailed layout of all steps on the interventional time scale  
17  
18  
19  
20  
21  
22  
23  
24  
25  
26  
27  
28  
29  
30  
31  
32  
33  
34  
35  
36  
37  
38  
39  
40  
41  
42  
43  
44  
45  
46  
47  
48  
49  
50  
51  
52  
53  
54  
55  
56  
57  
58  
59  
60

## References

1. Sihota R, Tuli D, Dada T, et al. Distribution and determinants of intraocular pressure in a normal pediatric population. *J Pediatr Ophthalmol Strabismus* 2006;43(1):14-8.
2. Oberacher-Velten I, Prasser C, Rochon J, et al. The effects of midazolam on intraocular pressure in children during examination under sedation. *Br J Ophthalmol* 2011;95(8):1102-5.
3. Mikhail M, Sabri K, Levin AV. Effect of anesthesia on intraocular pressure measurement in children. *Surv Ophthalmol* 2017;62(5):648-58.
4. Chan AW, Tetzlaff JM, Gotsche PC, et al. SPIRIT 2013 explanation and elaboration: guidance for protocols of clinical trials. *BMJ* 2013;346:e7586.
5. Montazeri K, Dehghan A, Akbari S. Increase in intraocular pressure is less with propofol and remifentanyl than isoflurane with remifentanyl during cataract surgery: A randomized controlled trial. *Adv Biomed Res* 2015;4:55.
6. Hanna SF, Ahmad F, Pappas AL, et al. The effect of propofol/remifentanyl rapid-induction technique without muscle relaxants on intraocular pressure. *J Clin Anesth* 2010;22(6):437-42.
7. Termuhlen J, Gottschalk A, Eter N, et al. Does general anesthesia have a clinical impact on intraocular pressure in children? *Paediatr Anaesth* 2016;26(9):936-41.
8. Barclay K, Wall T, Wareham K, et al. Intra-ocular pressure changes in patients with glaucoma. Comparison between the laryngeal mask airway and tracheal tube. *Anaesthesia* 1994;49(2):159-62.
9. Deramoudt V, Gaudon M, Malledant Y, et al. [Effects of propofol on intraocular pressure in surgery of strabismus in children]. *Ann Fr Anesth Reanim* 1990;9(1):1-5.
10. Derbyshire DR, Smith G, Achola KJ. Effect of topical lignocaine on the sympathoadrenal responses to tracheal intubation. *Br J Anaesth* 1987;59(3):300-4.
11. Watcha MF, Chu FC, Stevens JL, et al. Intraocular pressure and hemodynamic changes following tracheal intubation in children. *J Clin Anesth* 1991;3(4):310-3.
12. Watcha MF, White PF, Tychsen L, et al. Comparative effects of laryngeal mask airway and endotracheal tube insertion on intraocular pressure in children. *Anesth Analg* 1992;75(3):355-60.
13. Patel A, Clark SR, Schiffmiller M, et al. A survey of practice patterns in the use of laryngeal mask by pediatric anesthesiologists. *Paediatr Anaesth* 2015;25(11):1127-31.
14. Agrawal G, Agarwal M, Taneja S. A randomized comparative study of intraocular pressure and hemodynamic changes on insertion of proseal laryngeal mask airway and conventional tracheal intubation in pediatric patients. *J Anaesthesiol Clin Pharmacol* 2012;28(3):326-9.
15. Schäfer R, Klett J, Auffarth G, et al. Intraocular pressure more reduced during anesthesia with propofol than with sevoflurane: both combined with remifentanyl. *Acta Anaesthesiol Scand* 2002;46(6):703-6.
16. Dominguez A, Garcia-Miguel FJ, Alsina E, et al. Intraocular pressure measurement in children under general anaesthesia with sevoflurane. *Eur J Anaesthesiol* 2009;26(9):801-3.
17. Piepho T, Cavus E, Noppens R, et al. S1 guidelines on airway management : Guideline of the German Society of Anesthesiology and Intensive Care Medicine. *Anaesthesist* 2015;64 Suppl 1:27-40.
18. Lenoir RJ. Venous congestion of the neck; its relation to laryngeal mask cuff pressures. *Br J Anaesth* 2004;93(3):476-7.
19. Lopes JE, Wilson RR, Alvim HS, et al. Central corneal thickness in pediatric glaucoma. *J Pediatr Ophthalmol Strabismus* 2007;44(2):112-7.
20. Levy J, Lifshitz T, Rosen S, et al. Is the tonopen accurate for measuring intraocular pressure in young children with congenital glaucoma? *J aapos* 2005;9(4):321-5.
21. Perkins ES. Hand-held applanation tonometer. *Br J Ophthalmol* 1965;49(11):591-3.

- 1  
2  
3 22. Esmael A, Ismail YM, Elhousseiny AM, et al. Agreement profiles for rebound and  
4 applanation tonometry in normal and glaucomatous children. *Eur J Ophthalmol*  
5 2019;29(4):379-85.  
6 23. Nakakura S. Icare(®) rebound tonometers: review of their characteristics and ease of  
7 use. *Clin Ophthalmol* 2018;12:1245-53.  
8  
9  
10  
11  
12  
13  
14  
15  
16  
17  
18  
19  
20  
21  
22  
23  
24  
25  
26  
27  
28  
29  
30  
31  
32  
33  
34  
35  
36  
37  
38  
39  
40  
41  
42  
43  
44  
45  
46  
47  
48  
49  
50  
51  
52  
53  
54  
55  
56  
57  
58  
59  
60

For peer review only

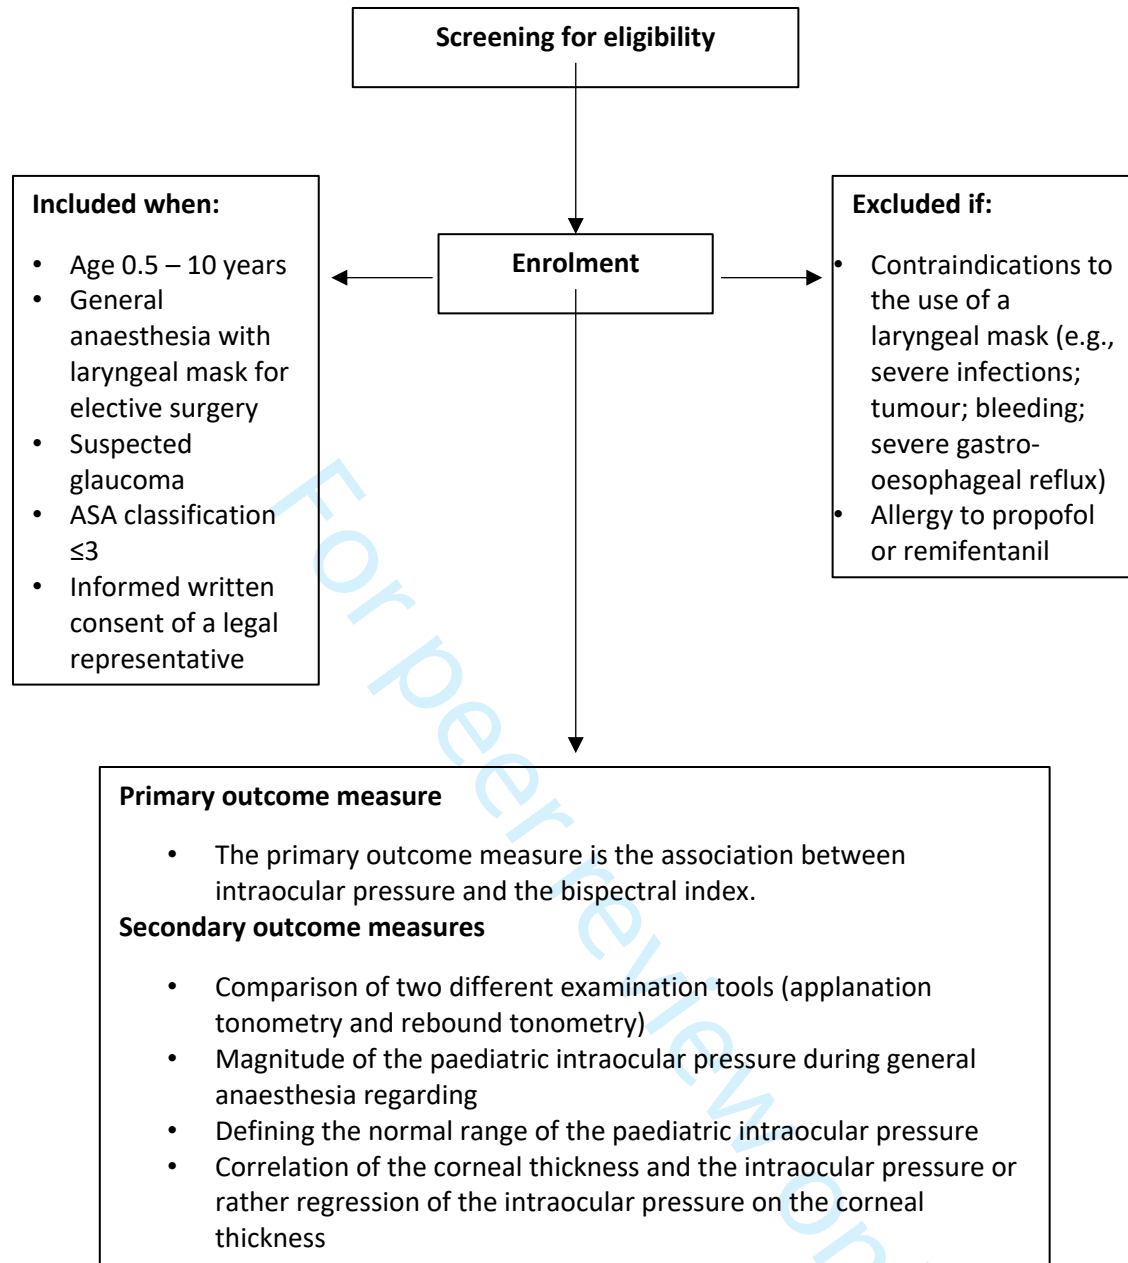

1  
2  
3  
4  
5  
6 Day 0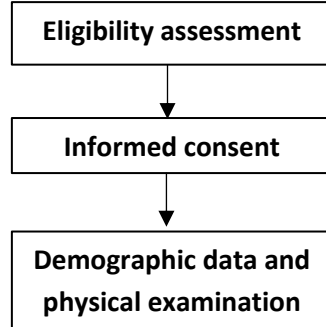7  
8  
9  
10  
11  
12  
13  
14  
15  
16  
17  
18  
19 Day 1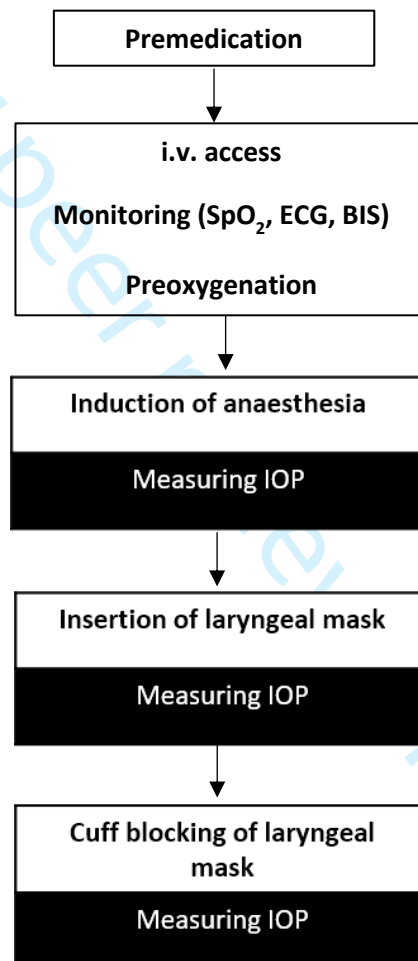

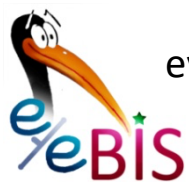

# eyeBIS Worksheet Anaesthesia

## TIVA

Preoxygenation

$FiO_2 = 0.8$   
Fresh gas flow 7 l/min

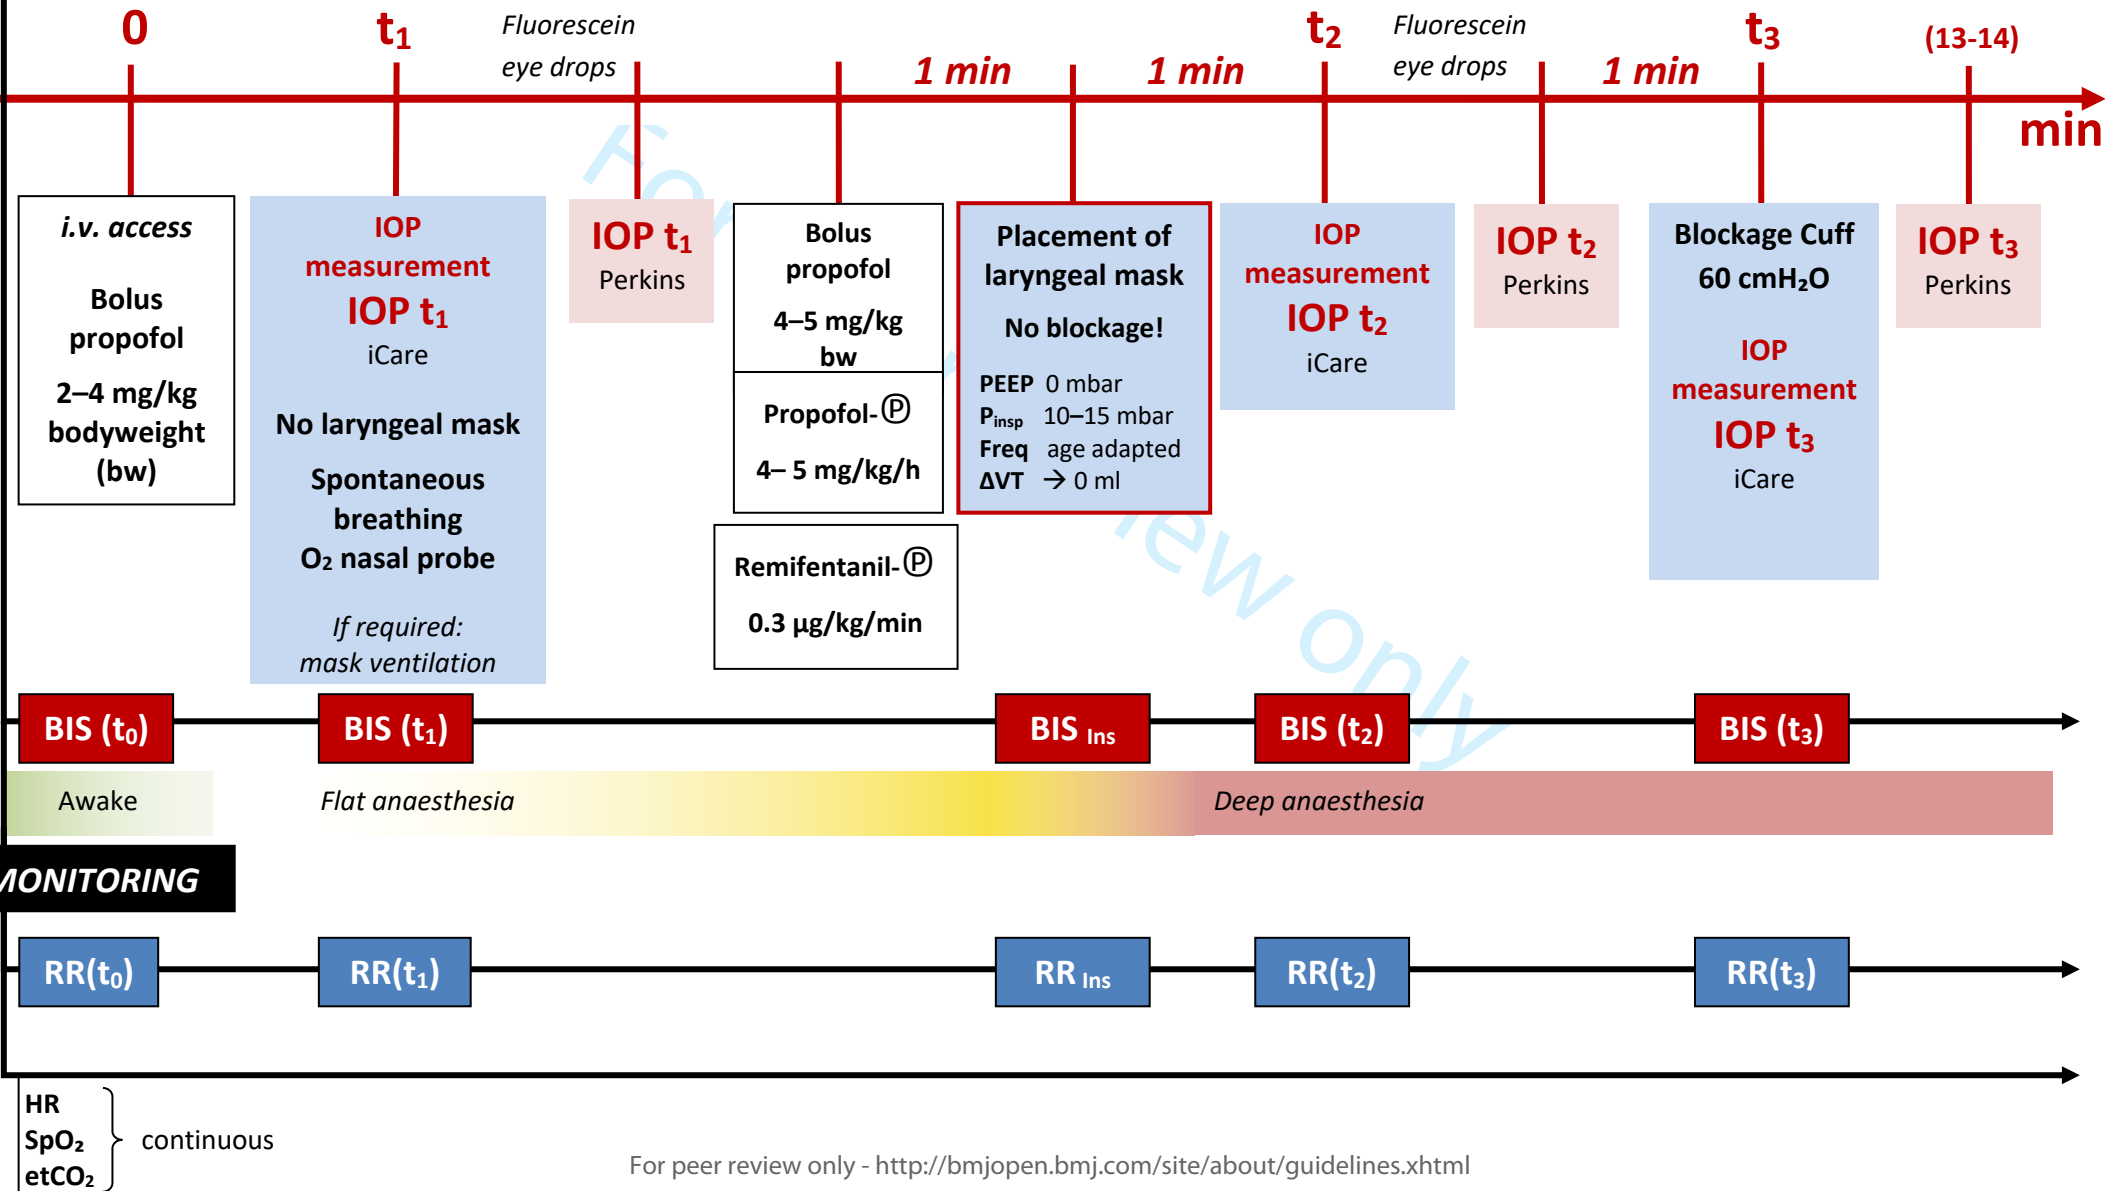

# Reporting checklist for protocol of a clinical trial.

Based on the SPIRIT guidelines.

## Instructions to authors

Complete this checklist by entering the page numbers from your manuscript where readers will find each of the items listed below.

Your article may not currently address all the items on the checklist. Please modify your text to include the missing information. If you are certain that an item does not apply, please write "n/a" and provide a short explanation.

Upload your completed checklist as an extra file when you submit to a journal.

In your methods section, say that you used the SPIRIT reporting guidelines, and cite them as:

Chan A-W, Tetzlaff JM, Gøtzsche PC, Altman DG, Mann H, Berlin J, Dickersin K, Hróbjartsson A, Schulz KF, Parulekar WR, Krleža-Jerić K, Laupacis A, Moher D. SPIRIT 2013 Explanation and Elaboration: Guidance for protocols of clinical trials. *BMJ*. 2013;346:e7586

|                                             |                     | Reporting Item                                                                                               | Page Number |
|---------------------------------------------|---------------------|--------------------------------------------------------------------------------------------------------------|-------------|
| <b>Administrative information</b>           |                     |                                                                                                              |             |
| Title                                       | <a href="#">#1</a>  | Descriptive title identifying the study design, population, interventions, and, if applicable, trial acronym | 1           |
| Trial registration                          | <a href="#">#2a</a> | Trial identifier and registry name. If not yet registered, name of intended registry                         | 2           |
| Trial registration: data set                | <a href="#">#2b</a> | All items from the World Health Organization Trial Registration Data Set                                     | n/a         |
| Protocol version                            | <a href="#">#3</a>  | Date and version identifier                                                                                  | n/a         |
| Funding                                     | <a href="#">#4</a>  | Sources and types of financial, material, and other support                                                  | 11          |
| Roles and responsibilities: contributorship | <a href="#">#5a</a> | Names, affiliations, and roles of protocol contributors                                                      | 11          |

|    |                           |                     |                                                                   |    |
|----|---------------------------|---------------------|-------------------------------------------------------------------|----|
| 1  | Roles and                 | <a href="#">#5b</a> | Name and contact information for the trial sponsor                | 11 |
| 2  | responsibilities:         |                     |                                                                   |    |
| 3  | sponsor contact           |                     |                                                                   |    |
| 4  | information               |                     |                                                                   |    |
| 5  |                           |                     |                                                                   |    |
| 6  |                           |                     |                                                                   |    |
| 7  |                           |                     |                                                                   |    |
| 8  | Roles and                 | <a href="#">#5c</a> | Role of study sponsor and funders, if any, in study design;       | 11 |
| 9  | responsibilities:         |                     | collection, management, analysis, and interpretation of data;     |    |
| 10 | sponsor and funder        |                     | writing of the report; and the decision to submit the report for  |    |
| 11 |                           |                     | publication, including whether they will have ultimate            |    |
| 12 |                           |                     | authority over any of these activities                            |    |
| 13 |                           |                     |                                                                   |    |
| 14 |                           |                     |                                                                   |    |
| 15 |                           |                     |                                                                   |    |
| 16 | Roles and                 | <a href="#">#5d</a> | Composition, roles, and responsibilities of the coordinating      | 11 |
| 17 | responsibilities:         |                     | centre, steering committee, endpoint adjudication committee,      |    |
| 18 | committees                |                     | data management team, and other individuals or groups             |    |
| 19 |                           |                     | overseeing the trial, if applicable (see Item 21a for data        |    |
| 20 |                           |                     | monitoring committee)                                             |    |
| 21 |                           |                     |                                                                   |    |
| 22 |                           |                     |                                                                   |    |
| 23 |                           |                     |                                                                   |    |
| 24 | <b>Introduction</b>       |                     |                                                                   |    |
| 25 |                           |                     |                                                                   |    |
| 26 |                           |                     |                                                                   |    |
| 27 | Background and            | <a href="#">#6a</a> | Description of research question and justification for            | 4  |
| 28 | rationale                 |                     | undertaking the trial, including summary of relevant studies      |    |
| 29 |                           |                     | (published and unpublished) examining benefits and harms for      |    |
| 30 |                           |                     | each intervention                                                 |    |
| 31 |                           |                     |                                                                   |    |
| 32 |                           |                     |                                                                   |    |
| 33 |                           |                     |                                                                   |    |
| 34 | Background and            | <a href="#">#6b</a> | Explanation for choice of comparators                             | 4  |
| 35 | rationale: choice of      |                     |                                                                   |    |
| 36 | comparators               |                     |                                                                   |    |
| 37 |                           |                     |                                                                   |    |
| 38 |                           |                     |                                                                   |    |
| 39 | Objectives                | <a href="#">#7</a>  | Specific objectives or hypotheses                                 | 4  |
| 40 |                           |                     |                                                                   |    |
| 41 | Trial design              | <a href="#">#8</a>  | Description of trial design including type of trial (eg, parallel | 5  |
| 42 |                           |                     | group, crossover, factorial, single group), allocation ratio, and |    |
| 43 |                           |                     | framework (eg, superiority, equivalence, non-inferiority,         |    |
| 44 |                           |                     | exploratory)                                                      |    |
| 45 |                           |                     |                                                                   |    |
| 46 |                           |                     |                                                                   |    |
| 47 |                           |                     |                                                                   |    |
| 48 | <b>Methods:</b>           |                     |                                                                   |    |
| 49 | <b>Participants,</b>      |                     |                                                                   |    |
| 50 | <b>interventions, and</b> |                     |                                                                   |    |
| 51 | <b>outcomes</b>           |                     |                                                                   |    |
| 52 |                           |                     |                                                                   |    |
| 53 |                           |                     |                                                                   |    |
| 54 |                           |                     |                                                                   |    |
| 55 | Study setting             | <a href="#">#9</a>  | Description of study settings (eg, community clinic, academic     | 5  |
| 56 |                           |                     | hospital) and list of countries where data will be collected.     |    |
| 57 |                           |                     | Reference to where list of study sites can be obtained            |    |
| 58 |                           |                     |                                                                   |    |
| 59 |                           |                     |                                                                   |    |
| 60 |                           |                     |                                                                   |    |



|    |                      |                      |                                                                                                                                                                                                                                                                                                                                                                                |   |
|----|----------------------|----------------------|--------------------------------------------------------------------------------------------------------------------------------------------------------------------------------------------------------------------------------------------------------------------------------------------------------------------------------------------------------------------------------|---|
| 1  | Eligibility criteria | <a href="#">#10</a>  | Inclusion and exclusion criteria for participants. If applicable, eligibility criteria for study centres and individuals who will perform the interventions (eg, surgeons, psychotherapists)                                                                                                                                                                                   | 5 |
| 2  |                      |                      |                                                                                                                                                                                                                                                                                                                                                                                |   |
| 3  |                      |                      |                                                                                                                                                                                                                                                                                                                                                                                |   |
| 4  |                      |                      |                                                                                                                                                                                                                                                                                                                                                                                |   |
| 5  |                      |                      |                                                                                                                                                                                                                                                                                                                                                                                |   |
| 6  | Interventions:       | <a href="#">#11a</a> | Interventions for each group with sufficient detail to allow replication, including how and when they will be administered                                                                                                                                                                                                                                                     | 6 |
| 7  | description          |                      |                                                                                                                                                                                                                                                                                                                                                                                |   |
| 8  |                      |                      |                                                                                                                                                                                                                                                                                                                                                                                |   |
| 9  |                      |                      |                                                                                                                                                                                                                                                                                                                                                                                |   |
| 10 | Interventions:       | <a href="#">#11b</a> | Criteria for discontinuing or modifying allocated interventions for a given trial participant (eg, drug dose change in response to harms, participant request, or improving / worsening disease)                                                                                                                                                                               | 6 |
| 11 | modifications        |                      |                                                                                                                                                                                                                                                                                                                                                                                |   |
| 12 |                      |                      |                                                                                                                                                                                                                                                                                                                                                                                |   |
| 13 |                      |                      |                                                                                                                                                                                                                                                                                                                                                                                |   |
| 14 |                      |                      |                                                                                                                                                                                                                                                                                                                                                                                |   |
| 15 |                      |                      |                                                                                                                                                                                                                                                                                                                                                                                |   |
| 16 |                      |                      |                                                                                                                                                                                                                                                                                                                                                                                |   |
| 17 | Interventions:       | <a href="#">#11c</a> | Strategies to improve adherence to intervention protocols, and any procedures for monitoring adherence (eg, drug tablet return; laboratory tests)                                                                                                                                                                                                                              | 6 |
| 18 | adherence            |                      |                                                                                                                                                                                                                                                                                                                                                                                |   |
| 19 |                      |                      |                                                                                                                                                                                                                                                                                                                                                                                |   |
| 20 |                      |                      |                                                                                                                                                                                                                                                                                                                                                                                |   |
| 21 |                      |                      |                                                                                                                                                                                                                                                                                                                                                                                |   |
| 22 | Interventions:       | <a href="#">#11d</a> | Relevant concomitant care and interventions that are permitted or prohibited during the trial                                                                                                                                                                                                                                                                                  | 6 |
| 23 | concomitant care     |                      |                                                                                                                                                                                                                                                                                                                                                                                |   |
| 24 |                      |                      |                                                                                                                                                                                                                                                                                                                                                                                |   |
| 25 |                      |                      |                                                                                                                                                                                                                                                                                                                                                                                |   |
| 26 | Outcomes             | <a href="#">#12</a>  | Primary, secondary, and other outcomes, including the specific measurement variable (eg, systolic blood pressure), analysis metric (eg, change from baseline, final value, time to event), method of aggregation (eg, median, proportion), and time point for each outcome. Explanation of the clinical relevance of chosen efficacy and harm outcomes is strongly recommended | 9 |
| 27 |                      |                      |                                                                                                                                                                                                                                                                                                                                                                                |   |
| 28 |                      |                      |                                                                                                                                                                                                                                                                                                                                                                                |   |
| 29 |                      |                      |                                                                                                                                                                                                                                                                                                                                                                                |   |
| 30 |                      |                      |                                                                                                                                                                                                                                                                                                                                                                                |   |
| 31 |                      |                      |                                                                                                                                                                                                                                                                                                                                                                                |   |
| 32 |                      |                      |                                                                                                                                                                                                                                                                                                                                                                                |   |
| 33 |                      |                      |                                                                                                                                                                                                                                                                                                                                                                                |   |
| 34 |                      |                      |                                                                                                                                                                                                                                                                                                                                                                                |   |
| 35 |                      |                      |                                                                                                                                                                                                                                                                                                                                                                                |   |
| 36 |                      |                      |                                                                                                                                                                                                                                                                                                                                                                                |   |
| 37 | Participant timeline | <a href="#">#13</a>  | Time schedule of enrolment, interventions (including any run-ins and washouts), assessments, and visits for participants. A schematic diagram is highly recommended (see Figure)                                                                                                                                                                                               | 5 |
| 38 |                      |                      |                                                                                                                                                                                                                                                                                                                                                                                |   |
| 39 |                      |                      |                                                                                                                                                                                                                                                                                                                                                                                |   |
| 40 |                      |                      |                                                                                                                                                                                                                                                                                                                                                                                |   |
| 41 |                      |                      |                                                                                                                                                                                                                                                                                                                                                                                |   |
| 42 |                      |                      |                                                                                                                                                                                                                                                                                                                                                                                |   |
| 43 | Sample size          | <a href="#">#14</a>  | Estimated number of participants needed to achieve study objectives and how it was determined, including clinical and statistical assumptions supporting any sample size calculations                                                                                                                                                                                          | 9 |
| 44 |                      |                      |                                                                                                                                                                                                                                                                                                                                                                                |   |
| 45 |                      |                      |                                                                                                                                                                                                                                                                                                                                                                                |   |
| 46 |                      |                      |                                                                                                                                                                                                                                                                                                                                                                                |   |
| 47 |                      |                      |                                                                                                                                                                                                                                                                                                                                                                                |   |
| 48 | Recruitment          | <a href="#">#15</a>  | Strategies for achieving adequate participant enrolment to reach target sample size                                                                                                                                                                                                                                                                                            | 5 |
| 49 |                      |                      |                                                                                                                                                                                                                                                                                                                                                                                |   |
| 50 |                      |                      |                                                                                                                                                                                                                                                                                                                                                                                |   |
| 51 |                      |                      |                                                                                                                                                                                                                                                                                                                                                                                |   |

## Methods:

### Assignment of interventions (for controlled trials)

|    |                        |                      |                                                                                                                                                                                                                                                                                                                                                                                                              |     |
|----|------------------------|----------------------|--------------------------------------------------------------------------------------------------------------------------------------------------------------------------------------------------------------------------------------------------------------------------------------------------------------------------------------------------------------------------------------------------------------|-----|
| 1  | Allocation: sequence   | <a href="#">#16a</a> | Method of generating the allocation sequence (eg, computer-generated random numbers), and list of any factors for stratification. To reduce predictability of a random sequence, details of any planned restriction (eg, blocking) should be provided in a separate document that is unavailable to those who enrol participants or assign interventions                                                     | n/a |
| 2  | generation             |                      |                                                                                                                                                                                                                                                                                                                                                                                                              |     |
| 3  |                        |                      |                                                                                                                                                                                                                                                                                                                                                                                                              |     |
| 4  |                        |                      |                                                                                                                                                                                                                                                                                                                                                                                                              |     |
| 5  |                        |                      |                                                                                                                                                                                                                                                                                                                                                                                                              |     |
| 6  |                        |                      |                                                                                                                                                                                                                                                                                                                                                                                                              |     |
| 7  |                        |                      |                                                                                                                                                                                                                                                                                                                                                                                                              |     |
| 8  |                        |                      |                                                                                                                                                                                                                                                                                                                                                                                                              |     |
| 9  |                        |                      |                                                                                                                                                                                                                                                                                                                                                                                                              |     |
| 10 | Allocation             | <a href="#">#16b</a> | Mechanism of implementing the allocation sequence (eg, central telephone; sequentially numbered, opaque, sealed envelopes), describing any steps to conceal the sequence until interventions are assigned                                                                                                                                                                                                    | n/a |
| 11 | concealment            |                      |                                                                                                                                                                                                                                                                                                                                                                                                              |     |
| 12 | mechanism              |                      |                                                                                                                                                                                                                                                                                                                                                                                                              |     |
| 13 |                        |                      |                                                                                                                                                                                                                                                                                                                                                                                                              |     |
| 14 |                        |                      |                                                                                                                                                                                                                                                                                                                                                                                                              |     |
| 15 |                        |                      |                                                                                                                                                                                                                                                                                                                                                                                                              |     |
| 16 |                        |                      |                                                                                                                                                                                                                                                                                                                                                                                                              |     |
| 17 | Allocation:            | <a href="#">#16c</a> | Who will generate the allocation sequence, who will enrol participants, and who will assign participants to interventions                                                                                                                                                                                                                                                                                    | 5   |
| 18 | implementation         |                      |                                                                                                                                                                                                                                                                                                                                                                                                              |     |
| 19 |                        |                      |                                                                                                                                                                                                                                                                                                                                                                                                              |     |
| 20 |                        |                      |                                                                                                                                                                                                                                                                                                                                                                                                              |     |
| 21 | Blinding (masking)     | <a href="#">#17a</a> | Who will be blinded after assignment to interventions (eg, trial participants, care providers, outcome assessors, data analysts), and how                                                                                                                                                                                                                                                                    | n/a |
| 22 |                        |                      |                                                                                                                                                                                                                                                                                                                                                                                                              |     |
| 23 |                        |                      |                                                                                                                                                                                                                                                                                                                                                                                                              |     |
| 24 |                        |                      |                                                                                                                                                                                                                                                                                                                                                                                                              |     |
| 25 |                        |                      |                                                                                                                                                                                                                                                                                                                                                                                                              |     |
| 26 | Blinding (masking):    | <a href="#">#17b</a> | If blinded, circumstances under which unblinding is permissible, and procedure for revealing a participant's allocated intervention during the trial                                                                                                                                                                                                                                                         | n/a |
| 27 | emergency unblinding   |                      |                                                                                                                                                                                                                                                                                                                                                                                                              |     |
| 28 |                        |                      |                                                                                                                                                                                                                                                                                                                                                                                                              |     |
| 29 |                        |                      |                                                                                                                                                                                                                                                                                                                                                                                                              |     |
| 30 |                        |                      |                                                                                                                                                                                                                                                                                                                                                                                                              |     |
| 31 |                        |                      |                                                                                                                                                                                                                                                                                                                                                                                                              |     |
| 32 | <b>Methods: Data</b>   |                      |                                                                                                                                                                                                                                                                                                                                                                                                              |     |
| 33 | <b>collection,</b>     |                      |                                                                                                                                                                                                                                                                                                                                                                                                              |     |
| 34 | <b>management, and</b> |                      |                                                                                                                                                                                                                                                                                                                                                                                                              |     |
| 35 | <b>analysis</b>        |                      |                                                                                                                                                                                                                                                                                                                                                                                                              |     |
| 36 |                        |                      |                                                                                                                                                                                                                                                                                                                                                                                                              |     |
| 37 |                        |                      |                                                                                                                                                                                                                                                                                                                                                                                                              |     |
| 38 |                        |                      |                                                                                                                                                                                                                                                                                                                                                                                                              |     |
| 39 | Data collection plan   | <a href="#">#18a</a> | Plans for assessment and collection of outcome, baseline, and other trial data, including any related processes to promote data quality (eg, duplicate measurements, training of assessors) and a description of study instruments (eg, questionnaires, laboratory tests) along with their reliability and validity, if known. Reference to where data collection forms can be found, if not in the protocol | 8   |
| 40 |                        |                      |                                                                                                                                                                                                                                                                                                                                                                                                              |     |
| 41 |                        |                      |                                                                                                                                                                                                                                                                                                                                                                                                              |     |
| 42 |                        |                      |                                                                                                                                                                                                                                                                                                                                                                                                              |     |
| 43 |                        |                      |                                                                                                                                                                                                                                                                                                                                                                                                              |     |
| 44 |                        |                      |                                                                                                                                                                                                                                                                                                                                                                                                              |     |
| 45 |                        |                      |                                                                                                                                                                                                                                                                                                                                                                                                              |     |
| 46 |                        |                      |                                                                                                                                                                                                                                                                                                                                                                                                              |     |
| 47 |                        |                      |                                                                                                                                                                                                                                                                                                                                                                                                              |     |
| 48 |                        |                      |                                                                                                                                                                                                                                                                                                                                                                                                              |     |
| 49 |                        |                      |                                                                                                                                                                                                                                                                                                                                                                                                              |     |
| 50 | Data collection plan:  | <a href="#">#18b</a> | Plans to promote participant retention and complete follow-up, including list of any outcome data to be collected for participants who discontinue or deviate from intervention protocols                                                                                                                                                                                                                    | 8   |
| 51 | retention              |                      |                                                                                                                                                                                                                                                                                                                                                                                                              |     |
| 52 |                        |                      |                                                                                                                                                                                                                                                                                                                                                                                                              |     |
| 53 |                        |                      |                                                                                                                                                                                                                                                                                                                                                                                                              |     |
| 54 |                        |                      |                                                                                                                                                                                                                                                                                                                                                                                                              |     |
| 55 |                        |                      |                                                                                                                                                                                                                                                                                                                                                                                                              |     |
| 56 |                        |                      |                                                                                                                                                                                                                                                                                                                                                                                                              |     |
| 57 | Data management        | <a href="#">#19</a>  | Plans for data entry, coding, security, and storage, including any related processes to promote data quality (eg, double data                                                                                                                                                                                                                                                                                | 8   |
| 58 |                        |                      |                                                                                                                                                                                                                                                                                                                                                                                                              |     |
| 59 |                        |                      |                                                                                                                                                                                                                                                                                                                                                                                                              |     |
| 60 |                        |                      |                                                                                                                                                                                                                                                                                                                                                                                                              |     |

entry; range checks for data values). Reference to where details of data management procedures can be found, if not in the protocol

|    |                                                  |                      |     |
|----|--------------------------------------------------|----------------------|-----|
| 1  |                                                  |                      |     |
| 2  |                                                  |                      |     |
| 3  |                                                  |                      |     |
| 4  |                                                  |                      |     |
| 5  | Statistics: outcomes                             | <a href="#">#20a</a> | 9   |
| 6  |                                                  |                      |     |
| 7  |                                                  |                      |     |
| 8  |                                                  |                      |     |
| 9  |                                                  |                      |     |
| 10 |                                                  |                      |     |
| 11 | Statistics: additional analyses                  | <a href="#">#20b</a> | 9   |
| 12 |                                                  |                      |     |
| 13 |                                                  |                      |     |
| 14 |                                                  |                      |     |
| 15 | Statistics: analysis population and missing data | <a href="#">#20c</a> | 9   |
| 16 |                                                  |                      |     |
| 17 |                                                  |                      |     |
| 18 |                                                  |                      |     |
| 19 |                                                  |                      |     |
| 20 | <b>Methods: Monitoring</b>                       |                      |     |
| 21 |                                                  |                      |     |
| 22 | Data monitoring: formal committee                | <a href="#">#21a</a> | 8   |
| 23 |                                                  |                      |     |
| 24 |                                                  |                      |     |
| 25 |                                                  |                      |     |
| 26 |                                                  |                      |     |
| 27 |                                                  |                      |     |
| 28 |                                                  |                      |     |
| 29 |                                                  |                      |     |
| 30 |                                                  |                      |     |
| 31 |                                                  |                      |     |
| 32 | Data monitoring: interim analysis                | <a href="#">#21b</a> | n/a |
| 33 |                                                  |                      |     |
| 34 |                                                  |                      |     |
| 35 |                                                  |                      |     |
| 36 |                                                  |                      |     |
| 37 | Harms                                            | <a href="#">#22</a>  | 9   |
| 38 |                                                  |                      |     |
| 39 |                                                  |                      |     |
| 40 |                                                  |                      |     |
| 41 |                                                  |                      |     |
| 42 |                                                  |                      |     |
| 43 | Auditing                                         | <a href="#">#23</a>  | 9   |
| 44 |                                                  |                      |     |
| 45 |                                                  |                      |     |
| 46 |                                                  |                      |     |
| 47 |                                                  |                      |     |
| 48 | <b>Ethics and dissemination</b>                  |                      |     |
| 49 |                                                  |                      |     |
| 50 |                                                  |                      |     |
| 51 |                                                  |                      |     |
| 52 | Research ethics approval                         | <a href="#">#24</a>  | 5   |
| 53 |                                                  |                      |     |
| 54 |                                                  |                      |     |
| 55 |                                                  |                      |     |
| 56 | Protocol amendments                              | <a href="#">#25</a>  | n/a |
| 57 |                                                  |                      |     |
| 58 |                                                  |                      |     |
| 59 |                                                  |                      |     |
| 60 |                                                  |                      |     |

relevant parties (eg, investigators, REC / IRBs, trial participants, trial registries, journals, regulators)

|    |                                             |                      |                                                                                                                                                                                                                                                                                     |
|----|---------------------------------------------|----------------------|-------------------------------------------------------------------------------------------------------------------------------------------------------------------------------------------------------------------------------------------------------------------------------------|
| 1  |                                             |                      |                                                                                                                                                                                                                                                                                     |
| 2  |                                             |                      |                                                                                                                                                                                                                                                                                     |
| 3  |                                             |                      |                                                                                                                                                                                                                                                                                     |
| 4  | Consent or assent                           | <a href="#">#26a</a> | Who will obtain informed consent or assent from potential trial participants or authorised surrogates, and how (see Item 32)                                                                                                                                                        |
| 5  |                                             |                      |                                                                                                                                                                                                                                                                                     |
| 6  |                                             |                      |                                                                                                                                                                                                                                                                                     |
| 7  |                                             |                      |                                                                                                                                                                                                                                                                                     |
| 8  |                                             |                      |                                                                                                                                                                                                                                                                                     |
| 9  | Consent or assent: ancillary studies        | <a href="#">#26b</a> | Additional consent provisions for collection and use of participant data and biological specimens in ancillary studies, if applicable                                                                                                                                               |
| 10 |                                             |                      |                                                                                                                                                                                                                                                                                     |
| 11 |                                             |                      |                                                                                                                                                                                                                                                                                     |
| 12 |                                             |                      |                                                                                                                                                                                                                                                                                     |
| 13 |                                             |                      |                                                                                                                                                                                                                                                                                     |
| 14 | Confidentiality                             | <a href="#">#27</a>  | How personal information about potential and enrolled participants will be collected, shared, and maintained in order to protect confidentiality before, during, and after the trial                                                                                                |
| 15 |                                             |                      |                                                                                                                                                                                                                                                                                     |
| 16 |                                             |                      |                                                                                                                                                                                                                                                                                     |
| 17 |                                             |                      |                                                                                                                                                                                                                                                                                     |
| 18 |                                             |                      |                                                                                                                                                                                                                                                                                     |
| 19 |                                             |                      |                                                                                                                                                                                                                                                                                     |
| 20 | Declaration of interests                    | <a href="#">#28</a>  | Financial and other competing interests for principal investigators for the overall trial and each study site                                                                                                                                                                       |
| 21 |                                             |                      |                                                                                                                                                                                                                                                                                     |
| 22 |                                             |                      |                                                                                                                                                                                                                                                                                     |
| 23 |                                             |                      |                                                                                                                                                                                                                                                                                     |
| 24 | Data access                                 | <a href="#">#29</a>  | Statement of who will have access to the final trial dataset, and disclosure of contractual agreements that limit such access for investigators                                                                                                                                     |
| 25 |                                             |                      |                                                                                                                                                                                                                                                                                     |
| 26 |                                             |                      |                                                                                                                                                                                                                                                                                     |
| 27 |                                             |                      |                                                                                                                                                                                                                                                                                     |
| 28 |                                             |                      |                                                                                                                                                                                                                                                                                     |
| 29 | Ancillary and post trial care               | <a href="#">#30</a>  | Provisions, if any, for ancillary and post-trial care, and for compensation to those who suffer harm from trial participation                                                                                                                                                       |
| 30 |                                             |                      |                                                                                                                                                                                                                                                                                     |
| 31 |                                             |                      |                                                                                                                                                                                                                                                                                     |
| 32 |                                             |                      |                                                                                                                                                                                                                                                                                     |
| 33 |                                             |                      |                                                                                                                                                                                                                                                                                     |
| 34 | Dissemination policy: trial results         | <a href="#">#31a</a> | Plans for investigators and sponsor to communicate trial results to participants, healthcare professionals, the public, and other relevant groups (eg, via publication, reporting in results databases, or other data sharing arrangements), including any publication restrictions |
| 35 |                                             |                      |                                                                                                                                                                                                                                                                                     |
| 36 |                                             |                      |                                                                                                                                                                                                                                                                                     |
| 37 |                                             |                      |                                                                                                                                                                                                                                                                                     |
| 38 |                                             |                      |                                                                                                                                                                                                                                                                                     |
| 39 |                                             |                      |                                                                                                                                                                                                                                                                                     |
| 40 |                                             |                      |                                                                                                                                                                                                                                                                                     |
| 41 |                                             |                      |                                                                                                                                                                                                                                                                                     |
| 42 |                                             |                      |                                                                                                                                                                                                                                                                                     |
| 43 | Dissemination policy: authorship            | <a href="#">#31b</a> | Authorship eligibility guidelines and any intended use of professional writers                                                                                                                                                                                                      |
| 44 |                                             |                      |                                                                                                                                                                                                                                                                                     |
| 45 |                                             |                      |                                                                                                                                                                                                                                                                                     |
| 46 |                                             |                      |                                                                                                                                                                                                                                                                                     |
| 47 | Dissemination policy: reproducible research | <a href="#">#31c</a> | Plans, if any, for granting public access to the full protocol, participant-level dataset, and statistical code                                                                                                                                                                     |
| 48 |                                             |                      |                                                                                                                                                                                                                                                                                     |
| 49 |                                             |                      |                                                                                                                                                                                                                                                                                     |

## Appendices

|    |                            |                     |                                                                                                                           |
|----|----------------------------|---------------------|---------------------------------------------------------------------------------------------------------------------------|
| 50 |                            |                     |                                                                                                                           |
| 51 |                            |                     |                                                                                                                           |
| 52 |                            |                     |                                                                                                                           |
| 53 | Informed consent materials | <a href="#">#32</a> | Model consent form and other related documentation given to participants and authorised surrogates                        |
| 54 |                            |                     |                                                                                                                           |
| 55 |                            |                     |                                                                                                                           |
| 56 |                            |                     |                                                                                                                           |
| 57 | Biological specimens       | <a href="#">#33</a> | Plans for collection, laboratory evaluation, and storage of biological specimens for genetic or molecular analysis in the |
| 58 |                            |                     |                                                                                                                           |
| 59 |                            |                     |                                                                                                                           |
| 60 |                            |                     |                                                                                                                           |

1 current trial and for future use in ancillary studies, if  
2 applicable  
3

4 The SPIRIT checklist is distributed under the terms of the Creative Commons Attribution License CC-BY-ND  
5 3.0. This checklist was completed on 14. September 2020 using <https://www.goodreports.org/>, a tool made by  
6 the [EQUATOR Network](#) in collaboration with [Penelope.ai](#)  
7  
8  
9  
10  
11  
12  
13  
14  
15  
16  
17  
18  
19  
20  
21  
22  
23  
24  
25  
26  
27  
28  
29  
30  
31  
32  
33  
34  
35  
36  
37  
38  
39  
40  
41  
42  
43  
44  
45  
46  
47  
48  
49  
50  
51  
52  
53  
54  
55  
56  
57  
58  
59  
60

# BMJ Open

## Anaesthetic protocol for paediatric glaucoma examinations - the prospective EyeBIS study protocol

|                                 |                                                                                                                                                                                                                                                                                                                                                                                                                                                                                                                                                                                                                                                                                                                                                                                                                                                                                                                                                                                         |
|---------------------------------|-----------------------------------------------------------------------------------------------------------------------------------------------------------------------------------------------------------------------------------------------------------------------------------------------------------------------------------------------------------------------------------------------------------------------------------------------------------------------------------------------------------------------------------------------------------------------------------------------------------------------------------------------------------------------------------------------------------------------------------------------------------------------------------------------------------------------------------------------------------------------------------------------------------------------------------------------------------------------------------------|
| Journal:                        | <i>BMJ Open</i>                                                                                                                                                                                                                                                                                                                                                                                                                                                                                                                                                                                                                                                                                                                                                                                                                                                                                                                                                                         |
| Manuscript ID                   | bmjopen-2020-045906.R2                                                                                                                                                                                                                                                                                                                                                                                                                                                                                                                                                                                                                                                                                                                                                                                                                                                                                                                                                                  |
| Article Type:                   | Protocol                                                                                                                                                                                                                                                                                                                                                                                                                                                                                                                                                                                                                                                                                                                                                                                                                                                                                                                                                                                |
| Date Submitted by the Author:   | 31-Aug-2021                                                                                                                                                                                                                                                                                                                                                                                                                                                                                                                                                                                                                                                                                                                                                                                                                                                                                                                                                                             |
| Complete List of Authors:       | Pirlich, Nina; University Medical Centre of the Johannes Gutenberg University Mainz, Dept. of Anaesthesiology<br>Grehn, Franz; University Medical Centre of the Johannes Gutenberg University Mainz, Dept. of Ophthalmology<br>Mohnke, Katja; University Medical Centre of the Johannes Gutenberg University Mainz, Dept. of Anaesthesiology<br>Maucher, Konrad; University Medical Centre of the Johannes Gutenberg University Mainz, Dept. of Anaesthesiology<br>Schuster, Alexander; University Medical Centre of the Johannes Gutenberg University Mainz, Dept. of Ophthalmology<br>Wittenmeier, Eva; University Medical Centre of the Johannes Gutenberg University Mainz, Dept. of Anaesthesiology<br>Schmidtman, Irene; University Medical Centre of the Johannes Gutenberg University Mainz, Institute of Medical Biostatistics, Epidemiology and Informatics<br>Hoffmann, Esther; University Medical Centre of the Johannes Gutenberg University Mainz, Dept. of Ophthalmology |
| <b>Primary Subject Heading</b>: | Ophthalmology                                                                                                                                                                                                                                                                                                                                                                                                                                                                                                                                                                                                                                                                                                                                                                                                                                                                                                                                                                           |
| Secondary Subject Heading:      | Anaesthesia, Ophthalmology, Paediatrics, Patient-centred medicine, Research methods                                                                                                                                                                                                                                                                                                                                                                                                                                                                                                                                                                                                                                                                                                                                                                                                                                                                                                     |
| Keywords:                       | Anaesthesia in ophthalmology < ANAESTHETICS, Paediatric anaesthesia < ANAESTHETICS, Glaucoma < OPHTHALMOLOGY, Paediatric ophthalmology < OPHTHALMOLOGY                                                                                                                                                                                                                                                                                                                                                                                                                                                                                                                                                                                                                                                                                                                                                                                                                                  |
|                                 |                                                                                                                                                                                                                                                                                                                                                                                                                                                                                                                                                                                                                                                                                                                                                                                                                                                                                                                                                                                         |

SCHOLARONE™  
Manuscripts



I, the Submitting Author has the right to grant and does grant on behalf of all authors of the Work (as defined in the below author licence), an exclusive licence and/or a non-exclusive licence for contributions from authors who are: i) UK Crown employees; ii) where BMJ has agreed a CC-BY licence shall apply, and/or iii) in accordance with the terms applicable for US Federal Government officers or employees acting as part of their official duties; on a worldwide, perpetual, irrevocable, royalty-free basis to BMJ Publishing Group Ltd ("BMJ") its licensees and where the relevant Journal is co-owned by BMJ to the co-owners of the Journal, to publish the Work in this journal and any other BMJ products and to exploit all rights, as set out in our [licence](#).

The Submitting Author accepts and understands that any supply made under these terms is made by BMJ to the Submitting Author unless you are acting as an employee on behalf of your employer or a postgraduate student of an affiliated institution which is paying any applicable article publishing charge ("APC") for Open Access articles. Where the Submitting Author wishes to make the Work available on an Open Access basis (and intends to pay the relevant APC), the terms of reuse of such Open Access shall be governed by a Creative Commons licence – details of these licences and which [Creative Commons](#) licence will apply to this Work are set out in our licence referred to above.

Other than as permitted in any relevant BMJ Author's Self Archiving Policies, I confirm this Work has not been accepted for publication elsewhere, is not being considered for publication elsewhere and does not duplicate material already published. I confirm all authors consent to publication of this Work and authorise the granting of this licence.

1  
2  
3  
4  
5 **Anaesthetic protocol for paediatric glaucoma examinations - the prospective EyeBIS**  
6 **study protocol**  
7

8  
9 Nina Pirlich<sup>1</sup>, Franz Grehn<sup>3</sup>, Katja Mohnke<sup>1</sup>, Konrad Maucher<sup>1</sup>, Alexander K.  
10 Schuster<sup>3</sup>, Eva Wittenmeier<sup>1</sup>, Irene Schmidtman<sup>2</sup>, Esther M. Hoffmann<sup>3</sup>  
11

12 <sup>1</sup>Department of Anaesthesiology, University Medical Centre of the Johannes Gutenberg-  
13 University Mainz, Mainz, Germany

14 <sup>2</sup> Institute of Medical Biostatistics, Epidemiology and Informatics, University Medical Centre  
15 of the Johannes Gutenberg-University Mainz, Mainz, Germany

16 <sup>3</sup>Department of Ophthalmology, University Medical Centre of the Johannes Gutenberg-  
17 University Mainz, Mainz, Germany  
18  
19  
20  
21

22  
23 Correspondence to:  
24 Esther M. Hoffmann  
25 Augenklinik und Poliklinik  
26 Universitätsmedizin Mainz  
27 Langenbeckstr. 1  
28 55131 Mainz  
29 Fax: +496131176620  
30 Phone: +496131177085  
31

32 [ehoffman@uni-mainz.de](mailto:ehoffman@uni-mainz.de)  
33  
34  
35  
36  
37  
38  
39  
40  
41  
42  
43  
44  
45  
46  
47  
48  
49  
50  
51  
52  
53  
54  
55  
56  
57  
58  
59  
60



## ABSTRACT

**Introduction** Neonates and young infants with diagnosed or highly suspected glaucoma require an examination under anaesthesia to achieve accurate intraocular pressure (IOP) measurements, since crying or squinting of the eyes may increase IOP and lead to falsely high values. IOP considerably depends on perioperative variables such as haemodynamic factors, anaesthetics, depth of anaesthesia and airway management. The aim of this paper is to report the design and baseline characteristics of EyeBIS, which is a study to develop a standardized anaesthetic protocol for the measurement of IOP under anaesthesia in childhood glaucoma by investigating the link between the magnitude of IOP and depth of anaesthesia.

**Methods and analysis** This is a single centre, prospective cohort study in 100 children with diagnosed or highly suspected glaucoma all undergoing ophthalmological examination under general anaesthesia. 20 children, who undergo general anaesthesia for other reasons, are included as controls. The primary outcome measure is the establishment of a standardized anaesthetic protocol for IOP measurement in childhood glaucoma by assessing the relationship between IOP and depth of anaesthesia (calculated as an electroencephalography (EEG) variable, the bispectral index (BIS)), with special emphasis on airway management and haemodynamic parameters. The dependence of IOP under anaesthesia on airway management and haemodynamic parameters will be described, using a mixed linear model. Restricting the model to patients with healthy eyes, will allow to determine a 95% reference region, in which 95% of the measurement values of patients with healthy eyes can be expected.

**Ethics and dissemination** The study has been approved by the local ethics committee of the Medical Association of Rhineland-Palatine (Ethik-Kommission der Landesärztekammer Rheinland-Pfalz), Germany (Approval number: 2019-14207). This work will be disseminated by publication of peer-reviewed manuscripts, presentation in abstract form at national and international scientific meetings and data sharing with other investigators.

**Trial registration number** ClinicalTrials.gov NCT03972852

Key words: glaucoma, children, intraocular pressure, anaesthesia, standard protocol

### STRENGTHS AND LIMITATIONS OF THIS STUDY

- EyeBIS will be the first study investigating the measurement of IOP in neonates and young infants taking into account the complexity of multifactorial disruptive perioperative factors.
- EyeBIS will provide data on distribution of paediatric intraocular pressure.
- The developed protocol may provide a recommendation for other glaucoma centres.
- It is only a single-centre observational study.

For peer review only

## INTRODUCTION

### Background and rationale

A basic requirement for diagnosis, monitoring and therapy of childhood glaucoma is the accurate measurement of intraocular pressure (IOP). Despite newer less invasive measurement techniques (rebound technology), neonates and young infants still require an examination under anaesthesia (EUA), either under sedation or general anaesthesia.

Squinting and the elevated stress level following the release of catecholamines may lead to falsely high IOP values and subsequently to inadequate therapy. Success rates for correct measurement of IOP in awake children vary between 14% and 60% in the literature.<sup>1 2</sup> As congenital glaucoma damage in newborns and young children is exclusively intraocular pressure (IOP) related (i.e. Descemet tears, optic nerve head damage) accurate measurement of IOP under EUA is crucial.

To date, there are no prospective studies from which detailed recommendations on standardized general anaesthesia in children with glaucoma may be derived.

Perioperative anaesthetics include all inhalation anaesthetics and most centrally depressing drugs such as propofol, benzodiazepines and opioids. They result in a reduction of IOP in both healthy and glaucomatous eyes.<sup>3</sup> The depth of anaesthesia and IOP reduction are correlated. IOP-lowering effects depend on the applied dose and on the time of administration<sup>4-7</sup>. The effects of propofol on IOP are mainly known in adult patients, where IOP reduction is suspected to be associated with the lowering of the mean arterial pressure.<sup>8</sup> Available data on the effect of propofol on IOP in healthy children is inconsistent and there are no data in children with glaucoma.<sup>9</sup> Furthermore, there are no data on the influence of opioids on the IOP of children with glaucoma.

When applying anaesthesia, airway management also has an influence on IOP.<sup>3</sup> Laryngoscopy and intubation can increase IOP substantially, especially when it comes to coughing. However, IOP may rise even without an externally detectable reaction such as a sympathicotonic cardiovascular mechanism, especially with shallow anaesthesia.<sup>10-12</sup> Laryngeal masks are widely used in adult and paediatric respiratory management and considered safe by paediatric anaesthesiologists in a variety of clinical settings.<sup>13</sup> Compared to endotracheal intubation in children, the use of laryngeal masks is associated with less cardiovascular reactions and a lesser increase in IOP.<sup>14</sup>

The EyeBIS study will be the first study to employ a strict standardized protocol for anaesthesia in children with glaucoma. The study will assess the relationship between depth of anaesthesia and IOP in this population. To determine depth of anaesthesia, the bispectral index (BIS) is used. The index has a range of 0-100 and is a calculated electroencephalography (EEG) variable, used to measure the effects of anaesthetics. A BIS score below 60 indicates the degree of hypnosis of EUA. Both Schäfer and Hanna have described the need to investigate the relationship between depth of anaesthesia and IOP.<sup>6 15</sup> A correlation between IOP and depth of anaesthesia using BIS in children is already available.<sup>16</sup> The purpose of this manuscript is to report on this protocol in the population described below.

## METHODS AND ANALYSIS

### Study setting and design

The Department of Ophthalmology, University Medical Center Mainz, has developed an expertise in childhood glaucoma diseases. In the years 2016 and 2017, surgery was performed in approximately 80 children. Since the founding of the German Childhood Glaucoma Centre at the University Medical Center Mainz in June 2017, the number of children receiving a glaucoma diagnosis or surgery has increased significantly. The collaboration between paediatric ophthalmologists and paediatric anaesthesiologists has led to an enhanced focus and expertise in this area and identified the necessity to develop a standardized protocol for general anaesthesia while performing IOP measurements. Established and safe anaesthesia regimens have been modified, taking into account various known factors that influence the measurement of IOP.

With the planned study, we would like to evaluate whether reliable and reproducible measurement values can be generated by a standardized protocol. The EyeBIS trial is a prospective, single-centre, non-randomized clinical trial.

### Patient and Public Involvement

Patients of this research were first involved in June 2019 by the research team (NP and EMH, and medical students). Eligible patients (see section below) were asked whether they are interested in this study. Inclusion criteria were discussed with parents and children and patients were examined according to the individual standards and SOPs of the Clinic for Anaesthesiology and the Dept. of Ophthalmology. Patients were not involved in the development and design of the study protocol. The public was not involved. Study results will not be disseminated to participants specifically. However, if participants are interested in the results of the research they will receive any information, the manuscript, and published research on this topic in the future.

### Trial population and eligibility criteria

Children in the age group 6 months to 10 years will be included, when meeting the following criteria: requirement of EUA with a laryngeal mask for a surgical or diagnostic procedure; suspected glaucoma or control children undergoing ocular surgery other than glaucoma surgery (control group); ASA classification 1, 2 or 3; and informed written consent from one of their legal representatives.

Patients will not be included in this trial if they meet one or more of the following criteria: contraindications to the use of a laryngeal mask (e.g., severe infections; tumour or bleeding in the upper airway tract, which might prevent the sufficient placement of the laryngeal mask; if the expected magnitude of ventilation pressure exceeds the upper leakage pressure of the laryngeal mask (40 cm H<sub>2</sub>O); the necessity of a constant tracheal access; patients with a severe gastro-oesophageal reflux; or interference of the laryngeal mask with the surgical approach), or known allergy to propofol or remifentanyl. Eligibility criteria are shown in Figure 1.

### Recruitment and participant timelines

Participant inclusion started in June 2019 in the Childhood Glaucoma Centre at the University Medical Centre, Mainz, Germany. The history and physical examinations of all patients scheduled for surgery were screened preoperatively for predictors of difficult airway, oesophageal reflux and allergies.

Patient will be informed about the study by the investigators and medical students (EMH, NP) Patients will be included if they require the insertion of a laryngeal mask under general

1  
2  
3 anaesthesia. Informed consent for all paediatric participants will be obtained from one of their  
4 legal representatives. This also includes information and consent according to the German  
5 Medical Privacy Rules (DSGVO, in analogy to the US Insurance Portability and  
6 Accountability Act of 1996 (HIPAA)). Prospective approval of the study will be granted by the  
7 local ethics committee of the Medical Association of the Rhineland-Palatine state (Ethik-  
8 Kommission der Landesärztekammer Rheinland-Pfalz), Germany (approval number: 2019-  
9 14207). The Clinical Trials registration number of the study is ClinicalTrials.gov  
10 NCT03972852.  
11

12  
13 The schedule of study enrolment is shown in Figure 2.  
14

## 15 16 **Intervention**

17 Induction and maintenance of EUA is performed. In the present study, the laryngeal mask  
18 Ambu® AuraGain™ (German distribution by Ambu GmbH, Bad Nauheim, Germany) is used,  
19 which is a second-generation laryngeal mask with integrated gastric access and the  
20 possibility of fiberoptic intubation.<sup>17</sup> Compression of the cervical vessels through the cuff of  
21 laryngeal masks has been reported in adults.<sup>18</sup> It has not been investigated whether the  
22 blockage of a laryngeal mask in children has an influence on IOP by obstructing the venous  
23 return. According to the standard operating procedures of the Department of  
24 Anaesthesiology, a premedication with oral midazolam (juice) is administered when the  
25 patient is collected from the ward. A dosage of 0.5 mg/kg (up to a maximum dose of 10 mg)  
26 is given.  
27  
28

29 Local anaesthetics are applied topically to two possible puncture sites at least 1 h prior to  
30 surgery. Before induction of anaesthesia, intravenous (i.v.) access is established. The child's  
31 head is positioned in a neutral way in a head ring, with the body in a flat back position. To  
32 optimize mask ventilation, the shoulder blades are padded with a rolled-up surgical tissue.  
33  
34

35 The induction and maintenance of EUA is performed by an anaesthesiologist, specifically  
36 educated in anaesthesia for neonates and young infants. Before initiating the EUA, pulse  
37 oximetry monitoring, ECG, non-invasive blood pressure measurement and the BIS are  
38 started.  
39

40 Preoxygenation takes place with a  $\text{FiO}_2$  of 0.8 and a fresh gas flow of 7 l/min.  
41

42 As soon as the BIS measurement starts, the BIS value and an initial blood pressure value is  
43 noted.  
44

45 If it is possible to establish i.v. access, an initial propofol bolus of 2-4 mg/kg body weight is  
46 applied. The children are breathing spontaneously. When the oxygen saturation drops below  
47 90%, a ventilation via a face mask takes place.  
48

49 The schedule of interventions is also summarized in Figure 2.  
50

51 IOP measurements take place during different depths of anaesthesia. Measurement is taken  
52 by one experienced examiner per child (KM, AKS, EMH). A first IOP measurement is  
53 performed when sufficient sedation for IOP measurement after titrated propofol application  
54 (2-4 mg/kg or more if necessary) is achieved. A second IOP measurement is carried out 60 s  
55 after placement of the laryngeal mask to avoid a potentially falsely high IOP value due to a  
56 direct sympathicotonic reaction caused by the laryngeal mask placement. Then, a third IOP  
57 measurement is taken after a break of 60 s directly after blockage of the cuff of the laryngeal  
58 mask (60  $\text{cmH}_2\text{O}$ ).  
59  
60

IOP measurement of each eye is performed with the iCare® PRO tonometer followed by a measurement with the Perkins applanation tonometer after a one-minute waiting time to avoid potential influence of repetitive measurements on IOP.

Central corneal thickness (CCT) has an influence on IOP measurement in adults and children and is measured in this study.<sup>19</sup> CCT has also been shown to be a relevant factor in the evaluation of childhood glaucoma in many studies and appears to result in significant differences in the measurement of IOP, depending on the device used.<sup>20</sup> This is why two different devices are used in this study. All IOP measurements are performed by one of three expert study investigators.

The Perkins Mk3 is available for measuring IOP. The Perkins Mk3 is a mobile, battery-powered applanation tonometer, which consists of the following components: a forehead support for correct placement, a handgrip for the examiner, a LED light source with a blue filter, a biprism and a force transducer. The force transducer measures how much force the examiner must use to flatten the cornea to a defined circular area of 4.8 mm<sup>2</sup> (diameter 3.06 mm). For the visualization of the edge of this surface, fluoresceine (a fluorescent dye) is applied in advance to the cornea. In compliant adults the awake patient is examined after topical application of a local anaesthetic.

The system draws on the 1965 prototype developed by Perkins.<sup>21</sup> It has been specifically designed to measure IOP in patients who cannot adequately sit upright at a standard stationary applanation tonometer.

The iCare® ProTonometer (iCare Finland Oy, 01510 Vantaa, Finland, German distribution by bon Optic Vertriebsgesellschaft GmbH, Lübeck, Germany) has been available for in- and outpatient as well as self-tonometry since its certification in 2010. The iCare® PRO Tonometer is a mobile, battery-operated rebound or induction tonometer, which consists of the following components: a forehead support for correct placement, a handle for the examiner and a miniaturized measuring head. The measuring head bounces against the cornea from a short distance in six, very short individual measurements. Depending on the IOP, the measuring head is slowed down to varying degrees, from which the device calculates the IOP using magnetic coils. The compliant awake patient does not require local anaesthesia. Only a few studies have compared the two techniques in children.<sup>22 23</sup>

The agreement between the instruments (Perkins applanation tonometry and iCare rebound tonometry) has been evaluated only in a few studies under different conditions than our study. Rebound tonometry has been shown to overestimate IOP in high IOP values.

### **Central corneal thickness measurement**

Measurement of central corneal thickness is performed by Tomey AL-3000 (Tomey GmbH, Nurnberg, Germany). The SP-3000 is an ophthalmic diagnosis instrument which acquires corneal thickness, by using ultrasonic waves that are transmitted from the ultrasonic oscillator enclosed in the probe. One measurement is performed in each eye.

In addition to IOP measurements, BIS values, blood pressure (including mean arterial pressure), heart rate and oxygen saturation are documented for each time point of IOP measurement. General anaesthesia is maintained with a syringe pump of propofol at a rate of 4-5 mg/kg/h and a syringe pump of remifentanil with a running rate of 0.3 µg/kg/min. In case an i.v. access is initially not possible, mask induction of EUA via sevoflurane (4 vol%, flow 7 l/min, FiO<sub>2</sub> 0.8) is performed, followed by the establishment of an i.v. access.

Figure 3 presents all interventions on a time scale.

## Bispectral Index Monitoring

The study uses the Aspect XP Bispectral Index Monitor (Medtronic Inc, Minneapolis, MN 55432, USA). It is available for intraclinical brain function monitoring by deriving raw EEG signals from patients for perioperative or intensive care monitoring, as well as for clinical research.

As described in the introduction, the BIS, with a dimension of 0-100, is a calculated EEG variable and can be used to aid in assessing the effects of anaesthetics. A BIS score below 60 indicates the degree of hypnosis of general anaesthesia. The measurement is carried out by a sensor fitted for the paediatric anatomy (BISTM Paediatric Sensor), which is mounted on the forehead of the patient.

Data from children who had to undergo mask induction are excluded from the main analysis and analyzed separately. Criteria to cancel the intervention include an unexpectedly difficult airway, an unrecoverable laryngeal mask leak, a different need for endotracheal intubation, and circulatory instability requiring intervention.

### Outcomes measures

Primary outcome of the study is the correlation between Bispectral Index (BIS) and intraocular pressure (IOP) under standardised anaesthetic conditions.

Aim of this protocol paper is to report design and baseline characteristics of EyeBIS, a study to develop a standardised anaesthetic protocol for the measurement of IOP under general anaesthesia in childhood glaucoma by investigating the partial correlation between the magnitude of IOP and depth of anaesthesia adjusting for potential confounders.

Secondary outcome measures include the comparison of two different IOP measurements methods (applanation tonometry and rebound tonometry), the magnitude of the paediatric IOP during EUA in relation to cuff pressure of the laryngeal mask, regarding end expiratory CO<sub>2</sub> pressure, blood pressure and heart frequency, effect size of midazolam premedication and the definition of the normal range of the paediatric IOP, as well as the correlation of the CCT and IOP (determined by regression of IOP on CCT).

Primary and secondary outcomes are also shown in Figure 1.

### Data collection, management and analysis

#### Data collection and management of the present study

For data collection, a paper-based case report form (CRF) was developed and is used for each patient. In addition to all other documentation, the CRF and the patient's study file belongs to the source data. The CRF contains information that is requested directly from the patient and thus cannot be verified on the basis of the patient's study file (screening information and data collected in the OR).

For pseudonymization purposes, every patient is coded with a specific patient number. In addition to the paper-based form, this study is also documented electronically. For this purpose, all information from the study file and the CRF are transferred to the computer in a tabular form.

#### Access to data

Data management of the present study is performed by the main investigator. All electronically stored data are backed up regularly. The pseudonymity of patients is ensured throughout the evaluation. All study data, including the electronically recorded data, will be

1  
2  
3 archived and kept for at least 15 years after completion of the study according to the  
4 currently valid ICH Guidelines on Good Clinical Practice (GCP) E6 (R2). Data are accessible  
5 to all participating personnel and monitors. The database management system is capable of  
6 producing accurate and complete copies of the data in visual form for inspection by  
7 government agencies or ethics committees. Enrolled patients and their authorised  
8 representative have been informed about this.  
9

### 10 Monitoring

11 Prior to enrolling patients, the investigators were briefed on the CRF and study protocol. All  
12 documents required for data collection are available in the operating theatre. Each CRF is  
13 filled in by the investigator after the measurements have been performed. The data is then  
14 promptly entered electronically under his supervision. The investigator regularly evaluates  
15 the progress of data collection and study outcomes in order to address any emerging data  
16 collection issues at an early stage. The data monitoring is managed and analysed in  
17 accordance with the ICH GCP Guideline E6 (R2) and followed the requirements of German  
18 Drug Law.  
19

20  
21 Adverse events will be recorded after patient enrolment. The study will be temporarily  
22 interrupted by the attending investigator at any time on the individual subject, if a serious  
23 adverse event is suspected, which may be associated with IOP measurement or an airway  
24 device being used. A suspected adverse event or adverse reaction will be considered  
25 serious when it comes to one of the following events: death, a life threatening reaction leading  
26 to inpatient hospitalization, and a persistent or significant incapacity or substantial disability  
27 of the normal age-adapted life functions. If the protocol is discontinued as a result of an  
28 adverse event, study personnel will document the circumstances and data leading to the  
29 discontinuation of measurement. The principal investigator will inform the local research  
30 ethics committee (REC) in case of a severe adverse event following local standard operating  
31 procedures.  
32  
33

34 The Clinical Research Unit of the Department of Anaesthesiology, University Center Mainz  
35 inspects and reviews screening forms and clinical data at regular intervals.  
36  
37

### 38 Sample size considerations

39 With the envisaged number of 100 subjects, a single IOP measurement of one eye and  
40 parallel determination of the BIS, the null hypothesis "correlation = 0" can be rejected in a  
41 two-sided test at the 5% level with 86.5% power if the correlation amounts to 0.3. If the actual  
42 correlation is 0.35, the power rises to 95%. The multiple measurements provide additional  
43 information, resulting in a power gain. It is not yet possible to anticipate how strong the  
44 correlation between the multiple measurements will be. With decreasing correlation between  
45 repeat measurements power increases and, similarly, also smaller correlation between IOP  
46 and BIS will be detectable for fixed power – how small depends on the yet unknown  
47 correlations. For the control group, we selected 20 children, having feasibility in mind. We  
48 will, however, include further children in this group.  
49  
50  
51

52 For statistical analysis, SAS statistical software will be used. The analysis corresponds to  
53 STROBE statement for observational studies.  
54  
55  
56

### 57 Description of patient group at baseline

58 The baseline features of patients will be described using absolute numbers (n) and  
59 percentages for categorical variables and the minimum, maximum, mean and standard  
60 deviation for normally distributed variable and as median (IQR) for non-Gaussian variables.



1  
2  
3 The Pearson correlation coefficient will be used to compare patient specifics between the  
4 groups and the baseline.  
5

### 6 **Analysis of the primary outcome**

7  
8 The relationship between the IOP and BIS will be investigated using a mixed linear model  
9 including measurements at all three time points. In this model, IOP is the dependent variable,  
10 the BIS is the main independent variable. Random effects are subject and eye (of a subject).  
11 Time per se is not of interest as essentially the depth of anaesthesia measured by BIS at  
12 each time point is of interest. Time will be considered by taking repeated measurements into  
13 account. Further, we will adjust for age (quantitative), sex, CCT, and cumulative midazolam  
14 dose administered until the time of measurement) Eyes within a patient are likely not to be  
15 independent, therefore a random patient effect is included in the model.  
16

### 17 **Analysis of the secondary outcome**

18  
19 To compare the two measurement methods for IOP, applanation tonometry and rebound  
20 tonometry, Bland-Altman diagrams will be created.

21 The dependence of IOP under general anaesthesia on the cuff pressure of the laryngeal  
22 mask, the end tidal CO<sub>2</sub> partial pressure, the blood pressure and the heart rate will also be  
23 described by a mixed linear model, with the variables mentioned above as covariates and  
24 random effects for subject and eye and adjustment for corneal thickness. The general  
25 considerations for the primary outcome apply here, too.

26 For children without glaucoma, a quantile regression will be performed that takes into  
27 account the factors mentioned above. From this, it is possible to deduce standard ranges in  
28 which e.g. 90% or 95% of the values of healthy children are expected.  
29

### 30 **Subgroup analysis**

31  
32 Data from children who had to undergo mask induction will be analyzed separately.  
33

## 34 **DISCUSSION**

35 Several studies have documented various variables that have an impact on the paediatric  
36 IOP [3]. The weakness of the previously published studies is that none has examined all in a  
37 single study setting. To our current knowledge, the EyeBIS study is the only clinical study of  
38 its kind to associate IOP in 100 childhood glaucoma patients and 20 non-glaucoma patients  
39 (control group) with the depth of anaesthesia under the best possible standardized  
40 environmental conditions. Due to the exclusivity and safety of our patient population.  
41

42  
43 In conclusion, if our study will find a partial correlation between BIS and IOP this could lead  
44 to more reliable IOP data in childhood glaucoma examinations under anaesthesia. This  
45 protocol could be a reference standard for children with suspected glaucoma who cannot  
46 undergo an examination while awake. This leads to an improved, more reliable ability to  
47 diagnose glaucoma with an earlier therapy, which overall leads to a significantly better  
48 functional outcome for children.  
49

## 50 **ETHICS AND DISSEMINATION**

### 51 **Research ethics approval**

52  
53 The requirements of the ICH Guideline for Good Clinical Practice (GCP) E6 of June 1996  
54 and of CPMP/ICH/135/95 of September 1997 are, in addition to the national laws and the  
55 Declaration of Helsinki (Somerset West 1996), the basis for carrying out this study.  
56

57  
58 All study personnel are obliged to participate in this study according to these guidelines.  
59  
60

### **Consent or assent**

Before being included in the study, the study will be verbally and comprehensibly explained to patient and one of his/her authorized representatives by a clinical study investigator, as required by German law. He/she will also receive a comprehensively written information sheet. The authorized representatives will have the opportunity to have an informed discussion with the clinical study investigator about the study.

The clinical study investigator will obtain written consent from the authorized representatives willing to participate in the trial. The information leaflet and a new execution of the consent document will be handed over to one of the authorized representatives. Upon request, the patient will receive a child-friendly version of the information leaflet.

The authorised representative may withdraw from the study at any time if he/she is unwilling to continue in the trial. In this case, the data from a patient who requests full withdrawal will not be considered in the data analysis.

### **Confidentiality**

All original documents will be kept in the clinical research unit for the next 15 years. The study data will be handled as requested by the German Federal Data Protection Act, which implements the Directive 95/46/EC on data protection (Data Protection Directive). All original records will be kept on file at the trial sites or coordinating data managing centre for 15 years. The cleaned electronic trial database file will be anonymized and kept on file for 15 years.

### **Acknowledgements**

The authors would like to thank all involved doctors and nurses of the Department of Anaesthesiology and Ophthalmology for their great effort and support for this study. They also thank Patricia Buchholz RPh, PhD for writing support.

### **Author contributions**

The study concept and design were conceived by NP, EMH, KM, IS and EW. NP, EMH and KM are conducting screening and data collection. Analysis and interpretation of data will be performed by IS, EW, NP, EMH, KM, FG and AKS.

KM and NP prepared the first draft of the manuscript. All (NP, FG, EMH, KM, IS, EW, AKS, KM) authors have provided edits and critiqued the manuscript for intellectual content, as well as have given final approval for manuscript submission. Results of this study will be part of the doctoral thesis of KM.

### **Funding**

This research received no specific funding from any source (public, commercial or not-for-profit).

### **Declaration of interests**

Neither the University Medical Centre of the Johannes Gutenberg University, Mainz, nor its employees received any compensation for this study. There is no externally generated funding or competing interests. None of the authors has indicated financial interests or paid fees received in the course of this study. None of the authors has a personal relationship with companies, organizations or individuals that could interfere with this work in an inappropriate manner. Perkins, iCare, Ambu, 3M and Medtronic, whose products are included in this study, played no part in the funding, design, conduct, evaluation or publication of this study.

**Provenance and peer review**

Not commissioned; externally peer reviewed.

**Open Access**

This is an Open Access article distributed in accordance with the Creative Commons Attribution Non Commercial (CC BY-NC 4.0) license, which permits others to distribute, remix, adapt, build upon this work non-commercially, and license their derivative works on different terms, provided the original work is properly cited and the use is non-commercial. See: <http://creativecommons.org/licenses/by-nc/4.0/>

© Article author(s) (or their employer(s) unless otherwise stated in the text of the article) 2019. All rights reserved. No commercial use is permitted unless otherwise expressly granted.

The results of this study will be presented at conferences and published in peer reviewed journals

**Figure captions**

Figure 1:

Study flow chart according to American Society of Anaesthesiologists (ASA) with inclusion and exclusion criteria, as well as outcome measures

Figure 2:

Schedule of study enrolment and interventions. i.v., intravenous; SpO<sub>2</sub>, oxygen saturation; ECG, electrocardiography; BIS, bispectral index; IOP, intraocular pressure.

Figure 3:

EyeBIS worksheet. Detailed layout of all steps on the interventional time scale

For peer review only

## References

1. Sihota R, Tuli D, Dada T, et al. Distribution and determinants of intraocular pressure in a normal pediatric population. *J Pediatr Ophthalmol Strabismus* 2006;43(1):14-8.
2. Oberacher-Velten I, Prasser C, Rochon J, et al. The effects of midazolam on intraocular pressure in children during examination under sedation. *Br J Ophthalmol* 2011;95(8):1102-5.
3. Mikhail M, Sabri K, Levin AV. Effect of anesthesia on intraocular pressure measurement in children. *Surv Ophthalmol* 2017;62(5):648-58.
4. Chan AW, Tetzlaff JM, Gotsche PC, et al. SPIRIT 2013 explanation and elaboration: guidance for protocols of clinical trials. *BMJ* 2013;346:e7586.
5. Montazeri K, Dehghan A, Akbari S. Increase in intraocular pressure is less with propofol and remifentanil than isoflurane with remifentanil during cataract surgery: A randomized controlled trial. *Adv Biomed Res* 2015;4:55.
6. Hanna SF, Ahmad F, Pappas AL, et al. The effect of propofol/remifentanil rapid-induction technique without muscle relaxants on intraocular pressure. *J Clin Anesth* 2010;22(6):437-42.
7. Termuhlen J, Gottschalk A, Eter N, et al. Does general anesthesia have a clinical impact on intraocular pressure in children? *Paediatr Anaesth* 2016;26(9):936-41.
8. Barclay K, Wall T, Wareham K, et al. Intra-ocular pressure changes in patients with glaucoma. Comparison between the laryngeal mask airway and tracheal tube. *Anaesthesia* 1994;49(2):159-62.
9. Deramoudt V, Gaudon M, Malledant Y, et al. [Effects of propofol on intraocular pressure in surgery of strabismus in children]. *Ann Fr Anesth Reanim* 1990;9(1):1-5.
10. Derbyshire DR, Smith G, Achola KJ. Effect of topical lignocaine on the sympathoadrenal responses to tracheal intubation. *Br J Anaesth* 1987;59(3):300-4.
11. Watcha MF, Chu FC, Stevens JL, et al. Intraocular pressure and hemodynamic changes following tracheal intubation in children. *J Clin Anesth* 1991;3(4):310-3.
12. Watcha MF, White PF, Tychsen L, et al. Comparative effects of laryngeal mask airway and endotracheal tube insertion on intraocular pressure in children. *Anesth Analg* 1992;75(3):355-60.
13. Patel A, Clark SR, Schiffmiller M, et al. A survey of practice patterns in the use of laryngeal mask by pediatric anesthesiologists. *Paediatr Anaesth* 2015;25(11):1127-31.
14. Agrawal G, Agarwal M, Taneja S. A randomized comparative study of intraocular pressure and hemodynamic changes on insertion of proseal laryngeal mask airway and conventional tracheal intubation in pediatric patients. *J Anaesthesiol Clin Pharmacol* 2012;28(3):326-9.
15. Schäfer R, Klett J, Auffarth G, et al. Intraocular pressure more reduced during anesthesia with propofol than with sevoflurane: both combined with remifentanil. *Acta Anaesthesiol Scand* 2002;46(6):703-6.
16. Dominguez A, Garcia-Miguel FJ, Alsina E, et al. Intraocular pressure measurement in children under general anaesthesia with sevoflurane. *Eur J Anaesthesiol* 2009;26(9):801-3.
17. Piepho T, Cavus E, Noppens R, et al. S1 guidelines on airway management : Guideline of the German Society of Anesthesiology and Intensive Care Medicine. *Anaesthesist* 2015;64 Suppl 1:27-40.
18. Lenoir RJ. Venous congestion of the neck; its relation to laryngeal mask cuff pressures. *Br J Anaesth* 2004;93(3):476-7.
19. Lopes JE, Wilson RR, Alvim HS, et al. Central corneal thickness in pediatric glaucoma. *J Pediatr Ophthalmol Strabismus* 2007;44(2):112-7.
20. Levy J, Lifshitz T, Rosen S, et al. Is the tono-pen accurate for measuring intraocular pressure in young children with congenital glaucoma? *J aapos* 2005;9(4):321-5.
21. Perkins ES. Hand-held applanation tonometer. *Br J Ophthalmol* 1965;49(11):591-3.

- 1
  - 2
  - 3
  - 4
  - 5
  - 6
  - 7
  - 8
  - 9
  - 10
  - 11
  - 12
  - 13
  - 14
  - 15
  - 16
  - 17
  - 18
  - 19
  - 20
  - 21
  - 22
  - 23
  - 24
  - 25
  - 26
  - 27
  - 28
  - 29
  - 30
  - 31
  - 32
  - 33
  - 34
  - 35
  - 36
  - 37
  - 38
  - 39
  - 40
  - 41
  - 42
  - 43
  - 44
  - 45
  - 46
  - 47
  - 48
  - 49
  - 50
  - 51
  - 52
  - 53
  - 54
  - 55
  - 56
  - 57
  - 58
  - 59
  - 60
22. Esmael A, Ismail YM, Elhusseiny AM, et al. Agreement profiles for rebound and applanation tonometry in normal and glaucomatous children. *Eur J Ophthalmol* 2019;29(4):379-85.
23. Nakakura S. Icare(®) rebound tonometers: review of their characteristics and ease of use. *Clin Ophthalmol* 2018;12:1245-53.

For peer review only



Day 0

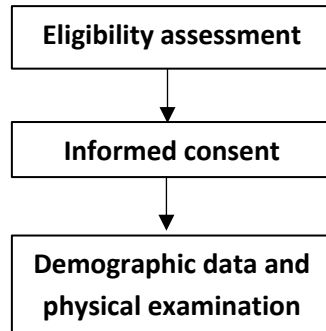

Day 1

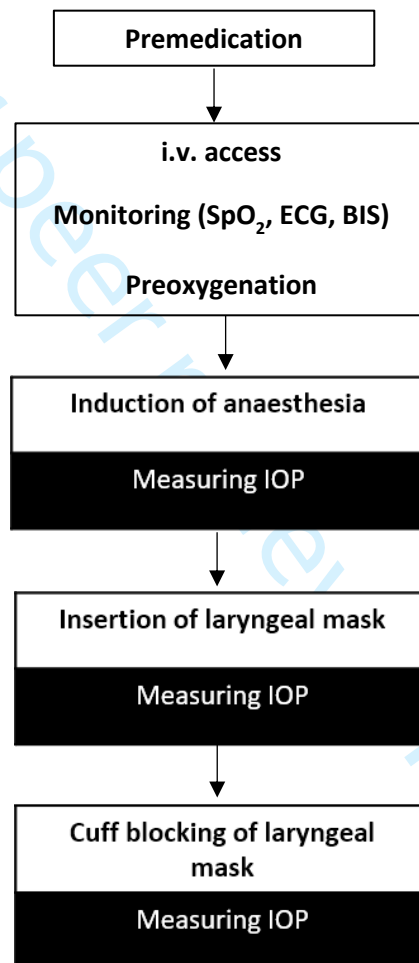





# eyeBIS Worksheet Anaesthesia

## TIVA

Preoxygenation

$FiO_2 = 0.8$   
Fresh gas flow 7 l/min



# Reporting checklist for protocol of a clinical trial.

Based on the SPIRIT guidelines.

## Instructions to authors

Complete this checklist by entering the page numbers from your manuscript where readers will find each of the items listed below.

Your article may not currently address all the items on the checklist. Please modify your text to include the missing information. If you are certain that an item does not apply, please write "n/a" and provide a short explanation.

Upload your completed checklist as an extra file when you submit to a journal.

In your methods section, say that you used the SPIRIT reporting guidelines, and cite them as:

Chan A-W, Tetzlaff JM, Gøtzsche PC, Altman DG, Mann H, Berlin J, Dickersin K, Hróbjartsson A, Schulz KF, Parulekar WR, Krleža-Jerić K, Laupacis A, Moher D. SPIRIT 2013 Explanation and Elaboration: Guidance for protocols of clinical trials. *BMJ*. 2013;346:e7586

|                                             |                     | Reporting Item                                                                                               | Page Number |
|---------------------------------------------|---------------------|--------------------------------------------------------------------------------------------------------------|-------------|
| <b>Administrative information</b>           |                     |                                                                                                              |             |
| Title                                       | <a href="#">#1</a>  | Descriptive title identifying the study design, population, interventions, and, if applicable, trial acronym | 1           |
| Trial registration                          | <a href="#">#2a</a> | Trial identifier and registry name. If not yet registered, name of intended registry                         | 2           |
| Trial registration: data set                | <a href="#">#2b</a> | All items from the World Health Organization Trial Registration Data Set                                     | n/a         |
| Protocol version                            | <a href="#">#3</a>  | Date and version identifier                                                                                  | n/a         |
| Funding                                     | <a href="#">#4</a>  | Sources and types of financial, material, and other support                                                  | 11          |
| Roles and responsibilities: contributorship | <a href="#">#5a</a> | Names, affiliations, and roles of protocol contributors                                                      | 11          |

|    |                           |                     |                                                                   |    |
|----|---------------------------|---------------------|-------------------------------------------------------------------|----|
| 1  | Roles and                 | <a href="#">#5b</a> | Name and contact information for the trial sponsor                | 11 |
| 2  | responsibilities:         |                     |                                                                   |    |
| 3  | sponsor contact           |                     |                                                                   |    |
| 4  | information               |                     |                                                                   |    |
| 5  |                           |                     |                                                                   |    |
| 6  |                           |                     |                                                                   |    |
| 7  |                           |                     |                                                                   |    |
| 8  | Roles and                 | <a href="#">#5c</a> | Role of study sponsor and funders, if any, in study design;       | 11 |
| 9  | responsibilities:         |                     | collection, management, analysis, and interpretation of data;     |    |
| 10 | sponsor and funder        |                     | writing of the report; and the decision to submit the report for  |    |
| 11 |                           |                     | publication, including whether they will have ultimate            |    |
| 12 |                           |                     | authority over any of these activities                            |    |
| 13 |                           |                     |                                                                   |    |
| 14 |                           |                     |                                                                   |    |
| 15 |                           |                     |                                                                   |    |
| 16 | Roles and                 | <a href="#">#5d</a> | Composition, roles, and responsibilities of the coordinating      | 11 |
| 17 | responsibilities:         |                     | centre, steering committee, endpoint adjudication committee,      |    |
| 18 | committees                |                     | data management team, and other individuals or groups             |    |
| 19 |                           |                     | overseeing the trial, if applicable (see Item 21a for data        |    |
| 20 |                           |                     | monitoring committee)                                             |    |
| 21 |                           |                     |                                                                   |    |
| 22 |                           |                     |                                                                   |    |
| 23 |                           |                     |                                                                   |    |
| 24 | <b>Introduction</b>       |                     |                                                                   |    |
| 25 |                           |                     |                                                                   |    |
| 26 |                           |                     |                                                                   |    |
| 27 | Background and            | <a href="#">#6a</a> | Description of research question and justification for            | 4  |
| 28 | rationale                 |                     | undertaking the trial, including summary of relevant studies      |    |
| 29 |                           |                     | (published and unpublished) examining benefits and harms for      |    |
| 30 |                           |                     | each intervention                                                 |    |
| 31 |                           |                     |                                                                   |    |
| 32 |                           |                     |                                                                   |    |
| 33 |                           |                     |                                                                   |    |
| 34 | Background and            | <a href="#">#6b</a> | Explanation for choice of comparators                             | 4  |
| 35 | rationale: choice of      |                     |                                                                   |    |
| 36 | comparators               |                     |                                                                   |    |
| 37 |                           |                     |                                                                   |    |
| 38 |                           |                     |                                                                   |    |
| 39 | Objectives                | <a href="#">#7</a>  | Specific objectives or hypotheses                                 | 4  |
| 40 |                           |                     |                                                                   |    |
| 41 | Trial design              | <a href="#">#8</a>  | Description of trial design including type of trial (eg, parallel | 5  |
| 42 |                           |                     | group, crossover, factorial, single group), allocation ratio, and |    |
| 43 |                           |                     | framework (eg, superiority, equivalence, non-inferiority,         |    |
| 44 |                           |                     | exploratory)                                                      |    |
| 45 |                           |                     |                                                                   |    |
| 46 |                           |                     |                                                                   |    |
| 47 |                           |                     |                                                                   |    |
| 48 | <b>Methods:</b>           |                     |                                                                   |    |
| 49 | <b>Participants,</b>      |                     |                                                                   |    |
| 50 | <b>interventions, and</b> |                     |                                                                   |    |
| 51 | <b>outcomes</b>           |                     |                                                                   |    |
| 52 |                           |                     |                                                                   |    |
| 53 |                           |                     |                                                                   |    |
| 54 |                           |                     |                                                                   |    |
| 55 | Study setting             | <a href="#">#9</a>  | Description of study settings (eg, community clinic, academic     | 5  |
| 56 |                           |                     | hospital) and list of countries where data will be collected.     |    |
| 57 |                           |                     | Reference to where list of study sites can be obtained            |    |
| 58 |                           |                     |                                                                   |    |
| 59 |                           |                     |                                                                   |    |
| 60 |                           |                     |                                                                   |    |

|    |                      |                      |                                                                                                                                                                                                                                                                                                                                                                                |   |
|----|----------------------|----------------------|--------------------------------------------------------------------------------------------------------------------------------------------------------------------------------------------------------------------------------------------------------------------------------------------------------------------------------------------------------------------------------|---|
| 1  | Eligibility criteria | <a href="#">#10</a>  | Inclusion and exclusion criteria for participants. If applicable, eligibility criteria for study centres and individuals who will perform the interventions (eg, surgeons, psychotherapists)                                                                                                                                                                                   | 5 |
| 2  |                      |                      |                                                                                                                                                                                                                                                                                                                                                                                |   |
| 3  |                      |                      |                                                                                                                                                                                                                                                                                                                                                                                |   |
| 4  |                      |                      |                                                                                                                                                                                                                                                                                                                                                                                |   |
| 5  |                      |                      |                                                                                                                                                                                                                                                                                                                                                                                |   |
| 6  | Interventions:       | <a href="#">#11a</a> | Interventions for each group with sufficient detail to allow replication, including how and when they will be administered                                                                                                                                                                                                                                                     | 6 |
| 7  | description          |                      |                                                                                                                                                                                                                                                                                                                                                                                |   |
| 8  |                      |                      |                                                                                                                                                                                                                                                                                                                                                                                |   |
| 9  |                      |                      |                                                                                                                                                                                                                                                                                                                                                                                |   |
| 10 | Interventions:       | <a href="#">#11b</a> | Criteria for discontinuing or modifying allocated interventions for a given trial participant (eg, drug dose change in response to harms, participant request, or improving / worsening disease)                                                                                                                                                                               | 6 |
| 11 | modifications        |                      |                                                                                                                                                                                                                                                                                                                                                                                |   |
| 12 |                      |                      |                                                                                                                                                                                                                                                                                                                                                                                |   |
| 13 |                      |                      |                                                                                                                                                                                                                                                                                                                                                                                |   |
| 14 |                      |                      |                                                                                                                                                                                                                                                                                                                                                                                |   |
| 15 |                      |                      |                                                                                                                                                                                                                                                                                                                                                                                |   |
| 16 |                      |                      |                                                                                                                                                                                                                                                                                                                                                                                |   |
| 17 | Interventions:       | <a href="#">#11c</a> | Strategies to improve adherence to intervention protocols, and any procedures for monitoring adherence (eg, drug tablet return; laboratory tests)                                                                                                                                                                                                                              | 6 |
| 18 | adherence            |                      |                                                                                                                                                                                                                                                                                                                                                                                |   |
| 19 |                      |                      |                                                                                                                                                                                                                                                                                                                                                                                |   |
| 20 |                      |                      |                                                                                                                                                                                                                                                                                                                                                                                |   |
| 21 |                      |                      |                                                                                                                                                                                                                                                                                                                                                                                |   |
| 22 | Interventions:       | <a href="#">#11d</a> | Relevant concomitant care and interventions that are permitted or prohibited during the trial                                                                                                                                                                                                                                                                                  | 6 |
| 23 | concomitant care     |                      |                                                                                                                                                                                                                                                                                                                                                                                |   |
| 24 |                      |                      |                                                                                                                                                                                                                                                                                                                                                                                |   |
| 25 |                      |                      |                                                                                                                                                                                                                                                                                                                                                                                |   |
| 26 | Outcomes             | <a href="#">#12</a>  | Primary, secondary, and other outcomes, including the specific measurement variable (eg, systolic blood pressure), analysis metric (eg, change from baseline, final value, time to event), method of aggregation (eg, median, proportion), and time point for each outcome. Explanation of the clinical relevance of chosen efficacy and harm outcomes is strongly recommended | 9 |
| 27 |                      |                      |                                                                                                                                                                                                                                                                                                                                                                                |   |
| 28 |                      |                      |                                                                                                                                                                                                                                                                                                                                                                                |   |
| 29 |                      |                      |                                                                                                                                                                                                                                                                                                                                                                                |   |
| 30 |                      |                      |                                                                                                                                                                                                                                                                                                                                                                                |   |
| 31 |                      |                      |                                                                                                                                                                                                                                                                                                                                                                                |   |
| 32 |                      |                      |                                                                                                                                                                                                                                                                                                                                                                                |   |
| 33 |                      |                      |                                                                                                                                                                                                                                                                                                                                                                                |   |
| 34 |                      |                      |                                                                                                                                                                                                                                                                                                                                                                                |   |
| 35 |                      |                      |                                                                                                                                                                                                                                                                                                                                                                                |   |
| 36 |                      |                      |                                                                                                                                                                                                                                                                                                                                                                                |   |
| 37 | Participant timeline | <a href="#">#13</a>  | Time schedule of enrolment, interventions (including any run-ins and washouts), assessments, and visits for participants. A schematic diagram is highly recommended (see Figure)                                                                                                                                                                                               | 5 |
| 38 |                      |                      |                                                                                                                                                                                                                                                                                                                                                                                |   |
| 39 |                      |                      |                                                                                                                                                                                                                                                                                                                                                                                |   |
| 40 |                      |                      |                                                                                                                                                                                                                                                                                                                                                                                |   |
| 41 |                      |                      |                                                                                                                                                                                                                                                                                                                                                                                |   |
| 42 |                      |                      |                                                                                                                                                                                                                                                                                                                                                                                |   |
| 43 | Sample size          | <a href="#">#14</a>  | Estimated number of participants needed to achieve study objectives and how it was determined, including clinical and statistical assumptions supporting any sample size calculations                                                                                                                                                                                          | 9 |
| 44 |                      |                      |                                                                                                                                                                                                                                                                                                                                                                                |   |
| 45 |                      |                      |                                                                                                                                                                                                                                                                                                                                                                                |   |
| 46 |                      |                      |                                                                                                                                                                                                                                                                                                                                                                                |   |
| 47 |                      |                      |                                                                                                                                                                                                                                                                                                                                                                                |   |
| 48 | Recruitment          | <a href="#">#15</a>  | Strategies for achieving adequate participant enrolment to reach target sample size                                                                                                                                                                                                                                                                                            | 5 |
| 49 |                      |                      |                                                                                                                                                                                                                                                                                                                                                                                |   |
| 50 |                      |                      |                                                                                                                                                                                                                                                                                                                                                                                |   |
| 51 |                      |                      |                                                                                                                                                                                                                                                                                                                                                                                |   |

## Methods:

### Assignment of interventions (for controlled trials)

|    |                        |                      |                                                                 |     |
|----|------------------------|----------------------|-----------------------------------------------------------------|-----|
| 1  | Allocation: sequence   | <a href="#">#16a</a> | Method of generating the allocation sequence (eg, computer-     | n/a |
| 2  | generation             |                      | generated random numbers), and list of any factors for          |     |
| 3  |                        |                      | stratification. To reduce predictability of a random sequence,  |     |
| 4  |                        |                      | details of any planned restriction (eg, blocking) should be     |     |
| 5  |                        |                      | provided in a separate document that is unavailable to those    |     |
| 6  |                        |                      | who enrol participants or assign interventions                  |     |
| 7  |                        |                      |                                                                 |     |
| 8  |                        |                      |                                                                 |     |
| 9  |                        |                      |                                                                 |     |
| 10 | Allocation             | <a href="#">#16b</a> | Mechanism of implementing the allocation sequence (eg,          | n/a |
| 11 | concealment            |                      | central telephone; sequentially numbered, opaque, sealed        |     |
| 12 | mechanism              |                      | envelopes), describing any steps to conceal the sequence until  |     |
| 13 |                        |                      | interventions are assigned                                      |     |
| 14 |                        |                      |                                                                 |     |
| 15 |                        |                      |                                                                 |     |
| 16 |                        |                      |                                                                 |     |
| 17 | Allocation:            | <a href="#">#16c</a> | Who will generate the allocation sequence, who will enrol       | 5   |
| 18 | implementation         |                      | participants, and who will assign participants to interventions |     |
| 19 |                        |                      |                                                                 |     |
| 20 |                        |                      |                                                                 |     |
| 21 | Blinding (masking)     | <a href="#">#17a</a> | Who will be blinded after assignment to interventions (eg,      | n/a |
| 22 |                        |                      | trial participants, care providers, outcome assessors, data     |     |
| 23 |                        |                      | analysts), and how                                              |     |
| 24 |                        |                      |                                                                 |     |
| 25 |                        |                      |                                                                 |     |
| 26 |                        |                      |                                                                 |     |
| 27 | Blinding (masking):    | <a href="#">#17b</a> | If blinded, circumstances under which unblinding is             | n/a |
| 28 | emergency unblinding   |                      | permissible, and procedure for revealing a participant's        |     |
| 29 |                        |                      | allocated intervention during the trial                         |     |
| 30 |                        |                      |                                                                 |     |
| 31 |                        |                      |                                                                 |     |
| 32 | <b>Methods: Data</b>   |                      |                                                                 |     |
| 33 | <b>collection,</b>     |                      |                                                                 |     |
| 34 | <b>management, and</b> |                      |                                                                 |     |
| 35 | <b>analysis</b>        |                      |                                                                 |     |
| 36 |                        |                      |                                                                 |     |
| 37 |                        |                      |                                                                 |     |
| 38 |                        |                      |                                                                 |     |
| 39 | Data collection plan   | <a href="#">#18a</a> | Plans for assessment and collection of outcome, baseline, and   | 8   |
| 40 |                        |                      | other trial data, including any related processes to promote    |     |
| 41 |                        |                      | data quality (eg, duplicate measurements, training of           |     |
| 42 |                        |                      | assessors) and a description of study instruments (eg,          |     |
| 43 |                        |                      | questionnaires, laboratory tests) along with their reliability  |     |
| 44 |                        |                      | and validity, if known. Reference to where data collection      |     |
| 45 |                        |                      | forms can be found, if not in the protocol                      |     |
| 46 |                        |                      |                                                                 |     |
| 47 |                        |                      |                                                                 |     |
| 48 |                        |                      |                                                                 |     |
| 49 |                        |                      |                                                                 |     |
| 50 | Data collection plan:  | <a href="#">#18b</a> | Plans to promote participant retention and complete follow-     | 8   |
| 51 | retention              |                      | up, including list of any outcome data to be collected for      |     |
| 52 |                        |                      | participants who discontinue or deviate from intervention       |     |
| 53 |                        |                      | protocols                                                       |     |
| 54 |                        |                      |                                                                 |     |
| 55 |                        |                      |                                                                 |     |
| 56 |                        |                      |                                                                 |     |
| 57 | Data management        | <a href="#">#19</a>  | Plans for data entry, coding, security, and storage, including  | 8   |
| 58 |                        |                      | any related processes to promote data quality (eg, double data  |     |
| 59 |                        |                      |                                                                 |     |
| 60 |                        |                      |                                                                 |     |

entry; range checks for data values). Reference to where details of data management procedures can be found, if not in the protocol

|    |                            |                                                                 |     |
|----|----------------------------|-----------------------------------------------------------------|-----|
| 1  |                            |                                                                 |     |
| 2  |                            |                                                                 |     |
| 3  |                            |                                                                 |     |
| 4  |                            |                                                                 |     |
| 5  | Statistics: outcomes       | <a href="#">#20a</a>                                            | 9   |
| 6  |                            | Statistical methods for analysing primary and secondary         |     |
| 7  |                            | outcomes. Reference to where other details of the statistical   |     |
| 8  |                            | analysis plan can be found, if not in the protocol              |     |
| 9  |                            |                                                                 |     |
| 10 | Statistics: additional     | <a href="#">#20b</a>                                            | 9   |
| 11 | analyses                   | Methods for any additional analyses (eg, subgroup and           |     |
| 12 |                            | adjusted analyses)                                              |     |
| 13 |                            |                                                                 |     |
| 14 | Statistics: analysis       | <a href="#">#20c</a>                                            | 9   |
| 15 | population and             | Definition of analysis population relating to protocol non-     |     |
| 16 | missing data               | adherence (eg, as randomised analysis), and any statistical     |     |
| 17 |                            | methods to handle missing data (eg, multiple imputation)        |     |
| 18 |                            |                                                                 |     |
| 19 |                            |                                                                 |     |
| 20 | <b>Methods: Monitoring</b> |                                                                 |     |
| 21 |                            |                                                                 |     |
| 22 | Data monitoring:           | <a href="#">#21a</a>                                            | 8   |
| 23 | formal committee           | Composition of data monitoring committee (DMC); summary         |     |
| 24 |                            | of its role and reporting structure; statement of whether it is |     |
| 25 |                            | independent from the sponsor and competing interests; and       |     |
| 26 |                            | reference to where further details about its charter can be     |     |
| 27 |                            | found, if not in the protocol. Alternatively, an explanation of |     |
| 28 |                            | why a DMC is not needed                                         |     |
| 29 |                            |                                                                 |     |
| 30 |                            |                                                                 |     |
| 31 |                            |                                                                 |     |
| 32 | Data monitoring:           | <a href="#">#21b</a>                                            | n/a |
| 33 | interim analysis           | Description of any interim analyses and stopping guidelines,    |     |
| 34 |                            | including who will have access to these interim results and     |     |
| 35 |                            | make the final decision to terminate the trial                  |     |
| 36 |                            |                                                                 |     |
| 37 | Harms                      | <a href="#">#22</a>                                             | 9   |
| 38 |                            | Plans for collecting, assessing, reporting, and managing        |     |
| 39 |                            | solicited and spontaneously reported adverse events and other   |     |
| 40 |                            | unintended effects of trial interventions or trial conduct      |     |
| 41 |                            |                                                                 |     |
| 42 |                            |                                                                 |     |
| 43 | Auditing                   | <a href="#">#23</a>                                             | 9   |
| 44 |                            | Frequency and procedures for auditing trial conduct, if any,    |     |
| 45 |                            | and whether the process will be independent from                |     |
| 46 |                            | investigators and the sponsor                                   |     |
| 47 |                            |                                                                 |     |
| 48 | <b>Ethics and</b>          |                                                                 |     |
| 49 | <b>dissemination</b>       |                                                                 |     |
| 50 |                            |                                                                 |     |
| 51 |                            |                                                                 |     |
| 52 | Research ethics            | <a href="#">#24</a>                                             | 5   |
| 53 | approval                   | Plans for seeking research ethics committee / institutional     |     |
| 54 |                            | review board (REC / IRB) approval                               |     |
| 55 |                            |                                                                 |     |
| 56 | Protocol amendments        | <a href="#">#25</a>                                             | n/a |
| 57 |                            | Plans for communicating important protocol modifications        |     |
| 58 |                            | (eg, changes to eligibility criteria, outcomes, analyses) to    |     |
| 59 |                            |                                                                 |     |
| 60 |                            |                                                                 |     |

relevant parties (eg, investigators, REC / IRBs, trial participants, trial registries, journals, regulators)

|    |                                             |                      |                                                                                                                                                                                                                                                                                     |
|----|---------------------------------------------|----------------------|-------------------------------------------------------------------------------------------------------------------------------------------------------------------------------------------------------------------------------------------------------------------------------------|
| 1  |                                             |                      |                                                                                                                                                                                                                                                                                     |
| 2  |                                             |                      |                                                                                                                                                                                                                                                                                     |
| 3  |                                             |                      |                                                                                                                                                                                                                                                                                     |
| 4  | Consent or assent                           | <a href="#">#26a</a> | Who will obtain informed consent or assent from potential trial participants or authorised surrogates, and how (see Item 32)                                                                                                                                                        |
| 5  |                                             |                      |                                                                                                                                                                                                                                                                                     |
| 6  |                                             |                      |                                                                                                                                                                                                                                                                                     |
| 7  |                                             |                      |                                                                                                                                                                                                                                                                                     |
| 8  |                                             |                      |                                                                                                                                                                                                                                                                                     |
| 9  | Consent or assent: ancillary studies        | <a href="#">#26b</a> | Additional consent provisions for collection and use of participant data and biological specimens in ancillary studies, if applicable                                                                                                                                               |
| 10 |                                             |                      |                                                                                                                                                                                                                                                                                     |
| 11 |                                             |                      |                                                                                                                                                                                                                                                                                     |
| 12 |                                             |                      |                                                                                                                                                                                                                                                                                     |
| 13 |                                             |                      |                                                                                                                                                                                                                                                                                     |
| 14 | Confidentiality                             | <a href="#">#27</a>  | How personal information about potential and enrolled participants will be collected, shared, and maintained in order to protect confidentiality before, during, and after the trial                                                                                                |
| 15 |                                             |                      |                                                                                                                                                                                                                                                                                     |
| 16 |                                             |                      |                                                                                                                                                                                                                                                                                     |
| 17 |                                             |                      |                                                                                                                                                                                                                                                                                     |
| 18 |                                             |                      |                                                                                                                                                                                                                                                                                     |
| 19 |                                             |                      |                                                                                                                                                                                                                                                                                     |
| 20 | Declaration of interests                    | <a href="#">#28</a>  | Financial and other competing interests for principal investigators for the overall trial and each study site                                                                                                                                                                       |
| 21 |                                             |                      |                                                                                                                                                                                                                                                                                     |
| 22 |                                             |                      |                                                                                                                                                                                                                                                                                     |
| 23 |                                             |                      |                                                                                                                                                                                                                                                                                     |
| 24 | Data access                                 | <a href="#">#29</a>  | Statement of who will have access to the final trial dataset, and disclosure of contractual agreements that limit such access for investigators                                                                                                                                     |
| 25 |                                             |                      |                                                                                                                                                                                                                                                                                     |
| 26 |                                             |                      |                                                                                                                                                                                                                                                                                     |
| 27 |                                             |                      |                                                                                                                                                                                                                                                                                     |
| 28 |                                             |                      |                                                                                                                                                                                                                                                                                     |
| 29 | Ancillary and post trial care               | <a href="#">#30</a>  | Provisions, if any, for ancillary and post-trial care, and for compensation to those who suffer harm from trial participation                                                                                                                                                       |
| 30 |                                             |                      |                                                                                                                                                                                                                                                                                     |
| 31 |                                             |                      |                                                                                                                                                                                                                                                                                     |
| 32 |                                             |                      |                                                                                                                                                                                                                                                                                     |
| 33 |                                             |                      |                                                                                                                                                                                                                                                                                     |
| 34 | Dissemination policy: trial results         | <a href="#">#31a</a> | Plans for investigators and sponsor to communicate trial results to participants, healthcare professionals, the public, and other relevant groups (eg, via publication, reporting in results databases, or other data sharing arrangements), including any publication restrictions |
| 35 |                                             |                      |                                                                                                                                                                                                                                                                                     |
| 36 |                                             |                      |                                                                                                                                                                                                                                                                                     |
| 37 |                                             |                      |                                                                                                                                                                                                                                                                                     |
| 38 |                                             |                      |                                                                                                                                                                                                                                                                                     |
| 39 |                                             |                      |                                                                                                                                                                                                                                                                                     |
| 40 |                                             |                      |                                                                                                                                                                                                                                                                                     |
| 41 |                                             |                      |                                                                                                                                                                                                                                                                                     |
| 42 |                                             |                      |                                                                                                                                                                                                                                                                                     |
| 43 | Dissemination policy: authorship            | <a href="#">#31b</a> | Authorship eligibility guidelines and any intended use of professional writers                                                                                                                                                                                                      |
| 44 |                                             |                      |                                                                                                                                                                                                                                                                                     |
| 45 |                                             |                      |                                                                                                                                                                                                                                                                                     |
| 46 |                                             |                      |                                                                                                                                                                                                                                                                                     |
| 47 | Dissemination policy: reproducible research | <a href="#">#31c</a> | Plans, if any, for granting public access to the full protocol, participant-level dataset, and statistical code                                                                                                                                                                     |
| 48 |                                             |                      |                                                                                                                                                                                                                                                                                     |
| 49 |                                             |                      |                                                                                                                                                                                                                                                                                     |

## Appendices

|    |                            |                     |                                                                                                                           |
|----|----------------------------|---------------------|---------------------------------------------------------------------------------------------------------------------------|
| 50 |                            |                     |                                                                                                                           |
| 51 |                            |                     |                                                                                                                           |
| 52 |                            |                     |                                                                                                                           |
| 53 | Informed consent materials | <a href="#">#32</a> | Model consent form and other related documentation given to participants and authorised surrogates                        |
| 54 |                            |                     |                                                                                                                           |
| 55 |                            |                     |                                                                                                                           |
| 56 |                            |                     |                                                                                                                           |
| 57 | Biological specimens       | <a href="#">#33</a> | Plans for collection, laboratory evaluation, and storage of biological specimens for genetic or molecular analysis in the |
| 58 |                            |                     |                                                                                                                           |
| 59 |                            |                     |                                                                                                                           |
| 60 |                            |                     |                                                                                                                           |

1 current trial and for future use in ancillary studies, if  
2 applicable  
3

4 The SPIRIT checklist is distributed under the terms of the Creative Commons Attribution License CC-BY-ND  
5 3.0. This checklist was completed on 14. September 2020 using <https://www.goodreports.org/>, a tool made by  
6 the [EQUATOR Network](#) in collaboration with [Penelope.ai](#)  
7  
8  
9  
10  
11  
12  
13  
14  
15  
16  
17  
18  
19  
20  
21  
22  
23  
24  
25  
26  
27  
28  
29  
30  
31  
32  
33  
34  
35  
36  
37  
38  
39  
40  
41  
42  
43  
44  
45  
46  
47  
48  
49  
50  
51  
52  
53  
54  
55  
56  
57  
58  
59  
60
